# Supplementary material for: One-pot synthesis of 2,2′-biquinolines from aromatic amines using oxygen as an oxidant under metal-free conditions
Source: Royal Society of Chemistry journal article supplement (doi:10.1039/d4qo01896f), 2024-11-14

## Supporting Information for

### One-Pot Synthesis of 2,2'-Biquinolines from Aromatic Amines under Oxygen as Oxidant and Metal-Free Conditions

Yunfeng Liao, <sup>\*a</sup> Hualan Gao, <sup>b</sup> Hongrui Qi, <sup>b</sup> Jia Chen, <sup>b</sup> Chang Liu, <sup>b</sup> Yanjun xie, <sup>a</sup> Weijie Zhang,  
<sup>a</sup> Jiyong Deng, <sup>a</sup> Bing Yi <sup>\*a</sup> and Guo-Jun Deng <sup>\*b</sup>

<sup>a</sup> Hunan Provincial Key Laboratory of Environmental Catalysis & Waste Recycling, College of Materials and Chemical Engineering, Hunan Institute of Engineering, Xiangtan, 411104, P. R. China; Email: liaoyunfeng900@126.com; bingyi2004@126.com.

<sup>b</sup> Key Laboratory for Green Organic Synthesis and Application of Hunan Province, Key Laboratory of Environmentally Friendly Chemistry and Application of Ministry of Education, College of Chemistry, Xiangtan University, Xiangtan 411105, P. R. China. Email: gjdeng@xtu.edu.cn.

#### Table of Contents

|                                                                                                       |              |
|-------------------------------------------------------------------------------------------------------|--------------|
| <b>1. General information</b>                                                                         | <b>2</b>     |
| <b>2. General procedure for preparation (4a)</b>                                                      | <b>2</b>     |
| <b>3. General procedure for preparation (5a)</b>                                                      | <b>2</b>     |
| <b>4. Gram-scale reaction</b>                                                                         | <b>2</b>     |
| <b>5. Application of 2,2'-biquinoline ligands for dehydrogenation and borrowing hydrogen reaction</b> | <b>3</b>     |
| <b>6. Characterization data of products</b>                                                           | <b>3-20</b>  |
| <b>7. References</b>                                                                                  | <b>20-21</b> |
| <b>8. Copies of <sup>1</sup>H and <sup>13</sup>C NMR spectra of all products</b>                      | <b>22-55</b> |

## 1. General information:

All reactions were carried out under an atmosphere of air unless otherwise noted. Column chromatography was performed using silica gel (200-300 mesh).  $^1\text{H}$  NMR and  $^{13}\text{C}$  NMR spectra were recorded on Bruker-AV (400 and 100 MHz, respectively) instrument internally referenced to tetramethylsilane (TMS) or chloroform signals. Mass spectra was measured on bruker 15T HRMS instrument (maldi). Melting points were measured with a YUHUA X-5 melting point instrument and were uncorrected. All reagents were obtained from commercial suppliers and used without further purification.

## 2. General procedure for preparation (4a):

A 10 mL sealed tube was charged with 4-methoxyaniline (**1a**, 49.2 mg, 0.4 mmol) and was purged with oxygen for three times. Then, 2-methylquinoline (**2a**, 27.1  $\mu\text{L}$ , 0.2 mmol), 55%HI (9.5  $\mu\text{L}$ , 0.08 mmol) and 1,4-dioxane (1.5 mL) were added to the sealed reaction vessel by syringe. The reaction vessel was stirred at 130  $^\circ\text{C}$  for 16 h. After cooling to room temperature, the volatiles were removed under reduced pressure. The residue was purified by column chromatography on silica gel (petroleum ether/EtOAc = 5:1) to yield the desired product **4a** as white solid (37.8 mg, 66% yield).

## 3. General procedure for preparation (5a):

A 10 mL sealed tube was purged with oxygen for three times and was added aniline (**1m**, 18.2  $\mu\text{L}$ , 0.2 mmol), 55%HI (11.9  $\mu\text{L}$ , 0.1 mmol) and 1,4-dioxane (1.5 mL) by syringe. The reaction vessel was stirred at 110  $^\circ\text{C}$  for 16 h. After cooling to room temperature, the volatiles were removed under reduced pressure. The residue was purified by column chromatography on silica gel (petroleum ether/EtOAc = 5:1) to yield the desired product **5a** as white solid (18.5 mg, 72% yield).

## 4. Gram-scale reaction

A 100 mL three neck flask with reflux condenser tube was added *p*-toluidine (**1d**, 1.2840 g, 12.0 mmol) and 6-methoxy-2-methylquinoline (**2c**, 1.0381 g, 6.0 mmol) and was purged with oxygen for three times. Next, 55%HI (0.357 mL, 3.0 mmol) and 1,4-dioxane (45 mL) were purged by

syringe. Reaction apparatus loaded with oxygen bulb. The reaction vessel was stirred at 100 °C for 16 h. After cooling to room temperature, the residue was purified by column chromatography on silica gel (petroleum ether/EtOAc = 5:1 to 2:1) afforded the product **4v** as yellow solid (1.0793 g, 60%), mp 249.3-253.2 °C.

## 5. Application of 2,2'-biquinoline ligands for dehydrogenation and borrowing hydrogen reaction<sup>[1]</sup>

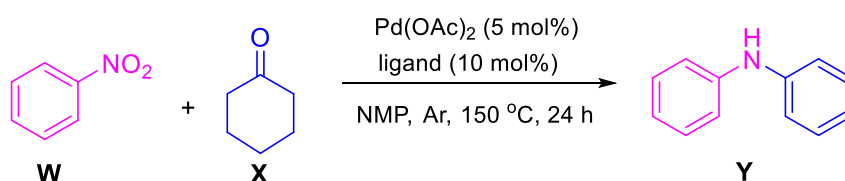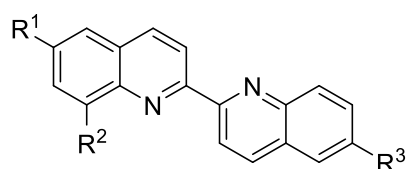

- 5a**, R<sup>1</sup> = H, R<sup>2</sup> = H, R<sup>3</sup> = H  
**4w**, R<sup>1</sup> = CH<sub>3</sub>, R<sup>2</sup> = H, R<sup>3</sup> = F  
**4v**, R<sup>1</sup> = CH<sub>3</sub>, R<sup>2</sup> = H, R<sup>3</sup> = OCH<sub>3</sub>  
**4d**, R<sup>1</sup> = CH<sub>3</sub>, R<sup>2</sup> = H, R<sup>3</sup> = H  
**4e**, R<sup>1</sup> = CH<sub>3</sub>, R<sup>2</sup> = CH<sub>3</sub>, R<sup>3</sup> = H

| entry | ligand    | yield <sup>a</sup> |
|-------|-----------|--------------------|
| 1     | <b>5a</b> | 68%                |
| 2     | <b>4w</b> | 70%                |
| 3     | <b>4v</b> | 65%                |
| 4     | <b>4d</b> | 50%                |
| 5     | <b>4e</b> | 55%                |

<sup>a</sup> Isolated yield of diphenylamine based on nitrobenzene.

A 10 mL sealed tube was charged with Pd(OAc)<sub>2</sub> (0.01 mmol, 5 mol%), ligands (0.02 mmol, 10 mol%). The reaction vessel was purged with argon for three times and was added nitrobenzene (**W**, 0.2 mmol), cyclohexanone (**X**, 0.4 mmol) and NMP (0.3 mL) by syringe. The sealed vessel was stirred at 150 °C for 24 h. After cooling to room temperature, the volatiles were removed under vacuum and the residue was purified by column chromatography (silica gel, petroleum ether/ethyl acetate = 98:2) to give the corresponding product **Y**.

## 6. Characterization data of products

### 6-methoxy-2, 2'-biquinoline (**4a**)<sup>[2]</sup>

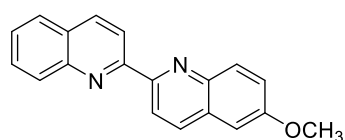

$^1\text{H}$  NMR (400 MHz,  $\text{CDCl}_3$ , ppm)  $\delta$  8.80 (dd,  $J = 8.4, 2.0$  Hz, 2H), 8.31 (d,  $J = 8.8$  Hz, 1H), 8.22 (d,  $J = 8.4$  Hz, 2H), 8.12 (d,  $J = 9.2$  Hz, 1H), 7.87 (d,  $J = 7.6$  Hz, 1H), 7.77-7.73 (m, 1H), 7.56 (t,  $J = 7.4$  Hz, 1H), 7.41 (dd,  $J = 9.2, 2.8$  Hz, 1H), 7.14 (d,  $J = 2.4$  Hz, 1H), 3.97 (s, 3H);  $^{13}\text{C}$  NMR (100 MHz,  $\text{CDCl}_3$ , ppm)  $\delta$  158.2, 156.4, 154.0, 147.9, 143.9, 136.7, 135.5, 131.3, 129.8, 129.5, 129.5, 128.3, 127.6, 126.7, 122.3, 119.7, 119.2, 105.1, 55.6; HRMS (maldi,  $m/z$ ): calcd. for  $\text{C}_{19}\text{H}_{15}\text{N}_2\text{O}$   $[\text{M}+\text{H}]^+$  287.1184, found 287.1176.

#### 8-methyl-2, 2'-biquinoline (4b)

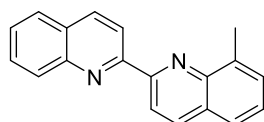

The reaction was conducted with *o*-toluidine (**1b**, 42.7  $\mu\text{L}$ , 0.4 mmol) and 2-methylquinoline (**2a**, 27.1  $\mu\text{L}$ , 0.2 mmol). The residue was purified by column chromatography on silica gel (petroleum ether/EtOAc = 5:1 to 2:1) afforded the product **4b** as yellow solid (41.1 mg, 76%), mp 114.8-118.8  $^\circ\text{C}$ .

$^1\text{H}$  NMR (400 MHz,  $\text{CDCl}_3$ , ppm)  $\delta$  8.92 (d,  $J = 8.4$  Hz, 1H), 8.85 (d,  $J = 8.4$  Hz, 1H), 8.31 - 8.27 (m, 2H), 8.22 (d,  $J = 8.4$  Hz, 1H), 7.87 (d,  $J = 8.0$  Hz, 1H), 7.77-7.69 (m, 2H), 7.60-7.54 (m, 2H), 7.45 (t,  $J = 7.4$  Hz, 1H), 2.96 (s, 3H);  $^{13}\text{C}$  NMR (100 MHz,  $\text{CDCl}_3$ , ppm)  $\delta$  156.6, 154.7, 147.9, 146.8, 137.8, 136.9, 136.6, 129.8, 129.6, 129.4, 128.4, 128.4, 127.6, 126.8, 126.7, 125.6, 119.5, 118.8, 17.9; HRMS (maldi,  $m/z$ ): calcd. for  $\text{C}_{19}\text{H}_{15}\text{N}_2$   $[\text{M}+\text{H}]^+$  271.1235, found 271.1236.

#### 7-methyl-2, 2'-biquinoline (4c)

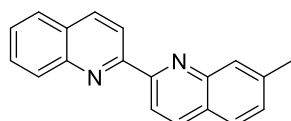

The reaction was conducted with *m*-toluidine (**1c**, 42.9  $\mu\text{L}$ , 0.4 mmol) and 2-methylquinoline (**2a**, 27.1  $\mu\text{L}$ , 0.2 mmol). The residue was purified by column chromatography on silica gel (petroleum

ether/EtOAc = 5:1 to 2:1) afforded the product **4c** as yellow solid (39.4 mg, 73%), mp 136.5-139.1 °C.

<sup>1</sup>H NMR (400 MHz, CDCl<sub>3</sub>, ppm) δ 8.83 (d, *J* = 8.8 Hz, 1H), 8.77 (d, *J* = 8.4 Hz, 1H), 8.33 (d, *J* = 8.4 Hz, 1H), 8.29 (d, *J* = 8.8 Hz, 1H), 8.23 (d, *J* = 8.8 Hz, 1H), 8.02 (s, 1H), 7.89 (d, *J* = 8.0 Hz, 1H), 7.79-7.74 (m, 2H), 7.58 (t, *J* = 7.4 Hz, 1H), 7.42 (d, *J* = 8.4 Hz, 1H), 2.61 (s, 3H); <sup>13</sup>C NMR (100 MHz, CDCl<sub>3</sub>, ppm) δ 156.4, 156.2, 148.1, 147.9, 139.8, 136.7, 136.4, 129.9, 129.5, 129.2, 128.9, 128.4, 127.6, 127.3, 126.9, 126.5, 119.4, 118.6, 21.9; HRMS (maldi, *m/z*): calcd. for C<sub>19</sub>H<sub>15</sub>N<sub>2</sub> [M+H]<sup>+</sup> 271.1235, found 271.1232.

#### 6-methyl-2, 2'-biquinoline (4d)

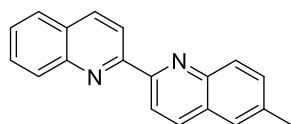

The reaction was conducted with *p*-toluidine (**1d**, 42.9 mg, 0.4 mmol) and 2-methylquinoline (**2a**, 27.1 μL, 0.2 mmol). The residue was purified by column chromatography on silica gel (petroleum ether/EtOAc = 5:1 to 2:1) afforded the product **4d** as yellow solid (36.7 mg, 68%), mp 198.4-202.3 °C.

<sup>1</sup>H NMR (400 MHz, CDCl<sub>3</sub>, ppm) δ 8.83-8.79 (m, 2H), 8.32 (d, *J* = 8.4 Hz, 1H), 8.25-8.22 (m, 2H), 8.12 (d, *J* = 8.4 Hz, 1H), 7.88 (d, *J* = 8.0 Hz, 1H), 7.78-7.74 (m, 1H), 7.65 (s, 1H), 7.61-7.56 (m, 2H), 2.58 (s, 3H); <sup>13</sup>C NMR (100 MHz, CDCl<sub>3</sub>, ppm) δ 156.4, 155.4, 147.9, 146.5, 137.0, 136.7, 136.1, 131.9, 129.9, 129.6, 129.5, 128.5, 128.4, 127.6, 126.8, 126.6, 119.4, 119.4, 21.7; HRMS (maldi, *m/z*): calcd. for C<sub>19</sub>H<sub>14</sub>N<sub>2</sub>Na [M+Na]<sup>+</sup> 293.1055, found 293.1056.

#### 6, 8-dimethyl-2, 2'-biquinoline (4e)

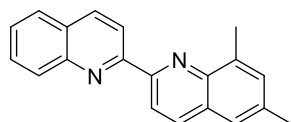

The reaction was conducted with 2,4-dimethylaniline (**1e**, 49.5  $\mu\text{L}$ , 0.4 mmol) and 2-methylquinoline (**2a**, 27.1  $\mu\text{L}$ , 0.2 mmol). The residue was purified by column chromatography on silica gel (petroleum ether/EtOAc = 5:1 to 2:1) afforded the product **4e** as red solid (23.9 mg, 42%), mp 122.4-125.3  $^{\circ}\text{C}$ .

$^1\text{H}$  NMR (400 MHz,  $\text{CDCl}_3$ , ppm)  $\delta$  8.92 (d,  $J = 8.4$  Hz, 1H), 8.81 (d,  $J = 8.4$  Hz, 1H), 8.30 (d,  $J = 8.8$  Hz, 1H), 8.21 (t,  $J = 8.0$  Hz, 2H), 7.88 (d,  $J = 7.6$  Hz, 1H), 7.77-7.73 (m, 1H), 7.58-7.55 (m, 1H), 7.48 (s, 1H), 7.45 (s, 1H), 2.92 (s, 3H), 2.52 (s, 3H);  $^{13}\text{C}$  NMR (100 MHz,  $\text{CDCl}_3$ , ppm)  $\delta$  156.8, 153.9, 147.9, 145.4, 137.4, 136.6, 136.5, 136.2, 132.0, 129.8, 129.4, 128.5, 128.4, 127.6, 126.7, 124.5, 119.5, 118.9, 21.7, 17.8; HRMS (maldi, m/z): calcd. for  $\text{C}_{20}\text{H}_{16}\text{N}_2\text{Na}$   $[\text{M}+\text{Na}]^+$  307.1211, found 307.1213.

#### 6-phenyl-2, 2'-biquinoline (**4f**)

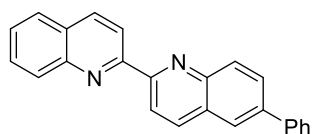

The reaction was conducted with [1,1'-biphenyl]-4-amine (**1f**, 67.7 mg, 0.4 mmol) and 2-methylquinoline (**2a**, 27.1  $\mu\text{L}$ , 0.2 mmol). The residue was purified by column chromatography on silica gel (petroleum ether/EtOAc = 5:1 to 2:1) afforded the product **4f** as yellow solid (45.8 mg, 69%), mp 251.5-255.2  $^{\circ}\text{C}$ .

$^1\text{H}$  NMR (400 MHz,  $\text{CDCl}_3$ , ppm)  $\delta$  8.80 (dd,  $J = 8.4, 5.2$  Hz, 2H), 8.33-8.27 (m, 2H), 8.23 (d,  $J = 8.4$  Hz, 1H), 8.17 (d,  $J = 8.4$  Hz, 1H), 8.01 (s, 1H), 7.97 (dd,  $J = 8.8, 1.8$  Hz, 1H), 7.83 (d,  $J = 8.4$  Hz, 1H), 7.71-7.69 (m, 3H), 7.52 (t,  $J = 7.4$  Hz, 1H), 7.46 (t,  $J = 7.4$  Hz, 2H), 7.36 (t,  $J = 7.2$  Hz, 1H);  $^{13}\text{C}$  NMR (100 MHz,  $\text{CDCl}_3$ , ppm)  $\delta$  156.2, 148.0, 147.3, 140.4, 139.7, 136.9, 136.8, 130.3, 129.9, 129.6, 129.3, 129.0, 128.6, 128.5, 127.8, 127.7, 127.4, 127.0, 125.4, 119.8, 119.4; HRMS (maldi, m/z): calcd. for  $\text{C}_{24}\text{H}_{16}\text{N}_2\text{Na}$   $[\text{M}+\text{Na}]^+$  355.1211, found 355.1215.

#### ethyl [2, 2'-biquinoline]-6-carboxylate (**4g**)

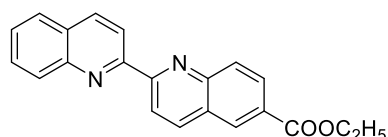

The reaction was conducted with ethyl 4-aminobenzoate (**1g**, 66.0 mg, 0.4 mmol) and 2-methylquinoline (**2a**, 27.1  $\mu$ L, 0.2 mmol). The residue was purified by column chromatography on silica gel (petroleum ether/EtOAc = 5:1 to 1:1) afforded the product **4g** as white solid (40.4 mg, 62%), mp 202.2-206.0  $^{\circ}$ C.

$^1\text{H}$  NMR (400 MHz,  $\text{CDCl}_3$ , ppm)  $\delta$  8.93 (d,  $J$  = 8.8 Hz, 1H), 8.86 (d,  $J$  = 8.8 Hz, 1H), 8.65 (d,  $J$  = 1.6 Hz, 1H), 8.43 (d,  $J$  = 8.8 Hz, 1H), 8.36 (d,  $J$  = 8.8 Hz, 2H), 8.25 (t,  $J$  = 8.6 Hz, 2H), 7.90 (d,  $J$  = 8.0 Hz, 1H), 7.80-7.76 (m, 1H), 7.62-7.59 (m, 1H), 4.48 (q,  $J$  = 7.1 Hz, 2H), 1.48 (t,  $J$  = 7.2 Hz, 3H);  $^{13}\text{C}$  NMR (100 MHz,  $\text{CDCl}_3$ , ppm)  $\delta$  166.2, 158.1, 155.7, 149.8, 147.9, 137.9, 136.9, 130.7, 130.1, 130.0, 129.7, 129.1, 128.6, 128.6, 127.7, 127.5, 127.2, 120.1, 119.4, 61.4, 14.4; HRMS (maldi,  $m/z$ ): calcd. for  $\text{C}_{21}\text{H}_{16}\text{N}_2\text{NaO}_2$  [ $\text{M}+\text{Na}$ ] $^+$  351.1109, found 351.1114.

#### 6-fluoro-2, 2'-biquinoline (**4h**)

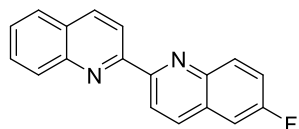

The reaction was conducted with 4-fluoroaniline (**1h**, 37.9  $\mu$ L, 0.4 mmol) and 2-methylquinoline (**2a**, 27.1  $\mu$ L, 0.2 mmol). The residue was purified by column chromatography on silica gel (petroleum ether/EtOAc = 5:1 to 2:1) afforded the product **4h** as yellow solid (13.2 mg, 24%), mp 232.7-236.8  $^{\circ}$ C.

$^1\text{H}$  NMR (400 MHz,  $\text{CDCl}_3$ , ppm)  $\delta$  8.80 (d,  $J$  = 8.8 Hz, 1H), 8.74 (d,  $J$  = 8.8 Hz, 1H), 8.26 (d,  $J$  = 8.4 Hz, 1H), 8.21 (d,  $J$  = 8.4 Hz, 1H), 8.17-8.14 (m, 2H), 7.82 (d,  $J$  = 8.0 Hz, 1H), 7.70 (t,  $J$  = 7.6 Hz, 1H), 7.52 (t,  $J$  = 7.4 Hz, 1H), 7.48-7.41 (m, 2H);  $^{13}\text{C}$  NMR (100 MHz,  $\text{CDCl}_3$ , ppm)  $\delta$  160.8 (d,  $J$  = 247.4 Hz), 155.9, 155.7, 147.9, 145.0, 136.8, 136.1 (d,  $J$  = 5.3 Hz), 132.4 (d,  $J$  = 9.1 Hz), 129.9, 129.6, 129.1 (d,  $J$  = 10.1 Hz), 128.5, 127.7, 127.0, 120.2, 119.8 (d,  $J$  = 25.6 Hz), 119.2, 110.7 (d,  $J$  = 21.5 Hz); HRMS (maldi,  $m/z$ ): calcd. for  $\text{C}_{18}\text{H}_{11}\text{FN}_2\text{Na}$  [ $\text{M}+\text{Na}$ ] $^+$  297.0804, found 297.0808.

#### 7-fluoro-2, 2'-biquinoline (4i)

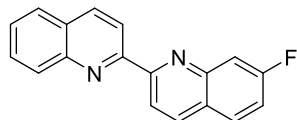

The reaction was conducted with 3-fluoroaniline (**1i**, 38.4  $\mu\text{L}$ , 0.4 mmol) and 2-methylquinoline (**2a**, 27.1  $\mu\text{L}$ , 0.2 mmol). The residue was purified by column chromatography on silica gel (petroleum ether/EtOAc = 5:1 to 2:1) afforded the product **4i** as yellow solid (48.8 mg, 89%), mp 160.4-162.5  $^{\circ}\text{C}$ .

$^1\text{H}$  NMR (400 MHz,  $\text{CDCl}_3$ , ppm)  $\delta$  8.74 (d,  $J = 8.8$  Hz, 2H), 8.26 (t,  $J = 8.0$  Hz, 2H), 8.16 (d,  $J = 8.4$  Hz, 1H), 7.83-7.76 (m, 3H), 7.69 (t,  $J = 7.8$  Hz, 1H), 7.52 (t,  $J = 7.6$  Hz, 1H), 7.30 (td,  $J = 8.8, 2.8$  Hz, 1H);  $^{13}\text{C}$  NMR (100 MHz,  $\text{CDCl}_3$ , ppm)  $\delta$  163.2 (d,  $J = 248.1$  Hz), 157.2, 155.9, 148.9 (d,  $J = 12.7$  Hz), 147.9, 136.8, 136.6, 129.9, 129.6, 129.5, 128.5, 127.7, 127.1, 125.4, 119.4, 118.8 (d,  $J = 2.5$  Hz), 117.4 (d,  $J = 25.3$  Hz), 113.4 (d,  $J = 20.1$  Hz); HRMS (maldi,  $m/z$ ): calcd. for  $\text{C}_{18}\text{H}_{12}\text{FN}_2$   $[\text{M}+\text{H}]^+$  275.0985, found 275.0984.

#### 6-chloro-2, 2'-biquinoline (4j)

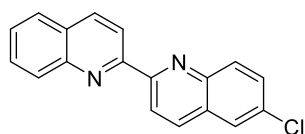

The reaction was conducted with 4-chloroaniline (**1j**, 51.0 mg, 0.4 mmol) and 2-methylquinoline (**2a**, 27.1  $\mu\text{L}$ , 0.2 mmol). The residue was purified by column chromatography on silica gel (petroleum ether/EtOAc = 5:1 to 2:1) afforded the product **4j** as yellow solid (9.9 mg, 17%), mp 194.3-198.2  $^{\circ}\text{C}$ .

$^1\text{H}$  NMR (400 MHz,  $\text{CDCl}_3$ , ppm)  $\delta$  8.88 (d,  $J = 8.4$  Hz, 1H), 8.81 (d,  $J = 8.4$  Hz, 1H), 8.34 (d,  $J = 8.8$  Hz, 1H), 8.23 (t,  $J = 8.0$  Hz, 2H), 8.16 (d,  $J = 8.8$  Hz, 1H), 7.90-7.87 (m, 2H), 7.79-7.75 (m, 1H), 7.69 (dd,  $J = 8.8, 2.0$  Hz, 1H), 7.61-7.57 (m, 1H);  $^{13}\text{C}$  NMR (100 MHz,  $\text{CDCl}_3$ , ppm)  $\delta$  156.4, 155.7, 147.9, 146.3, 136.9, 135.8, 132.7, 131.5, 130.5, 129.9, 129.7, 129.0, 128.5, 127.7,



127.1, 126.4, 120.3, 119.3; HRMS (maldi, m/z): calcd. for C<sub>18</sub>H<sub>11</sub>ClN<sub>2</sub>Na [M+Na]<sup>+</sup> 313.0508, found 313.0502.

#### 7-chloro-2, 2'-biquinoline (4k)

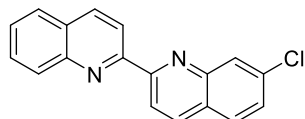

The reaction was conducted with 3-chloroaniline (**1k**, 42.3  $\mu$ L, 0.4 mmol) and 2-methylquinoline (**2a**, 27.1  $\mu$ L, 0.2 mmol). The residue was purified by column chromatography on silica gel (petroleum ether/EtOAc = 5:1 to 2:1) afforded the product **4k** as yellow solid (11.6 mg, 20%), mp 205.6-209.2 °C.

<sup>1</sup>H NMR (400 MHz, CDCl<sub>3</sub>, ppm)  $\delta$  8.76 (dd, *J* = 17.2, 8.4 Hz, 2H), 8.25 (dd, *J* = 14.0, 8.4 Hz, 2H), 8.17-8.15 (m, 2H), 7.82 (d, *J* = 8.0 Hz, 1H), 7.75 (d, *J* = 8.4 Hz, 1H), 7.72-7.68 (m, 1H), 7.54-7.51 (m, 1H), 7.46 (dd, *J* = 8.4, 1.6 Hz, 1H); <sup>13</sup>C NMR (100 MHz, CDCl<sub>3</sub>, ppm)  $\delta$  157.2, 155.8, 148.3, 147.9, 136.8, 136.5, 135.4, 130.0, 129.6, 128.9, 128.8, 128.5, 127.9, 127.7, 127.1, 126.8, 119.6, 119.3; HRMS (maldi, m/z): calcd. for C<sub>18</sub>H<sub>11</sub>ClN<sub>2</sub>Na [M+Na]<sup>+</sup> 313.0508, found 313.0513.

#### 6-bromo-2, 2'-biquinoline (4l)

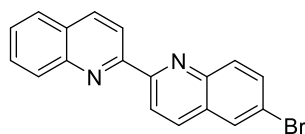

The reaction was conducted with 4-bromoaniline (**1l**, 83.4 mg, 0.4 mmol) and 2-methylquinoline (**2a**, 27.1  $\mu$ L, 0.2 mmol). The residue was purified by column chromatography on silica gel (petroleum ether/EtOAc = 5:1 to 2:1) afforded the product **4l** as yellow solid (13.4 mg, 20%), mp 285.0-288.2 °C.

<sup>1</sup>H NMR (400 MHz, CDCl<sub>3</sub>, ppm)  $\delta$  8.80 (d, *J* = 8.8 Hz, 1H), 8.73 (d, *J* = 8.4 Hz, 1H), 8.26 (d, *J* = 8.4 Hz, 1H), 8.17-8.14 (m, 2H), 8.02 (d, *J* = 8.8 Hz, 1H), 7.97 (s, 1H), 7.82 (d, *J* = 8.0 Hz, 1H), 7.76-7.68 (m, 2H), 7.52 (t, *J* = 7.6 Hz, 1H); <sup>13</sup>C NMR (100 MHz, CDCl<sub>3</sub>, ppm)  $\delta$  156.6, 155.8,

147.9, 146.5, 136.8, 135.7, 133.0, 131.6, 129.9, 129.7, 129.7, 129.5, 128.5, 127.7, 127.1, 120.8, 120.3, 119.3; HRMS (maldi, m/z): calcd. for C<sub>18</sub>H<sub>11</sub>BrN<sub>2</sub>Na [M+Na]<sup>+</sup> 357.0003, found 356.9992.

#### methyl [2, 2'-biquinoline]-6-carboxylate (**4m**)

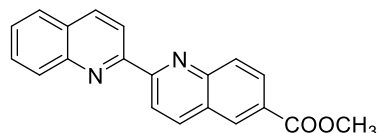

The reaction was conducted with aniline (**1m**, 36.4  $\mu$ L, 0.4 mmol) and methyl 2-methylquinoline-6-carboxylate (**2g**, 80.5 mg, 0.2 mmol). The residue was purified by column chromatography on silica gel (petroleum ether/EtOAc = 5:1 to 1:1) afforded the product **4m** as yellow solid (23.2 mg, 37%), mp 266.4-269.8 °C.

<sup>1</sup>H NMR (400 MHz, CDCl<sub>3</sub>, ppm)  $\delta$  8.86 (d,  $J$  = 8.8 Hz, 1H), 8.79 (d,  $J$  = 8.4 Hz, 1H), 8.59 (s, 1H), 8.36 (d,  $J$  = 8.8 Hz, 1H), 8.30-8.27 (m, 2H), 8.18 (t,  $J$  = 8.4 Hz, 2H), 7.84 (d,  $J$  = 8.0 Hz, 1H), 7.71 (t,  $J$  = 7.6 Hz, 1H), 7.54 (t,  $J$  = 7.4 Hz, 1H), 3.95 (s, 3H); <sup>13</sup>C NMR (100 MHz, CDCl<sub>3</sub>, ppm)  $\delta$  166.7, 158.2, 155.7, 149.8, 147.9, 138.0, 136.9, 130.8, 130.2, 130.0, 129.7, 129.1, 128.6, 128.3, 127.7, 127.6, 127.3, 120.2, 119.4, 52.4; HRMS (maldi, m/z): calcd. for C<sub>20</sub>H<sub>14</sub>N<sub>2</sub>O<sub>2</sub>Na [M+Na]<sup>+</sup> 337.0953, found 337.0953.

#### 6, 8'-dimethyl-2, 2'-biquinoline (**4n**)

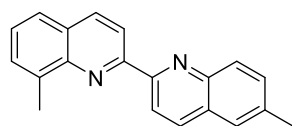

The reaction was conducted with *o*-toluidine (**1b**, 42.7  $\mu$ L, 0.4 mmol) and 2,6-dimethylquinoline (**2b**, 31.4 mg, 0.2 mmol). The residue was purified by column chromatography on silica gel (petroleum ether/EtOAc = 5:1 to 2:1) afforded the product **4n** as red solid (37.4 mg, 66%), mp 263.2-266.1 °C.

<sup>1</sup>H NMR (400 MHz, CDCl<sub>3</sub>, ppm)  $\delta$  8.89 (d,  $J$  = 8.4 Hz, 1H), 8.84 (d,  $J$  = 8.8 Hz, 1H), 8.29 (d,  $J$  = 8.8 Hz, 1H), 8.23 (d,  $J$  = 8.4 Hz, 1H), 8.12 (d,  $J$  = 8.8 Hz, 1H), 7.72 (d,  $J$  = 8.0 Hz, 1H), 7.65 (s, 1H), 7.61-7.57 (m, 2H), 7.46 (t,  $J$  = 7.6 Hz, 1H), 2.96 (s, 3H), 2.58 (s, 3H); <sup>13</sup>C NMR (100

MHz, CDCl<sub>3</sub>, ppm)  $\delta$  155.8, 154.9, 146.8, 146.5, 137.8, 136.9, 136.8, 135.9, 131.8, 129.6, 128.5, 128.3, 126.6, 126.6, 125.6, 119.5, 118.8, 21.7, 17.9; HRMS (maldi, m/z): calcd. for C<sub>20</sub>H<sub>16</sub>N<sub>2</sub>Na [M+Na]<sup>+</sup> 307.1211, found 307.1214.

#### 6-methoxy-8'-methyl-2, 2'-biquinoline (4o)

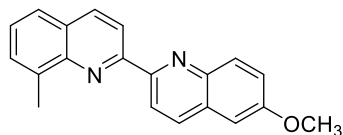

The reaction was conducted with *o*-toluidine (**1b**, 42.7  $\mu$ L, 0.4 mmol) and 6-methoxy-2-methylquinoline (**2c**, 34.6 mg, 0.2 mmol). The residue was purified by column chromatography on silica gel (petroleum ether/EtOAc = 5:1 to 1:1) afforded the product **4o** as red solid (32.5 mg, 54%), mp 175.3-178.6 °C.

<sup>1</sup>H NMR (400 MHz, CDCl<sub>3</sub>, ppm)  $\delta$  8.82 (d, *J* = 8.8 Hz, 1H), 8.74 (d, *J* = 8.8 Hz, 1H), 8.21 (d, *J* = 8.8 Hz, 1H), 8.14 (d, *J* = 8.8 Hz, 1H), 8.05 (d, *J* = 9.2 Hz, 1H), 7.64 (d, *J* = 8.0 Hz, 1H), 7.53 (d, *J* = 6.8 Hz, 1H), 7.40-7.32 (m, 2H), 7.08 (d, *J* = 2.4 Hz, 1H), 3.91 (s, 3H), 2.89 (s, 3H); <sup>13</sup>C NMR (100 MHz, CDCl<sub>3</sub>, ppm)  $\delta$  158.1, 154.9, 154.4, 146.8, 143.9, 137.7, 136.9, 135.3, 131.3, 129.5, 129.5, 128.3, 126.5, 125.6, 122.2, 119.8, 118.7, 105.2, 55.6, 17.9; HRMS (maldi, m/z): calcd. for C<sub>20</sub>H<sub>16</sub>N<sub>2</sub>NaO [M+Na]<sup>+</sup> 323.1160, found 323.1166.

#### 6-fluoro-8'-methyl-2, 2'-biquinoline (4p)

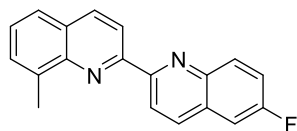

The reaction was conducted with *o*-toluidine (**1b**, 42.7  $\mu$ L, 0.4 mmol) and 6-fluoro-2-methylquinoline (**2d**, 32.2 mg, 0.2 mmol). The residue was purified by column chromatography on silica gel (petroleum ether/EtOAc = 5:1 to 2:1) afforded the product **4p** as white solid (14.4 mg, 27%), mp 205.1-208.4 °C.

<sup>1</sup>H NMR (400 MHz, CDCl<sub>3</sub>, ppm)  $\delta$  8.95 (d, *J* = 8.4 Hz, 1H), 8.81 (d, *J* = 8.4 Hz, 1H), 8.30 - 8.20 (m, 3H), 7.72 (d, *J* = 8.0 Hz, 1H), 7.61 (d, *J* = 6.8 Hz, 1H), 7.54-7.44 (m, 3H), 2.96 (s, 3H);

$^{13}\text{C}$  NMR (100 MHz,  $\text{CDCl}_3$ , ppm)  $\delta$  160.7 (d,  $J = 247.0$  Hz), 156.1, 154.4, 146.8, 145.0, 137.8, 137.0, 135.9 (d,  $J = 5.2$  Hz), 132.3 (d,  $J = 9.2$  Hz), 129.7, 129.1 (d,  $J = 10.0$  Hz), 128.4, 126.8, 125.6, 120.3, 119.6 (d,  $J = 25.6$  Hz), 118.7, 110.7 (d,  $J = 21.5$  Hz), 17.9; HRMS (maldi,  $m/z$ ): calcd. for  $\text{C}_{19}\text{H}_{13}\text{FN}_2\text{Na}$   $[\text{M}+\text{Na}]^+$  311.0960, found 311.0966.

#### 6-bromo-8'-methyl-2, 2'-biquinoline (4q)

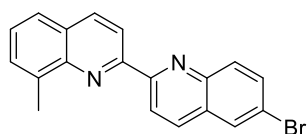

The reaction was conducted with *o*-toluidine (**1b**, 42.7  $\mu\text{L}$ , 0.4 mmol) and 6-bromo-2-methylquinoline (**2e**, 44.4 mg, 0.2 mmol). The residue was purified by column chromatography on silica gel (petroleum ether/EtOAc = 5:1 to 2:1) afforded the product **4q** as yellow solid (19.2 mg, 28%), mp 260.3-263.7  $^\circ\text{C}$ .

$^1\text{H}$  NMR (400 MHz,  $\text{CDCl}_3$ , ppm)  $\delta$  8.88 (d,  $J = 8.8$  Hz, 1H), 8.74 (d,  $J = 8.8$  Hz, 1H), 8.22 (d,  $J = 8.8$  Hz, 1H), 8.14 (d,  $J = 8.4$  Hz, 1H), 8.01 (d,  $J = 8.8$  Hz, 1H), 7.97 (d,  $J = 2.0$  Hz, 1H), 7.74 (dd,  $J = 8.8, 2.0$  Hz, 1H), 7.65 (d,  $J = 8.0$  Hz, 1H), 7.54 (d,  $J = 6.8$  Hz, 1H), 7.40 (t,  $J = 7.6$  Hz, 1H), 2.88 (s, 3H);  $^{13}\text{C}$  NMR (100 MHz,  $\text{CDCl}_3$ , ppm)  $\delta$  157.0, 154.3, 146.8, 146.5, 137.9, 137.0, 135.5, 135.5, 132.9, 131.6, 129.7, 129.5, 128.5, 126.9, 125.6, 120.7, 120.4, 118.7, 17.9; HRMS (maldi,  $m/z$ ): calcd. for  $\text{C}_{19}\text{H}_{13}\text{BrN}_2\text{Na}$   $[\text{M}+\text{H}]^+$  349.0340, found 349.0337.

#### methyl 8'-methyl-[2, 2'-biquinoline]-6-carboxylate (4r)

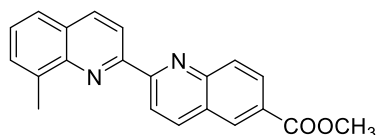

The reaction was conducted with *o*-toluidine (**1b**, 42.7  $\mu\text{L}$ , 0.4 mmol) and methyl 2-methylquinoline-6-carboxylate (**2g**, 40.2 mg, 0.2 mmol). The residue was purified by column chromatography on silica gel (petroleum ether/EtOAc = 5:1 to 1:1) afforded the product **4r** as white solid (29.9 mg, 46%), mp 228.5-231.3  $^\circ\text{C}$ .

$^1\text{H}$  NMR (400 MHz,  $\text{CDCl}_3$ , ppm)  $\delta$  8.92 (d,  $J = 8.8$  Hz, 1H), 8.78 (d,  $J = 8.4$  Hz, 1H), 8.56 (s, 1H), 8.33 (d,  $J = 8.8$  Hz, 1H), 8.24 (t,  $J = 9.2$  Hz, 2H), 8.17 (d,  $J = 8.8$  Hz, 1H), 7.65 (d,  $J = 8.4$  Hz, 1H), 7.54 (d,  $J = 6.8$  Hz, 1H), 7.41 (t,  $J = 7.6$  Hz, 1H), 3.94 (s, 3H), 2.88 (s, 3H);  $^{13}\text{C}$  NMR (100 MHz,  $\text{CDCl}_3$ , ppm)  $\delta$  166.7, 158.6, 154.2, 149.8, 146.8, 137.9, 137.8, 137.1, 130.8, 130.1, 129.7, 129.0, 128.6, 128.1, 127.5, 127.1, 125.6, 120.3, 118.9, 52.4, 17.9; HRMS (maldi,  $m/z$ ): calcd. for  $\text{C}_{21}\text{H}_{16}\text{N}_2\text{NaO}_2$   $[\text{M}+\text{Na}]^+$  351.1109, found 351.1114.

#### 6, 7'-dimethyl-2, 2'-biquinoline (4s)

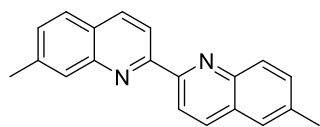

The reaction was conducted with *m*-toluidine (**1c**, 42.9  $\mu\text{L}$ , 0.4 mmol) and 2,6-dimethylquinoline (**2b**, 31.4 mg, 0.2 mmol). The residue was purified by column chromatography on silica gel (petroleum ether/EtOAc = 5:1 to 2:1) afforded the product **4s** as red solid (35.3 mg, 62%), mp 258.6-263.7  $^\circ\text{C}$ .

$^1\text{H}$  NMR (400 MHz,  $\text{CDCl}_3$ , ppm)  $\delta$  8.69 (dd,  $J = 12.0, 8.4$  Hz, 2H), 8.17 (dd,  $J = 15.6, 8.8$  Hz, 2H), 8.04 (d,  $J = 8.4$  Hz, 1H), 7.93 (s, 1H), 7.69 (d,  $J = 8.4$  Hz, 1H), 7.56 (s, 1H), 7.51 (d,  $J = 8.8$  Hz, 1H), 7.33 (d,  $J = 8.0$  Hz, 1H), 2.53 (s, 3H), 2.50 (s, 3H);  $^{13}\text{C}$  NMR (100 MHz,  $\text{CDCl}_3$ , ppm)  $\delta$  156.3, 155.6, 148.2, 146.5, 139.7, 136.9, 136.4, 136.0, 131.8, 129.6, 129.1, 128.9, 128.4, 127.3, 126.5, 126.4, 119.4, 118.6, 21.9, 21.7; HRMS (maldi,  $m/z$ ): calcd. for  $\text{C}_{20}\text{H}_{16}\text{N}_2\text{Na}$   $[\text{M}+\text{Na}]^+$  307.1211, found 307.1219.

#### 6-methoxy-7'-methyl-2, 2'-biquinoline (4t)

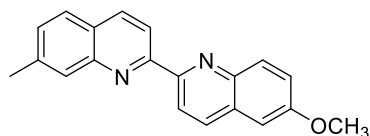

The reaction was conducted with *m*-toluidine (**1c**, 42.9  $\mu\text{L}$ , 0.4 mmol) and 6-methoxy-2-methylquinoline (**2c**, 34.6 mg, 0.2 mmol). The residue was purified by column

chromatography on silica gel (petroleum ether/EtOAc = 5:1 to 2:1) afforded the product **4t** as yellow solid (51.2 mg, 85%), mp 245.4-248.3 °C.

<sup>1</sup>H NMR (400 MHz, CDCl<sub>3</sub>, ppm) δ 8.70 (d, *J* = 8.4 Hz, 1H), 8.65 (d, *J* = 8.8 Hz, 1H), 8.18 (d, *J* = 8.8 Hz, 1H), 8.13 (d, *J* = 8.4 Hz, 1H), 8.04 (d, *J* = 8.8 Hz, 1H), 7.92 (s, 1H), 7.69 (d, *J* = 8.0 Hz, 1H), 7.34-7.31 (m, 2H), 7.07 (d, *J* = 2.4 Hz, 1H), 3.89 (s, 3H), 2.53 (s, 3H); <sup>13</sup>C NMR (100 MHz, CDCl<sub>3</sub>, ppm) δ 158.2, 156.4, 154.2, 148.2, 144.0, 139.7, 136.4, 135.4, 131.4, 129.5, 129.0, 128.8, 127.3, 126.4, 122.3, 119.7, 118.4, 105.2, 55.6, 21.9; HRMS (maldi, *m/z*): calcd. for C<sub>20</sub>H<sub>16</sub>N<sub>2</sub>NaO [M+Na]<sup>+</sup> 323.1160, found 323.1170.

#### 6-bromo-7'-methyl-2, 2'-biquinoline (**4u**)

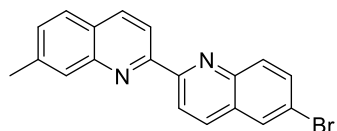

The reaction was conducted with *m*-toluidine (**1c**, 42.9 μL, 0.4 mmol) and 6-bromo-2-methylquinoline (**2e**, 44.4 mg, 0.2 mmol). The residue was purified by column chromatography on silica gel (petroleum ether/EtOAc = 5:1 to 2:1) afforded the product **4u** as yellow solid (57.3 mg, 82%), mp 260.2-264.0 °C.

<sup>1</sup>H NMR (400 MHz, CDCl<sub>3</sub>, ppm) δ 8.78 (d, *J* = 8.4 Hz, 1H), 8.66 (d, *J* = 8.8 Hz, 1H), 8.20 (d, *J* = 8.4 Hz, 1H), 8.15 (d, *J* = 8.4 Hz, 1H), 8.02-7.94 (m, 3H), 7.75-7.70 (m, 2H), 7.35 (d, *J* = 7.6 Hz, 1H), 2.54 (s, 3H); <sup>13</sup>C NMR (100 MHz, CDCl<sub>3</sub>, ppm) δ 156.8, 155.7, 148.2, 146.5, 140.0, 136.5, 135.6, 133.0, 131.6, 129.7, 129.5, 129.4, 128.9, 127.3, 126.6, 120.7, 120.3, 118.5, 21.9; HRMS (maldi, *m/z*): calcd. for C<sub>19</sub>H<sub>14</sub>BrN<sub>2</sub> [M+H]<sup>+</sup> 349.0340, found 349.0336.

#### 6-methoxy-6'-methyl-2, 2'-biquinoline (**4v**)

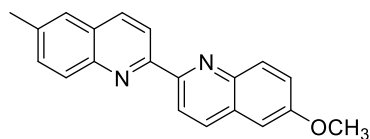

The reaction was conducted with *p*-toluidine (**1d**, 42.9 mg, 0.4 mmol) and 6-methoxy-2-methylquinoline (**2c**, 34.6 mg, 0.2 mmol). The residue was purified by column

chromatography on silica gel (petroleum ether/EtOAc = 5:1 to 2:1) afforded the product **4v** as yellow solid (43.7 mg, 73%), mp 249.3-253.2 °C.

<sup>1</sup>H NMR (400 MHz, CDCl<sub>3</sub>, ppm) δ 8.69 (t, *J* = 8.4 Hz, 2H), 8.15 (dd, *J* = 8.8, 3.2 Hz, 2H), 8.04 (dd, *J* = 9.2, 4.8 Hz, 2H), 7.57 (s, 1H), 7.51 (d, *J* = 8.4 Hz, 1H), 7.33 (dd, *J* = 9.2, 2.8 Hz, 1H), 7.07 (d, *J* = 2.8 Hz, 1H), 3.90 (s, 3H), 2.50 (s, 3H); <sup>13</sup>C NMR (100 MHz, CDCl<sub>3</sub>, ppm) δ 158.1, 155.6, 154.2, 146.5, 144.0, 136.7, 136.0, 135.4, 131.8, 131.3, 129.5, 129.4, 128.3, 126.6, 122.2, 119.7, 119.2, 105.2, 55.6, 21.7; HRMS (maldi, *m/z*): calcd. for C<sub>20</sub>H<sub>16</sub>N<sub>2</sub>NaO [M+Na]<sup>+</sup> 323.1160, found 323.1170.

#### 6-fluoro-6'-methyl-2, 2'-biquinoline (**4w**)

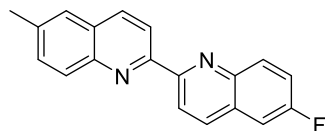

The reaction was conducted with *p*-toluidine (**1d**, 42.9 mg, 0.4 mmol) and 6-fluoro-2-methylquinoline (**2d**, 32.2 mg, 0.2 mmol). The residue was purified by column chromatography on silica gel (petroleum ether/EtOAc = 5:1 to 2:1) afforded the product **4w** as yellow solid (31.2 mg, 54%), mp 263.7-266.0 °C.

<sup>1</sup>H NMR (400 MHz, CDCl<sub>3</sub>, ppm) δ 8.78 (d, *J* = 8.8 Hz, 1H), 8.69 (d, *J* = 8.8 Hz, 1H), 8.21-8.13 (m, 3H), 8.04 (d, *J* = 8.4 Hz, 1H), 7.58 (s, 1H), 7.53 (d, *J* = 8.8 Hz, 1H), 7.48-7.41 (m, 2H), 2.51 (s, 3H); <sup>13</sup>C NMR (100 MHz, CDCl<sub>3</sub>, ppm) δ 160.7 (d, *J* = 247.1 Hz), 155.9, 155.1, 146.5, 145.0, 137.0, 136.1, 136.0 (d, *J* = 5.3 Hz), 132.3 (d, *J* = 9.1 Hz), 131.9, 129.6, 129.0 (d, *J* = 10.1 Hz), 128.5, 126.6, 120.1, 119.7 (d, *J* = 25.6 Hz), 119.2, 110.7 (d, *J* = 21.6 Hz), 21.7; HRMS (maldi, *m/z*): calcd. for C<sub>19</sub>H<sub>13</sub>FN<sub>2</sub>Na [M+Na]<sup>+</sup> 311.0960, found 311.0965.

#### methyl 6'-methyl-[2, 2'-biquinoline]-6-carboxylate (**4x**)

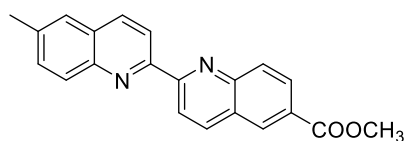

The reaction was conducted with *p*-toluidine (**1d**, 42.9 mg, 0.4 mmol) and methyl 2-methylquinoline-6-carboxylate (**2g**, 40.2 mg, 0.2 mmol). The residue was purified by column chromatography on silica gel (petroleum ether/EtOAc = 5:1 to 1:1) afforded the product **4x** as red solid (33.0 mg, 50%), mp 281.6-284.3 °C.

<sup>1</sup>H NMR (400 MHz, CDCl<sub>3</sub>, ppm) δ 8.83 (d, *J* = 8.8 Hz, 1H), 8.73 (d, *J* = 8.8 Hz, 1H), 8.57 (d, *J* = 1.6 Hz, 1H), 8.34 (d, *J* = 8.4 Hz, 1H), 8.28-8.25 (m, 1H), 8.18 (d, *J* = 7.6 Hz, 2H), 8.05 (d, *J* = 8.8 Hz, 1H), 7.59 (s, 1H), 7.54 (d, *J* = 8.8 Hz, 1H), 3.95 (s, 3H), 2.51 (s, 3H); <sup>13</sup>C NMR (100 MHz, CDCl<sub>3</sub>, ppm) δ 166.7, 158.4, 154.8, 149.8, 146.5, 137.9, 137.3, 136.2, 132.0, 130.8, 130.1, 129.7, 129.0, 128.6, 128.2, 127.5, 126.6, 120.2, 119.4, 52.4, 21.7; HRMS (maldi, *m/z*): calcd. for C<sub>21</sub>H<sub>16</sub>N<sub>2</sub>NaO<sub>2</sub> [M+Na]<sup>+</sup> 351.1109, found 351.1108.

#### 6'-methoxy-6, 8-dimethyl-2, 2'-biquinoline (**4y**)

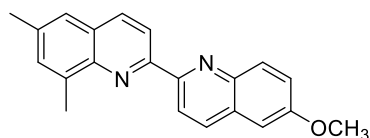

The reaction was conducted with 2,4-dimethylaniline (**1e**, 49.5 μL, 0.4 mmol) and 6-methoxy-2-methylquinoline (**2c**, 34.6 mg, 0.2 mmol). The residue was purified by column chromatography on silica gel (petroleum ether/EtOAc = 5:1 to 2:1) afforded the product **4y** as yellow solid (25.5 mg, 41%), mp 255.8-259.4 °C.

<sup>1</sup>H NMR (400 MHz, CDCl<sub>3</sub>, ppm) δ 8.87 (d, *J* = 8.4 Hz, 1H), 8.76 (d, *J* = 8.4 Hz, 1H), 8.19 (t, *J* = 7.6 Hz, 2H), 8.11 (d, *J* = 9.2 Hz, 1H), 7.47-7.38 (m, 3H), 7.14 (d, *J* = 2.4 Hz, 1H), 3.97 (s, 3H), 2.92 (s, 3H), 2.52 (s, 3H); <sup>13</sup>C NMR (100 MHz, CDCl<sub>3</sub>, ppm) δ 158.1, 154.6, 154.1, 145.4, 143.9, 137.3, 136.4, 136.2, 135.3, 131.9, 131.3, 129.4, 128.3, 124.5, 122.1, 119.8, 118.7, 105.2, 55.6, 21.7, 17.8; HRMS (maldi, *m/z*): calcd. for C<sub>21</sub>H<sub>18</sub>N<sub>2</sub>NaO [M+Na]<sup>+</sup> 337.1317, found 337.1321.

#### methyl 6', 8'-dimethyl-[2, 2'-biquinoline]-6-carboxylate (**4z**)



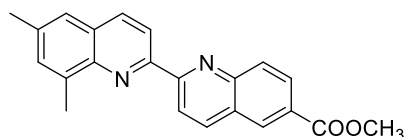

The reaction was conducted with 2,4-dimethylaniline (**1e**, 49.5  $\mu\text{L}$ , 0.4 mmol) and 2-methylquinoline-6-carboxylate (**2g**, 40.2 mg, 0.2 mmol). The residue was purified by column chromatography on silica gel (petroleum ether/EtOAc = 5:1 to 1:1) afforded the product **4y** as white solid (23.9 mg, 35%), mp 280.1-283.0  $^{\circ}\text{C}$

$^1\text{H}$  NMR (400 MHz,  $\text{CDCl}_3$ , ppm)  $\delta$  8.99 (d,  $J = 8.4$  Hz, 1H), 8.81 (d,  $J = 8.4$  Hz, 1H), 8.64 (s, 1H), 8.40 (d,  $J = 8.8$  Hz, 1H), 8.33 (d,  $J = 8.4$  Hz, 1H), 8.23 (t,  $J = 9.6$  Hz, 2H), 7.49 (s, 1H), 7.46 (s, 1H), 4.02 (s, 3H), 2.92 (s, 3H), 2.53 (s, 3H);  $^{13}\text{C}$  NMR (100 MHz,  $\text{CDCl}_3$ , ppm)  $\delta$  166.8, 158.8, 153.4, 149.8, 145.5, 137.7, 137.5, 137.0, 136.4, 132.1, 130.8, 130.1, 129.0, 128.7, 128.0, 127.5, 124.5, 120.3, 118.9, 52.4, 21.7, 17.8; HRMS (maldi,  $m/z$ ): calcd. for  $\text{C}_{22}\text{H}_{18}\text{N}_2\text{NaO}_2$   $[\text{M}+\text{Na}]^+$  365.1266, found 365.1261.

### 2, 2'-biquinoline (**5a**)<sup>[3]</sup>

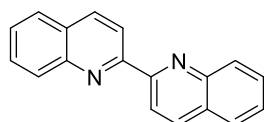

$^1\text{H}$  NMR (400 MHz,  $\text{CDCl}_3$ , ppm)  $\delta$  8.76 (d,  $J = 8.8$  Hz, 2H), 8.24 (d,  $J = 8.4$  Hz, 2H), 8.15 (d,  $J = 8.4$  Hz, 2H), 7.79 (d,  $J = 8.0$  Hz, 2H), 7.67 (t,  $J = 7.6$  Hz, 2H), 7.49 (t,  $J = 7.4$  Hz, 2H);  $^{13}\text{C}$  NMR (100 MHz,  $\text{CDCl}_3$ , ppm)  $\delta$  156.2, 147.9, 136.7, 129.9, 129.5, 128.4, 127.6, 126.9, 119.4; HRMS (maldi,  $m/z$ ): calcd. for  $\text{C}_{18}\text{H}_{13}\text{N}_2$   $[\text{M}+\text{H}]^+$  257.1079, found 257.1071.

### 6, 6'-dimethoxy-2, 2'-biquinoline (**5b**)<sup>[2]</sup>

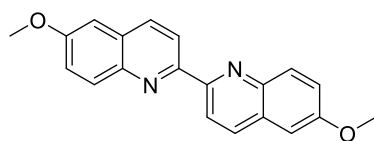

The reaction was conducted with 4-methoxyaniline (**1a**, 24.6 mg, 0.2 mmol) and 1,4-dioxane (1.5 mL). The residue was purified by column chromatography on silica gel (petroleum ether/EtOAc = 5:1 to 2:1) afforded the product **5b** as yellow solid (18.7 mg, 59%).

$^1\text{H}$  NMR (400 MHz,  $\text{CDCl}_3$ , ppm)  $\delta$  8.68 (d,  $J = 8.8$  Hz, 2H), 8.14 (d,  $J = 8.8$  Hz, 2H), 8.04 (d,  $J = 9.2$  Hz, 2H), 7.33 (dd,  $J = 9.2, 2.8$  Hz, 2H), 7.08 (d,  $J = 2.4$  Hz, 2H), 3.90 (s, 6H);  $^{13}\text{C}$  NMR (100 MHz,  $\text{CDCl}_3$ , ppm)  $\delta$  158.1, 154.2, 144.0, 135.4, 131.3, 129.4, 122.2, 119.5, 105.2, 55.6; HRMS (maldi,  $m/z$ ): calcd. for  $\text{C}_{20}\text{H}_{17}\text{N}_2\text{O}_2$   $[\text{M}+\text{H}]^+$  317.1290, found 317.1277.

### 6, 6'-dimethyl-2, 2'-biquinoline (**5c**)<sup>[3]</sup>

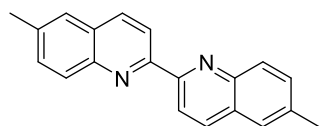

The reaction was conducted with *p*-toluidine (**1d**, 21.4 mg, 0.2 mmol) and 1,4-dioxane (1.5 mL). The residue was purified by column chromatography on silica gel (petroleum ether/EtOAc = 5:1 to 2:1) afforded the product **5c** as white solid (23.0 mg, 81%).

$^1\text{H}$  NMR (400 MHz,  $\text{CDCl}_3$ , ppm)  $\delta$  8.70 (d,  $J = 8.8$  Hz, 2H), 8.15 (d,  $J = 8.4$  Hz, 2H), 8.04 (d,  $J = 8.4$  Hz, 2H), 7.56 (s, 2H), 7.51 (d,  $J = 8.4$  Hz, 2H), 2.50 (s, 6H);  $^{13}\text{C}$  NMR (100 MHz,  $\text{CDCl}_3$ , ppm)  $\delta$  155.6, 146.5, 136.8, 136.0, 131.8, 129.5, 128.4, 126.5, 119.4, 21.7; HRMS (maldi,  $m/z$ ): calcd. for  $\text{C}_{20}\text{H}_{17}\text{N}_2$   $[\text{M}+\text{H}]^+$  285.1392, found 285.1382.

### 8, 8'-dimethyl-2, 2'-biquinoline (**5d**)<sup>[2]</sup>

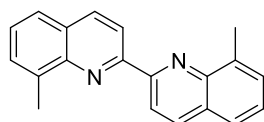

The reaction was conducted with *o*-toluidine (**1b**, 21.3  $\mu\text{L}$ , 0.2 mmol) and 1,4-dioxane (1.5 mL). The residue was purified by column chromatography on silica gel (petroleum ether/EtOAc = 5:1 to 2:1) afforded the product **5d** as yellow solid (13.9 mg, 49%).

$^1\text{H}$  NMR (400 MHz,  $\text{CDCl}_3$ , ppm)  $\delta$  8.86 (d,  $J = 8.4$  Hz, 2H), 8.21 (d,  $J = 8.8$  Hz, 2H), 7.65 (d,  $J = 8.0$  Hz, 2H), 7.53 (d,  $J = 6.4$  Hz, 2H), 7.39 (t,  $J = 7.6$  Hz, 2H), 2.90 (s, 6H);  $^{13}\text{C}$  NMR (100 MHz,  $\text{CDCl}_3$ , ppm)  $\delta$  155.1, 146.8, 137.8, 136.8, 129.5, 128.3, 126.6, 125.6, 118.9, 17.9; HRMS (maldi, m/z): calcd. for  $\text{C}_{20}\text{H}_{17}\text{N}_2$   $[\text{M}+\text{H}]^+$  285.1392, found 285.1388.

### 7, 7'-difluoro-2, 2'-biquinoline (5e)

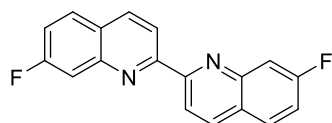

The reaction was conducted with 3-fluoroaniline (**1i**, 19.2  $\mu\text{L}$ , 0.2 mmol) and 1,4-dioxane (1.5 mL). The residue was purified by column chromatography on silica gel (petroleum ether/EtOAc = 5:1 to 2:1) afforded the product **5e** as red solid (9.9 mg, 34%), mp 246.5-249.3  $^\circ\text{C}$

$^1\text{H}$  NMR (400 MHz,  $\text{CDCl}_3$ , ppm)  $\delta$  8.72 (d,  $J = 8.4$  Hz, 2H), 8.25 (d,  $J = 8.4$  Hz, 2H), 7.82-7.76 (m, 4H), 7.31 (t,  $J = 7.4$  Hz, 2H);  $^{13}\text{C}$  NMR (100 MHz,  $\text{CDCl}_3$ , ppm)  $\delta$  163.3 (d,  $J = 248.4$  Hz), 156.8, 148.9 (d,  $J = 12.7$  Hz), 136.7, 129.6 (d,  $J = 9.8$  Hz), 125.5, 118.8 (d,  $J = 2.5$  Hz), 117.5 (d,  $J = 25.3$  Hz), 113.5 (d,  $J = 20.1$  Hz); HRMS (maldi, m/z): calcd. for  $\text{C}_{18}\text{H}_{10}\text{F}_2\text{N}_2\text{Na}$   $[\text{M}+\text{Na}]^+$  315.0710, found 315.0716.

### 6, 6'-difluoro-2, 2'-biquinoline (5f) <sup>[2]</sup>

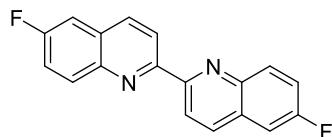

The reaction was conducted with 4-fluoroaniline (**1h**, 19.0  $\mu\text{L}$ , 0.2 mmol) and 1,4-dioxane (1.5 mL). The residue was purified by column chromatography on silica gel (petroleum ether/EtOAc = 5:1 to 2:1) afforded the product **5f** as red solid (9.9 mg, 34%)

$^1\text{H}$  NMR (400 MHz,  $\text{CDCl}_3$ , ppm)  $\delta$  8.76 (d,  $J = 8.4$  Hz, 2H), 8.20 (d,  $J = 8.8$  Hz, 2H), 8.15 (dd,  $J = 9.2, 5.2$  Hz, 2H), 7.49-7.42 (m, 4H);  $^{13}\text{C}$  NMR (100 MHz,  $\text{CDCl}_3$ , ppm)  $\delta$  160.8 (d,  $J = 247.5$  Hz), 155.4, 145.0, 136.1 (d,  $J = 5.3$  Hz), 132.4 (d,  $J = 9.2$  Hz), 129.1 (d,  $J = 10.1$  Hz), 120.0,

119.7, 110.7 (d,  $J = 21.6$  Hz); HRMS (maldi,  $m/z$ ): calcd. for  $C_{18}H_{11}F_2N_2$   $[M+H]^+$  293.0890, found 293.0884.

### 6, 6', 8, 8'-tetramethyl-2, 2'-biquinoline (5g)

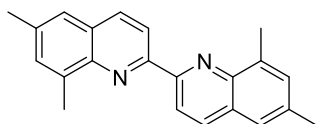

The reaction was conducted with 2,4-dimethylaniline (**1e**, 24.7  $\mu$ L, 0.2 mmol) and 1,4-dioxane (1.5 mL). The residue was purified by column chromatography on silica gel (petroleum ether/EtOAc = 5:1 to 2:1) afforded the product **5g** as yellow solid (20.3 mg, 65%), mp 233.1-236.2  $^{\circ}$ C

$^1$ H NMR (400 MHz,  $CDCl_3$ , ppm)  $\delta$  8.87 (d,  $J = 8.8$  Hz, 2H), 8.17 (d,  $J = 8.8$  Hz, 2H), 7.47 (s, 2H), 7.44 (s, 2H), 2.92 (s, 6H), 2.52 (s, 6H);  $^{13}C$  NMR (100 MHz,  $CDCl_3$ , ppm)  $\delta$  154.5, 145.4, 137.3, 136.3, 136.0, 131.8, 128.4, 124.5, 118.9, 21.7, 17.8; HRMS (maldi,  $m/z$ ): calcd. for  $C_{22}H_{21}N_2$   $[M+H]^+$  313.1705, found 313.1706.

### Diphenylamine (Y) <sup>[1]</sup>

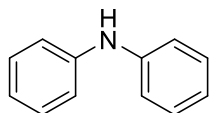

The reaction was conducted with nitrobenzene (**W**, 0.2 mmol) and cyclohexanone (**X**, 0.4 mmol). The residue was purified by column chromatography on silica gel (petroleum ether/EtOAc = 98:2) afforded the product **Y** as white solid (23.7 mg, 70%, **4w** as ligand), mp 52.7-54.0  $^{\circ}$ C.

$^1$ H NMR (400 MHz,  $CDCl_3$ , ppm)  $\delta$  7.28-7.24 (m, 4H), 7.07 (d,  $J = 8.4$  Hz, 4H), 6.92 (td,  $J = 7.2$  Hz, 0.8 Hz, 4H), 5.68 (s, 1H);  $^{13}C$  NMR (100 MHz,  $CDCl_3$ , ppm)  $\delta$  143.1, 129.3, 120.9, 117.7; HRMS (maldi,  $m/z$ ): calcd. for  $C_{12}H_{12}N$   $[M+H]^+$  170.0964, found 170.0972. The experimental data of **Y** matched with those reported in the literature.<sup>1</sup>

## 7. References

[1] Y. Xie, S. Liu, Y. Liu, Y. Wen, and G.-J. Deng, *Org. Lett.*, 2012, **14**, 1692-1695.

[2] W. Ma, J. Zhang, C. Xu, F. Chen, Y.-M. He, Q.-H. Fan, *Angew. Chem.* 2016, **128**, 20 / 55

13083-13086,4; *Angew. Chem. Int. Ed.* **2016**, 55, 12891-12894.

[3] W.-W. Xie, Y. Liu, R. Yuan, D. Zhao, T.-Z. Yu, J. Zhang, and C.-S. Da, *Adv. Synth. Catal.* 2016, **358**, 994-1002.

## 8. Copies of $^1\text{H}$ and $^{13}\text{C}$ NMR spectra of all products

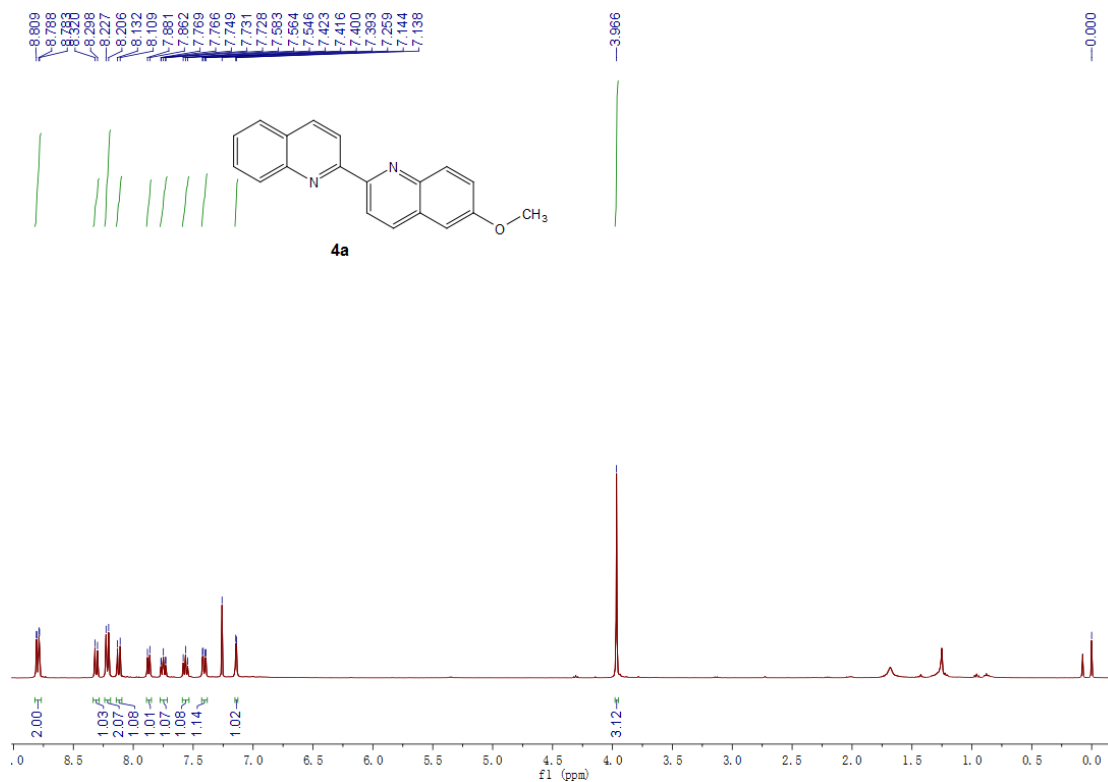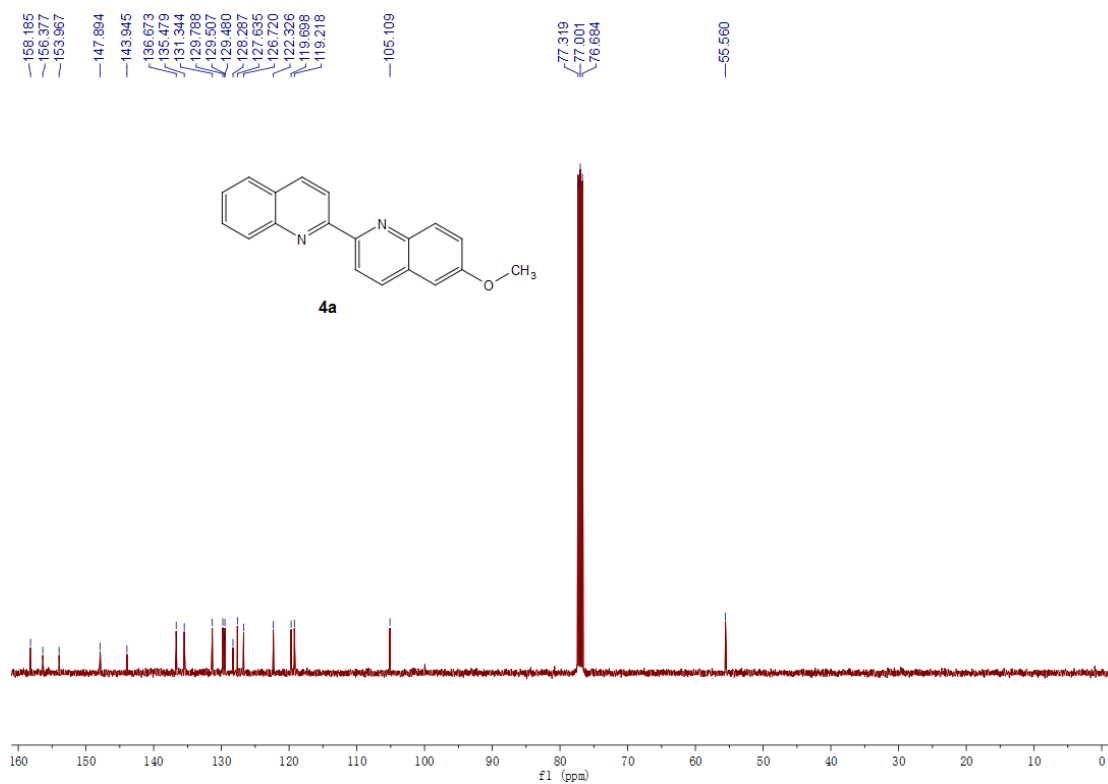

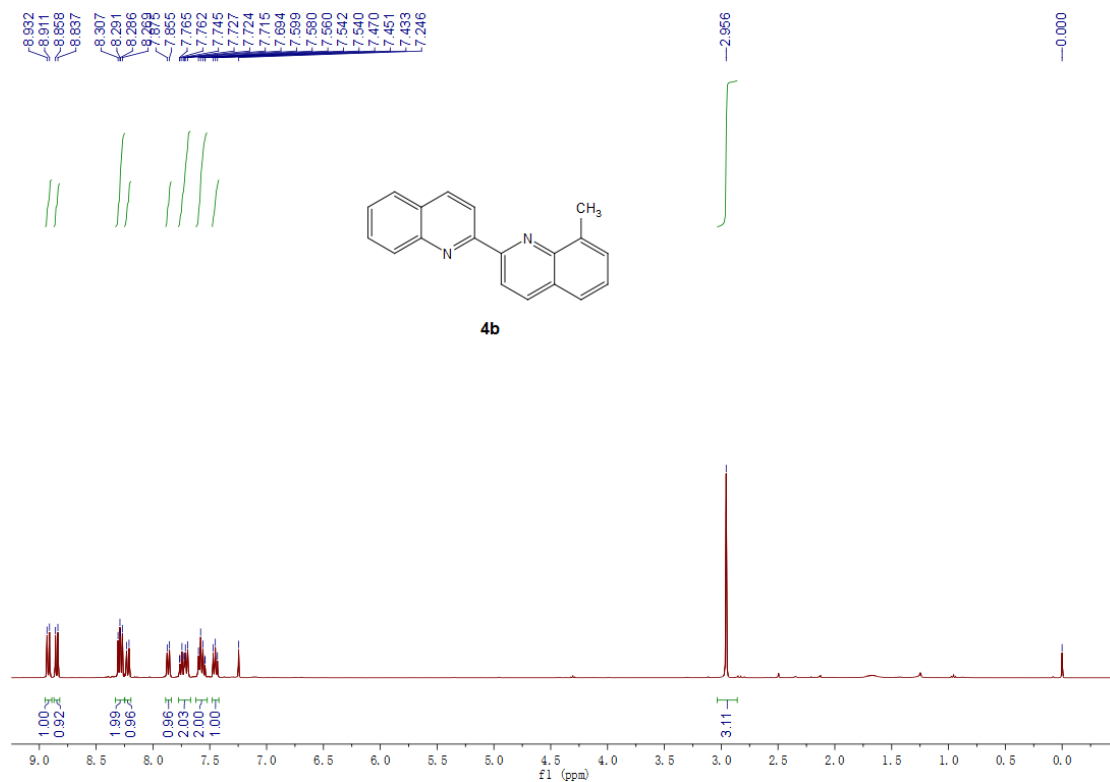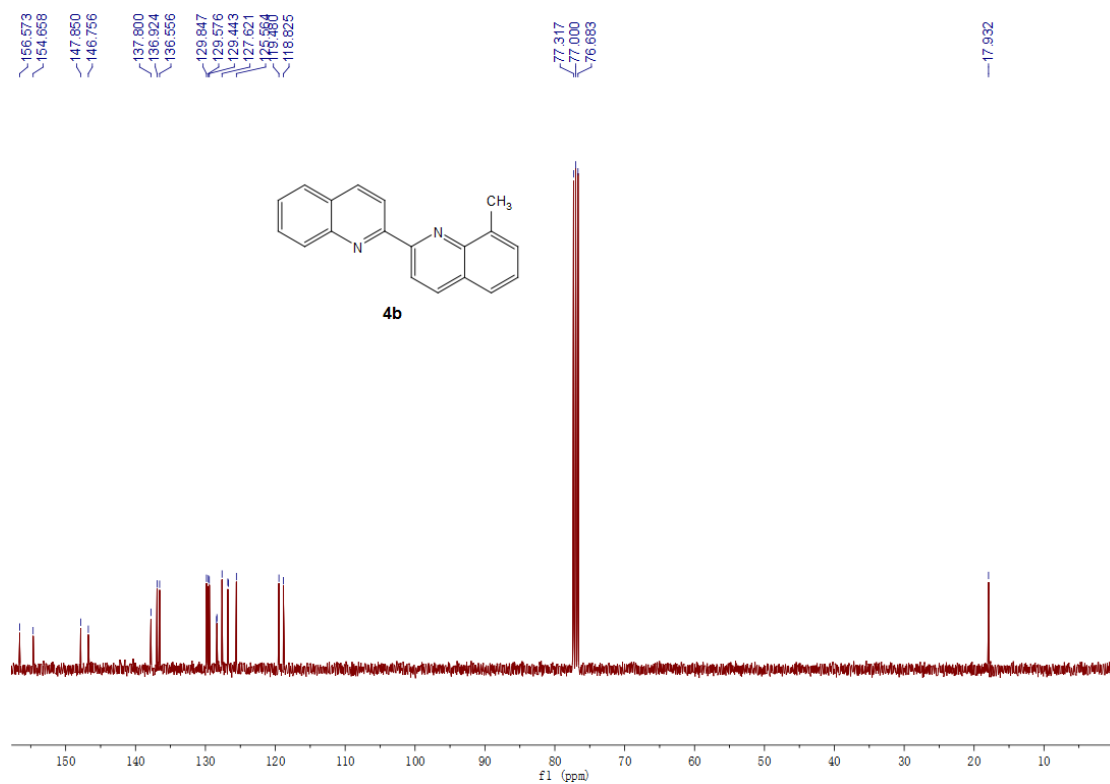

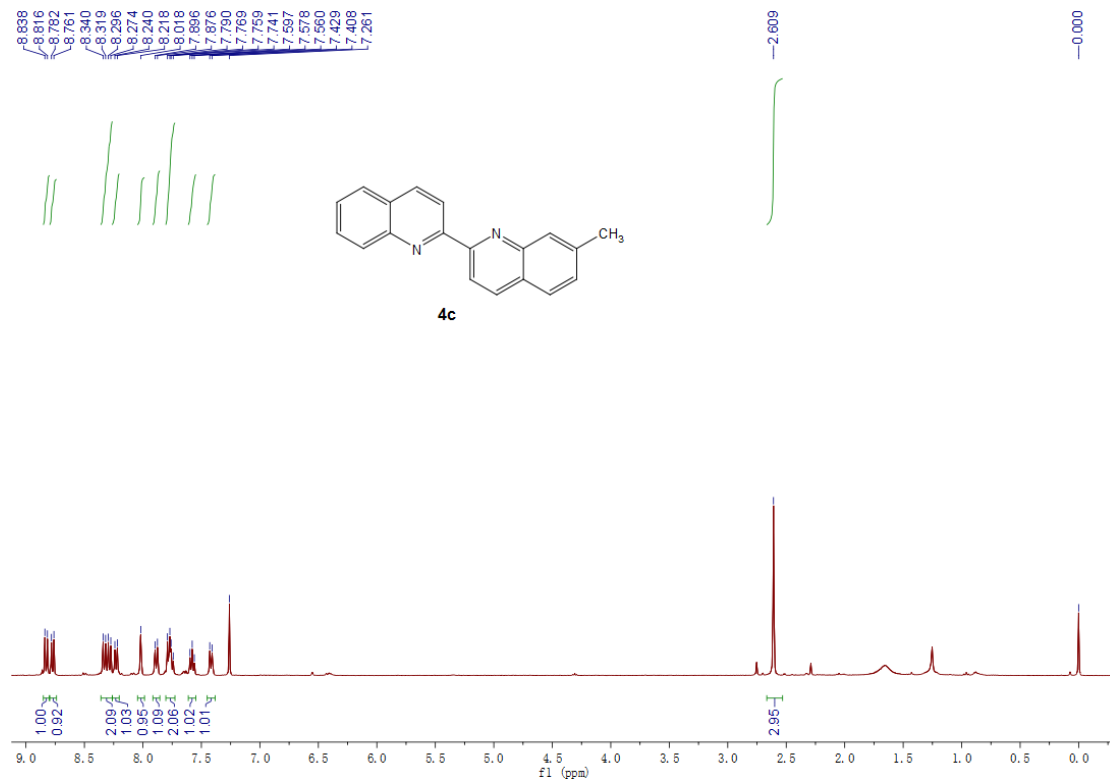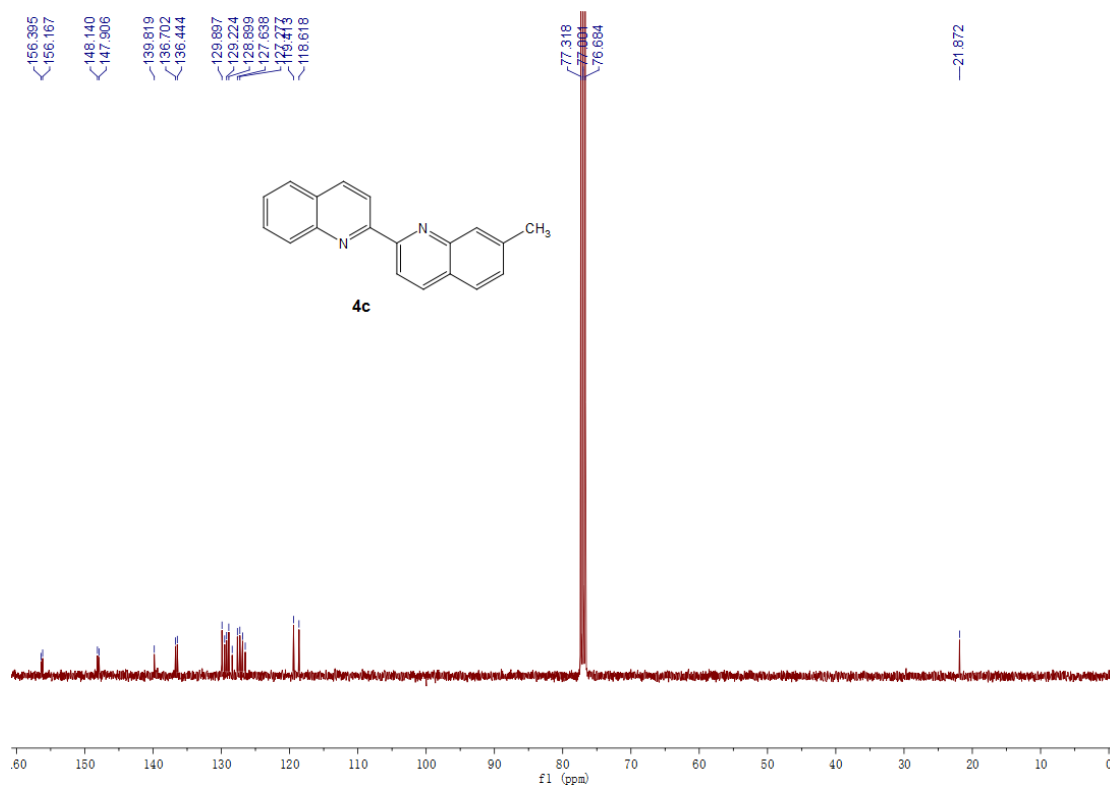



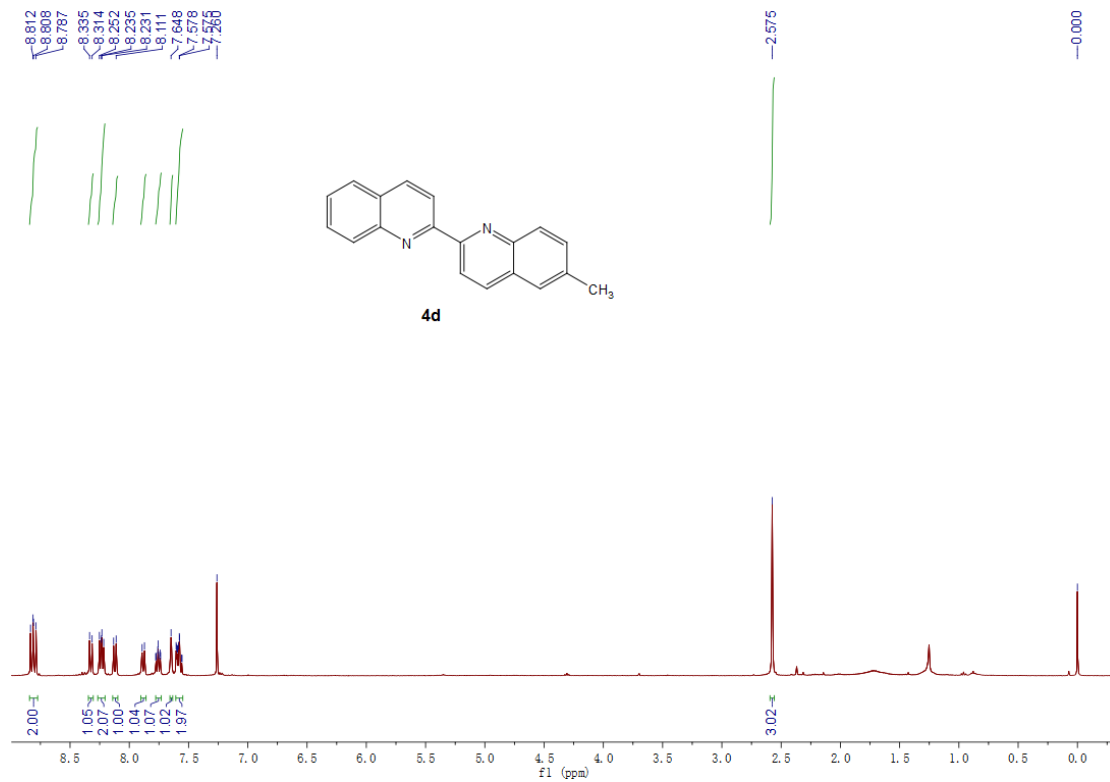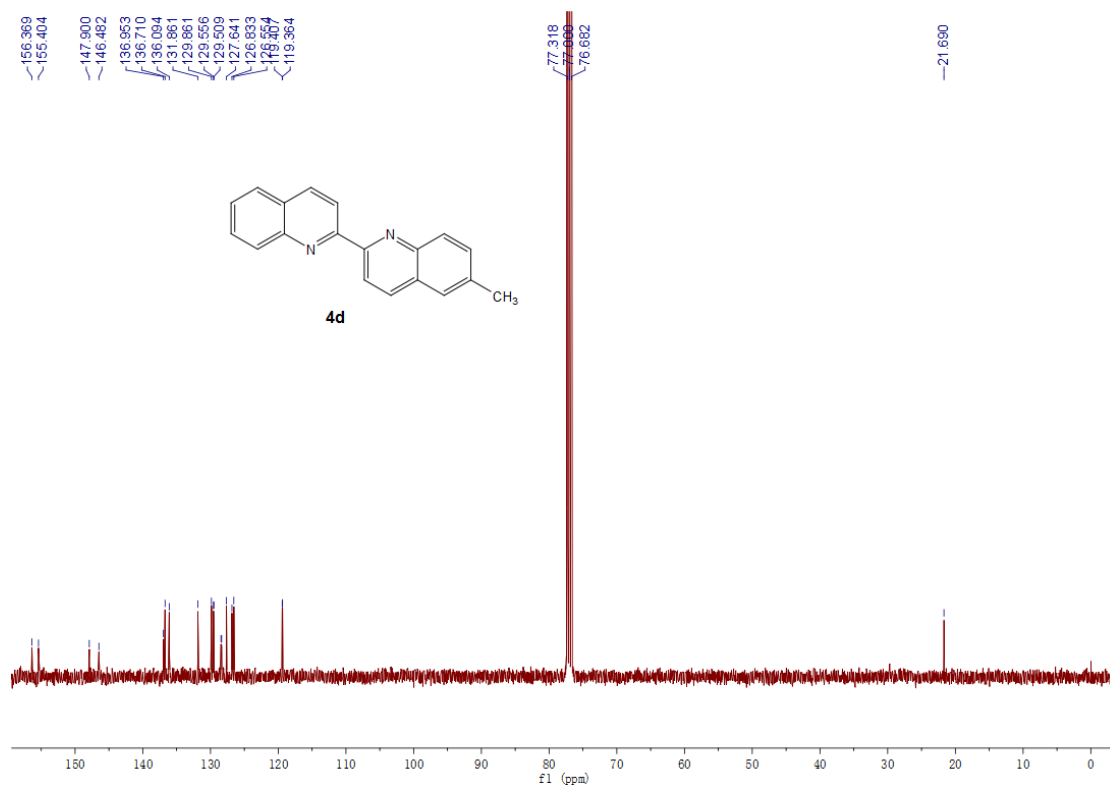

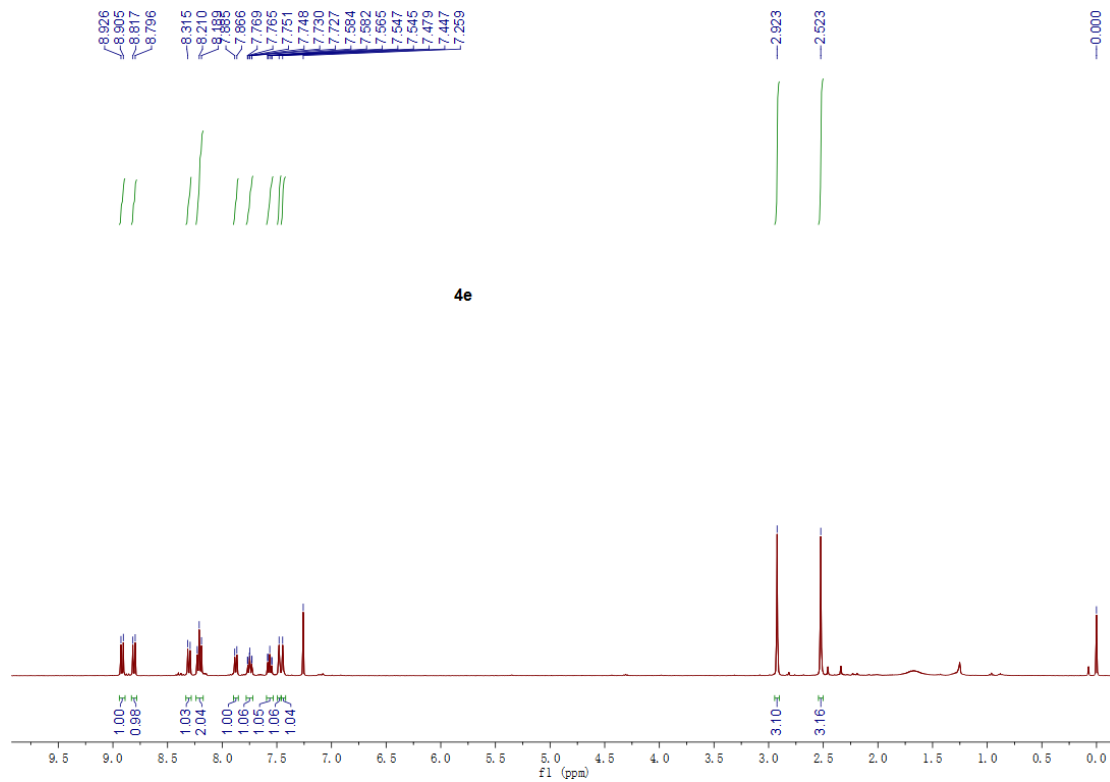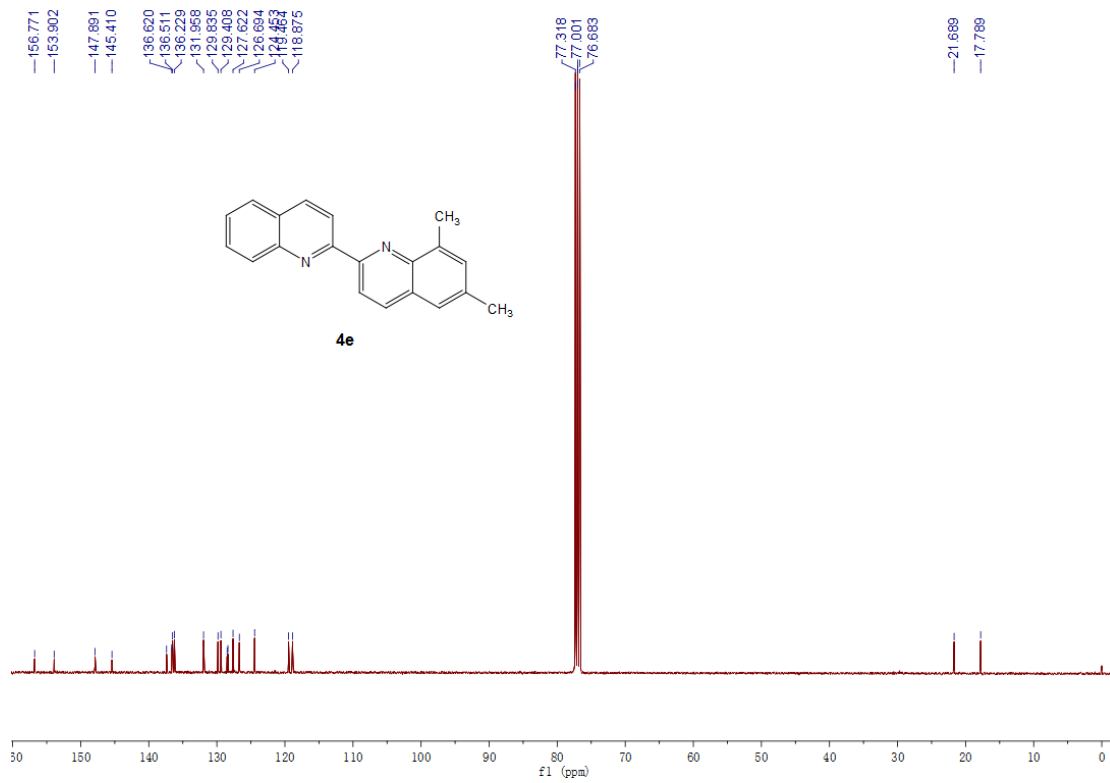

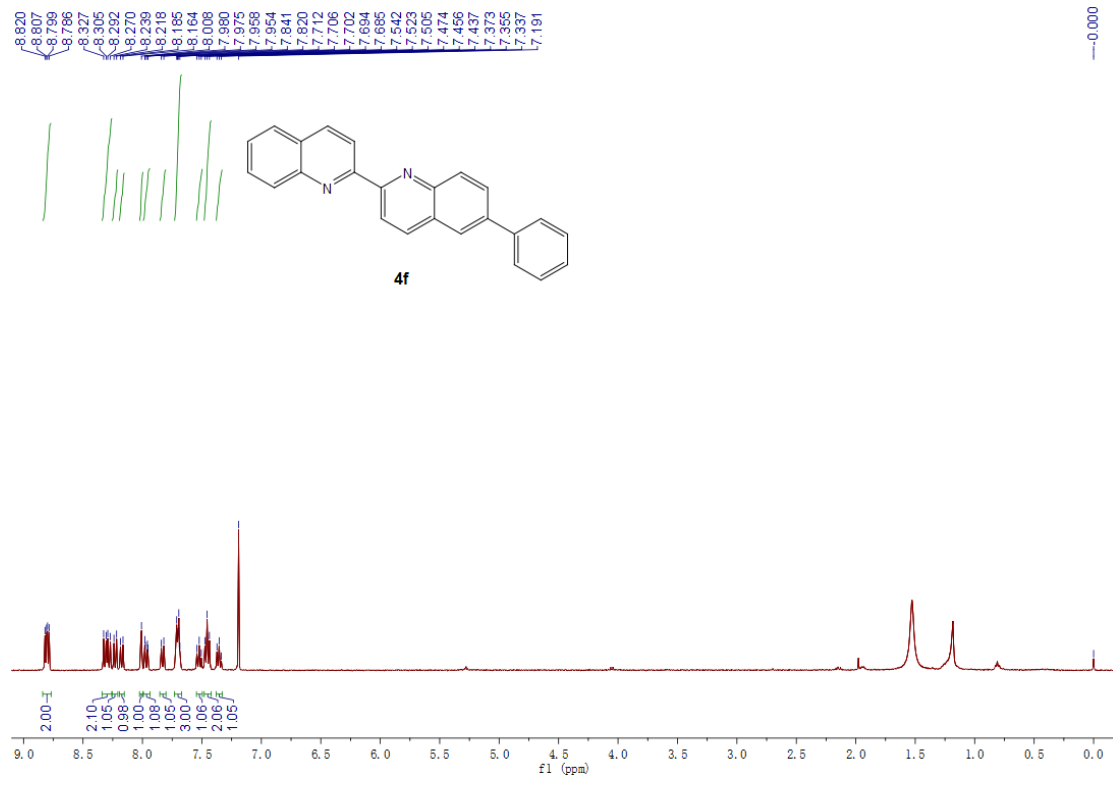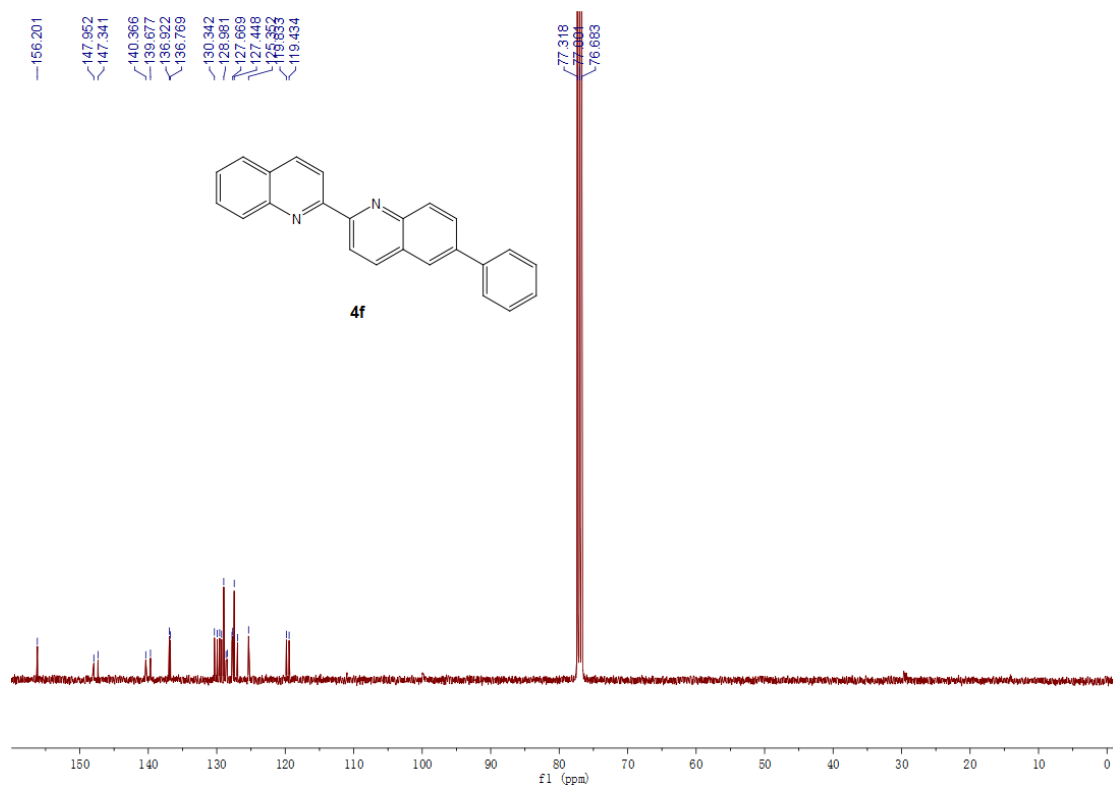

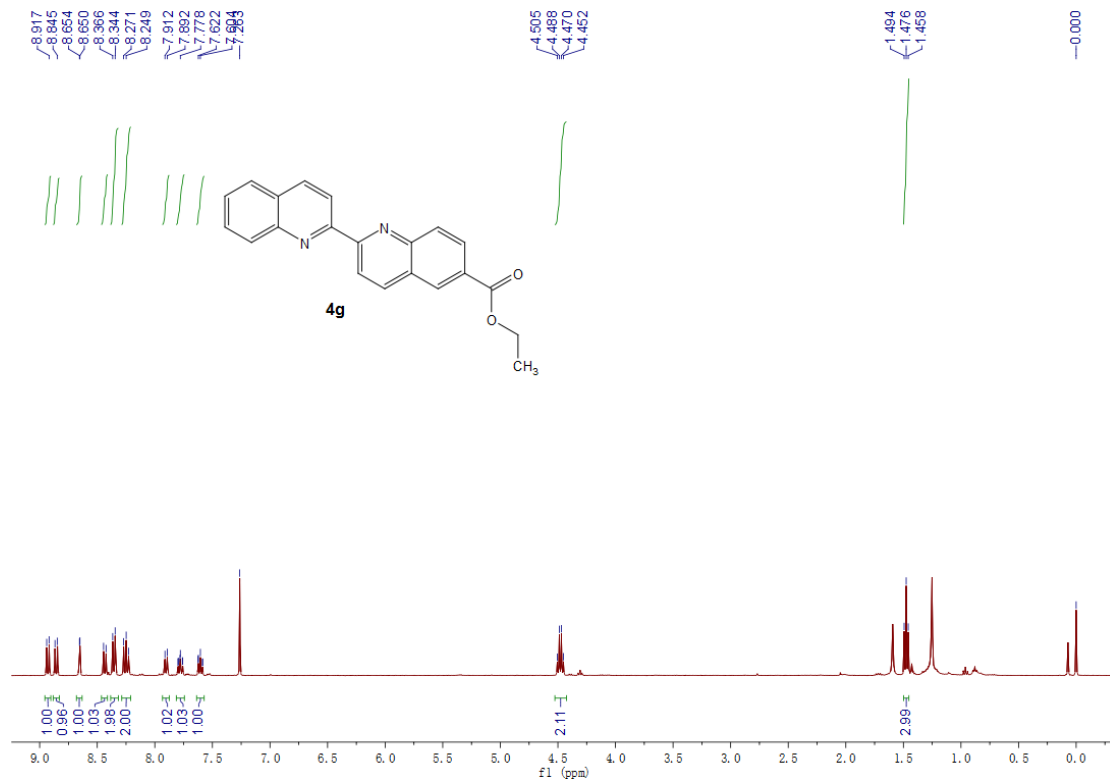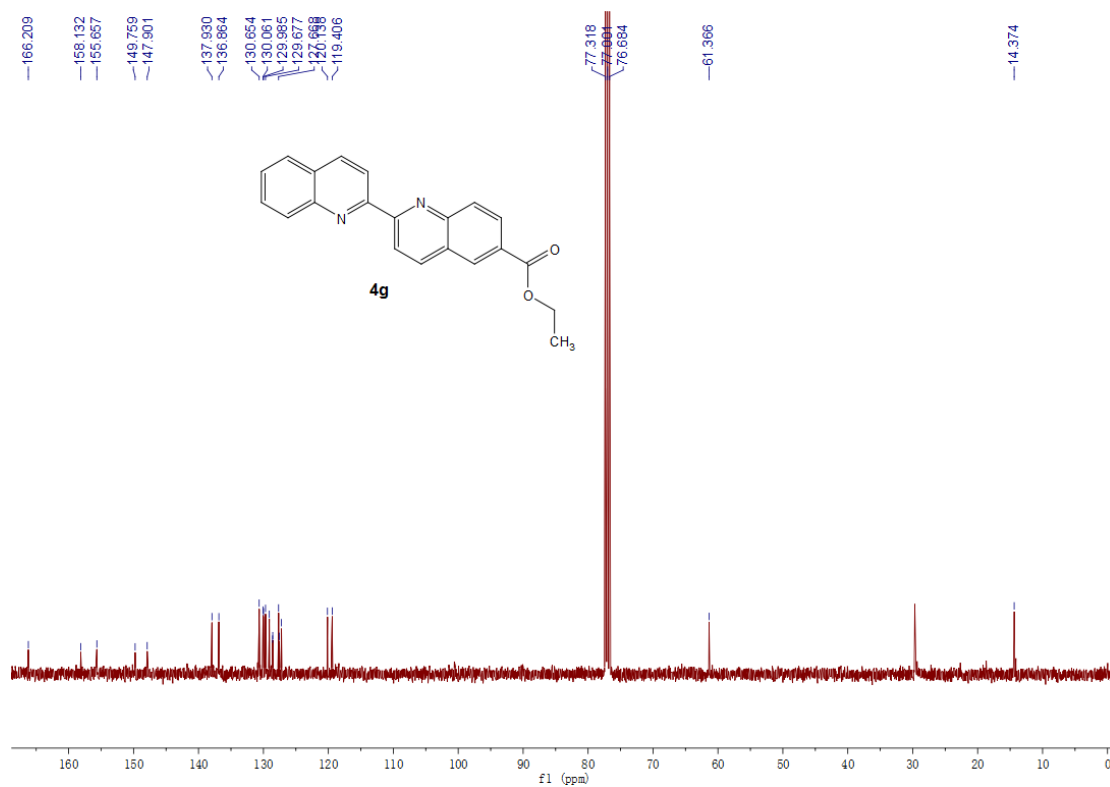

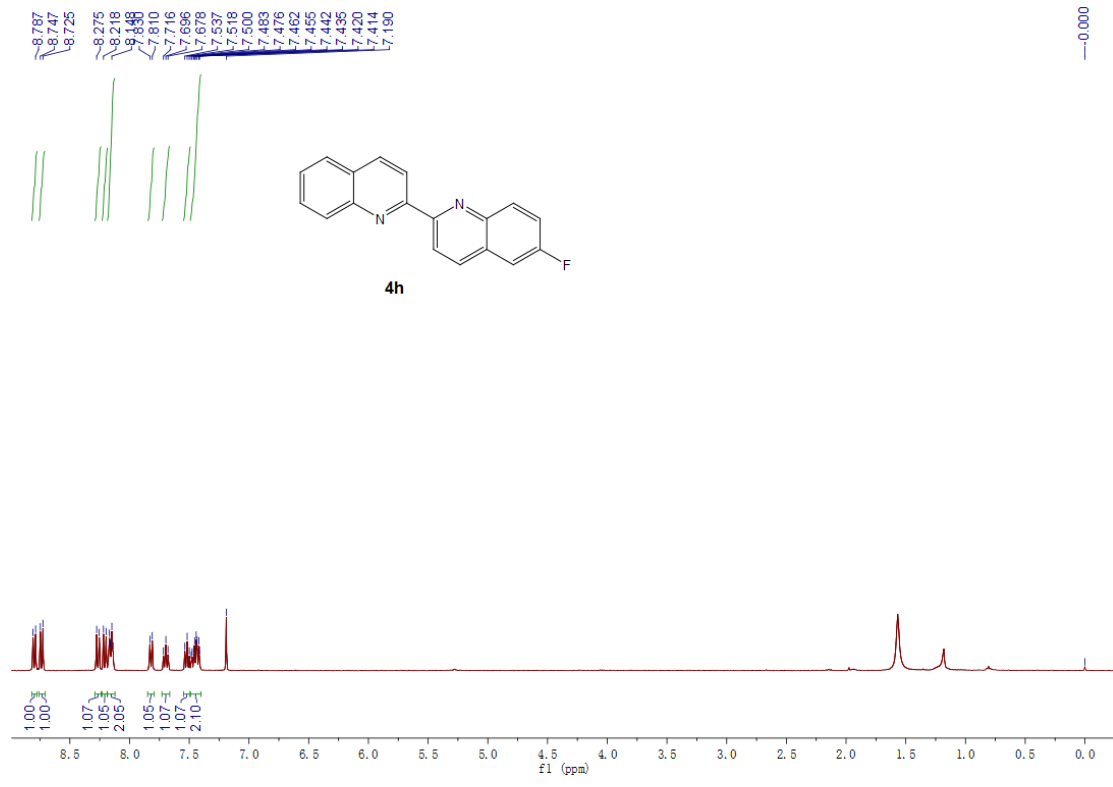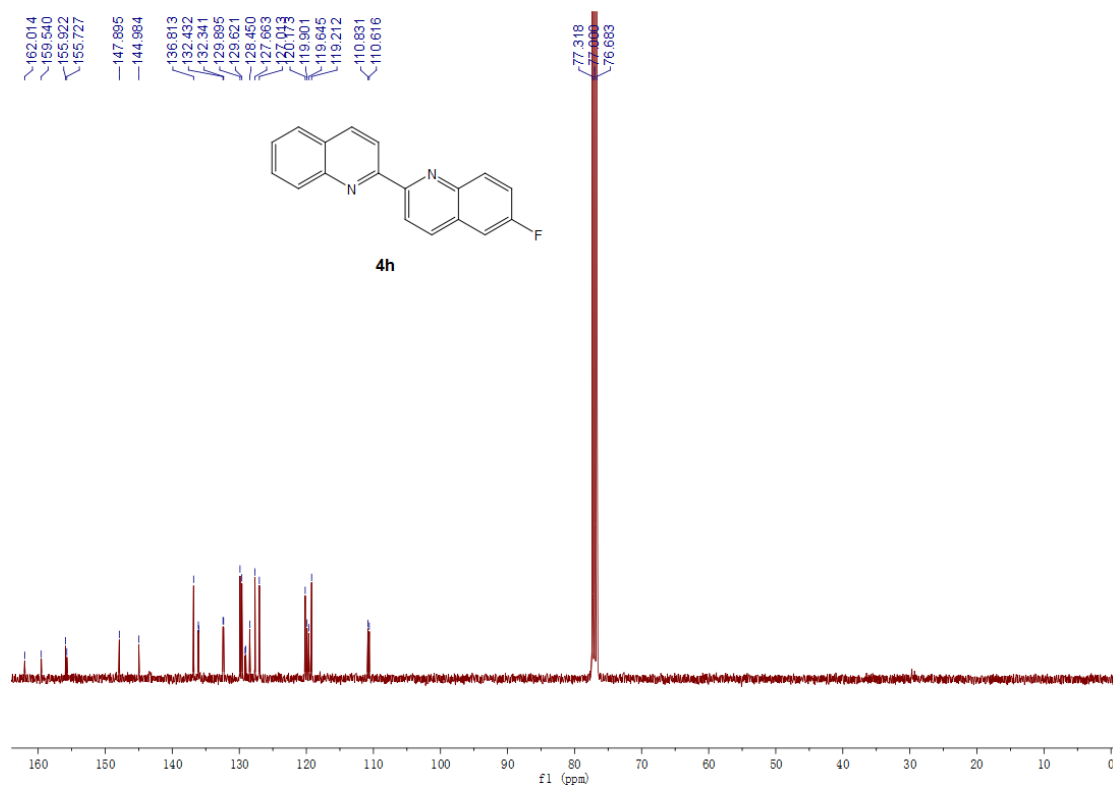

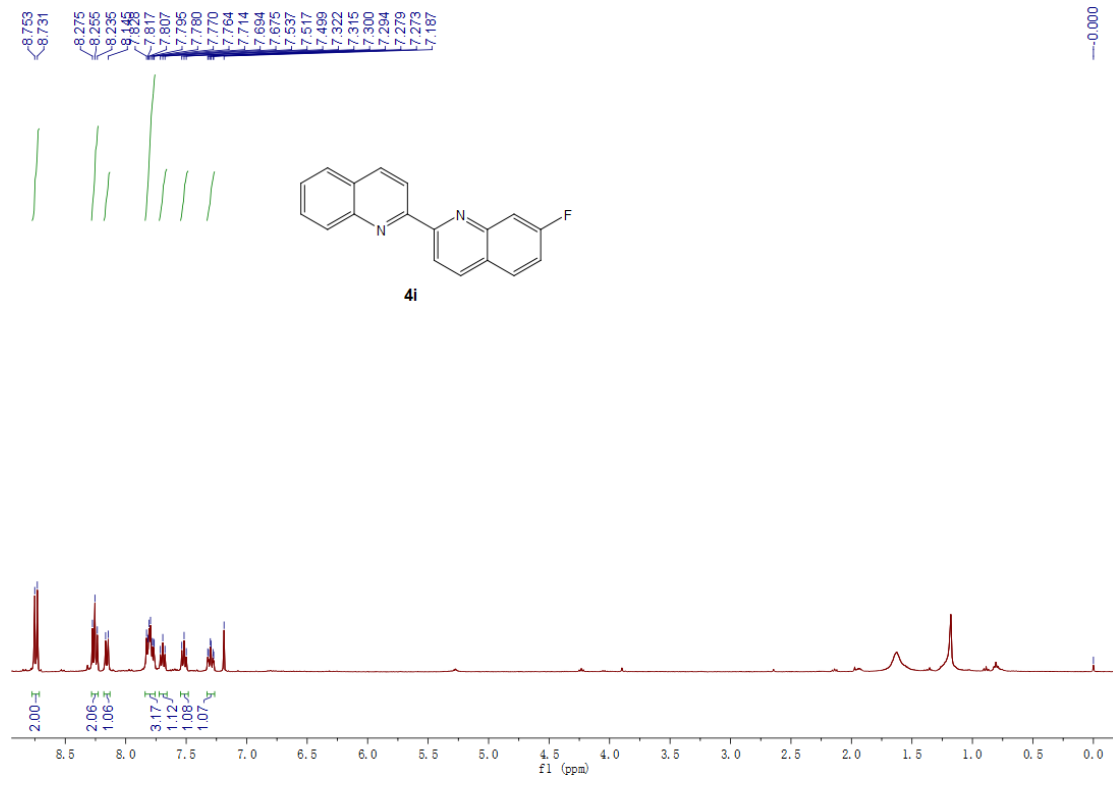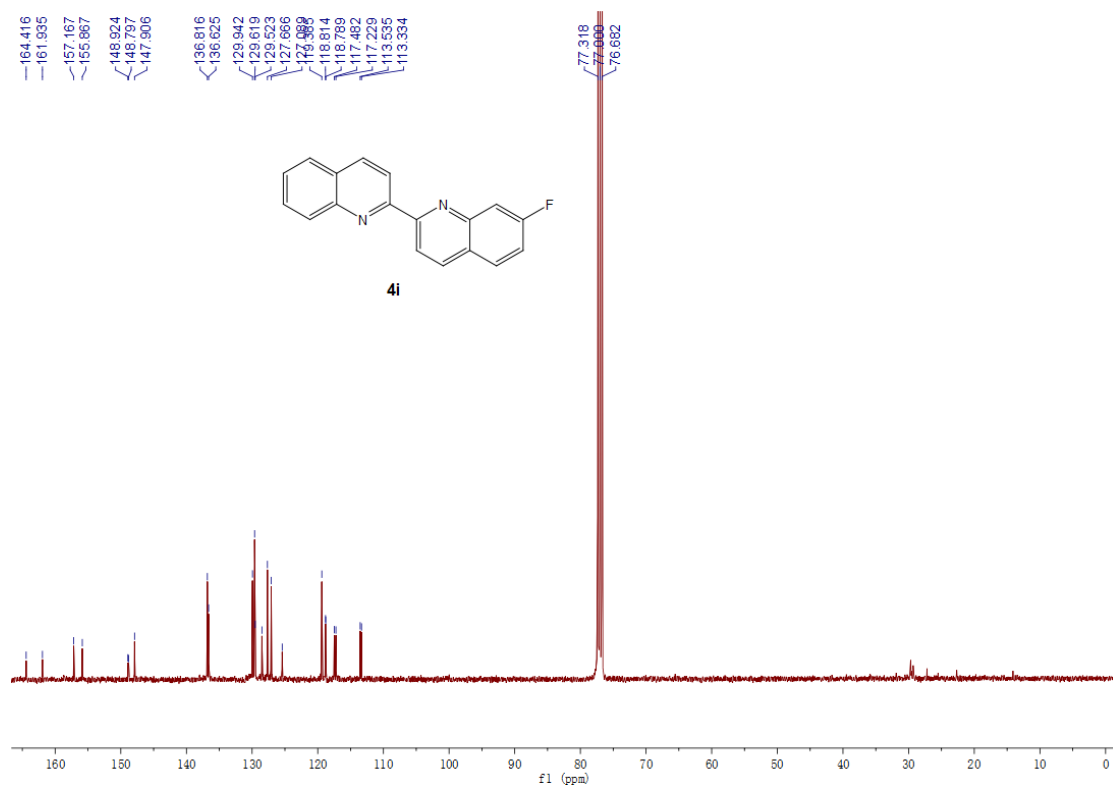

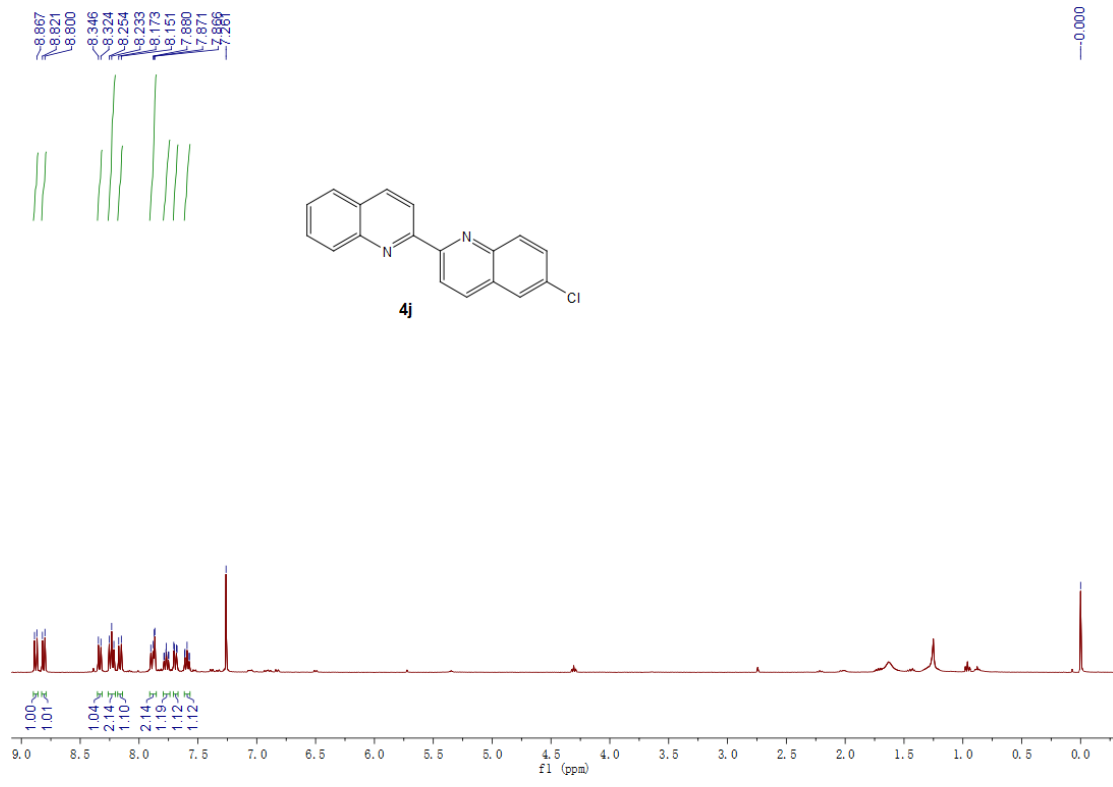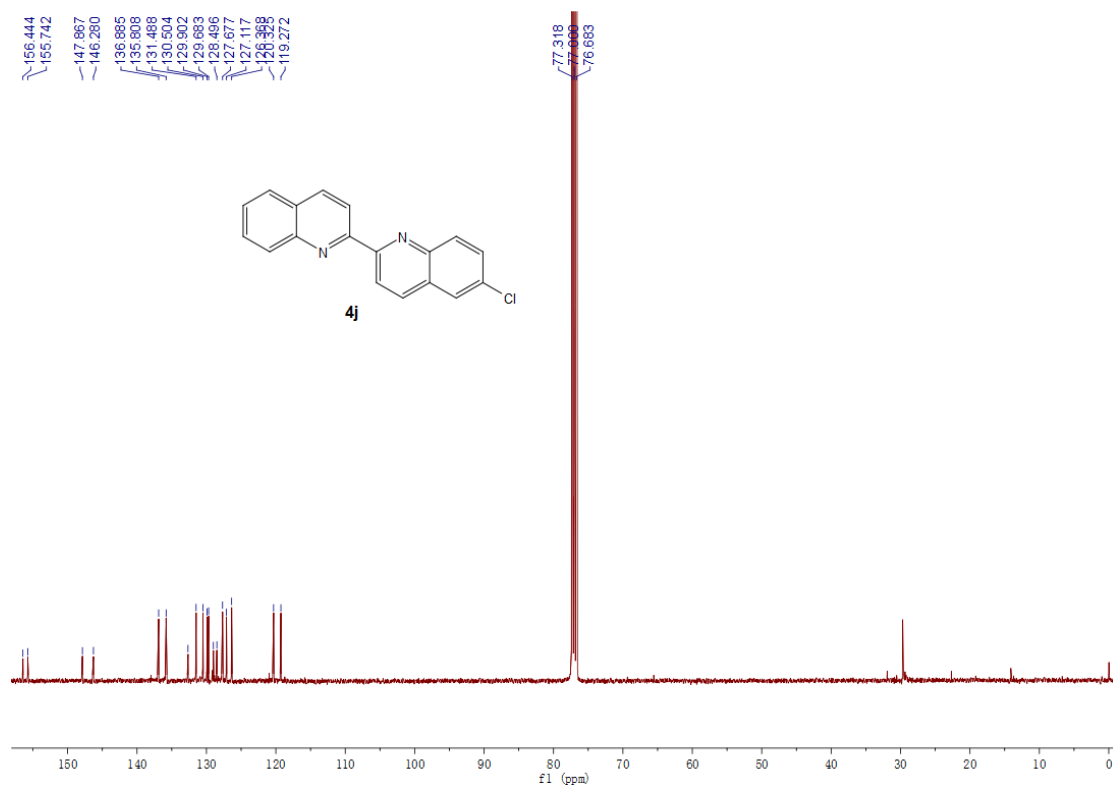

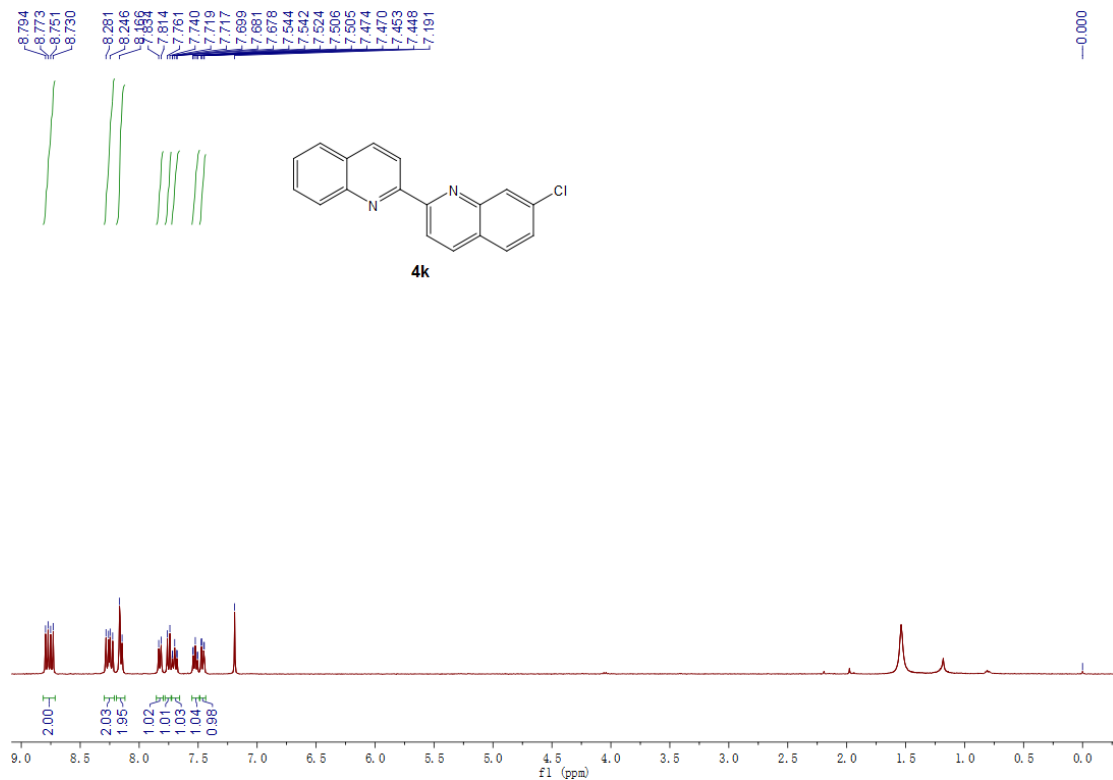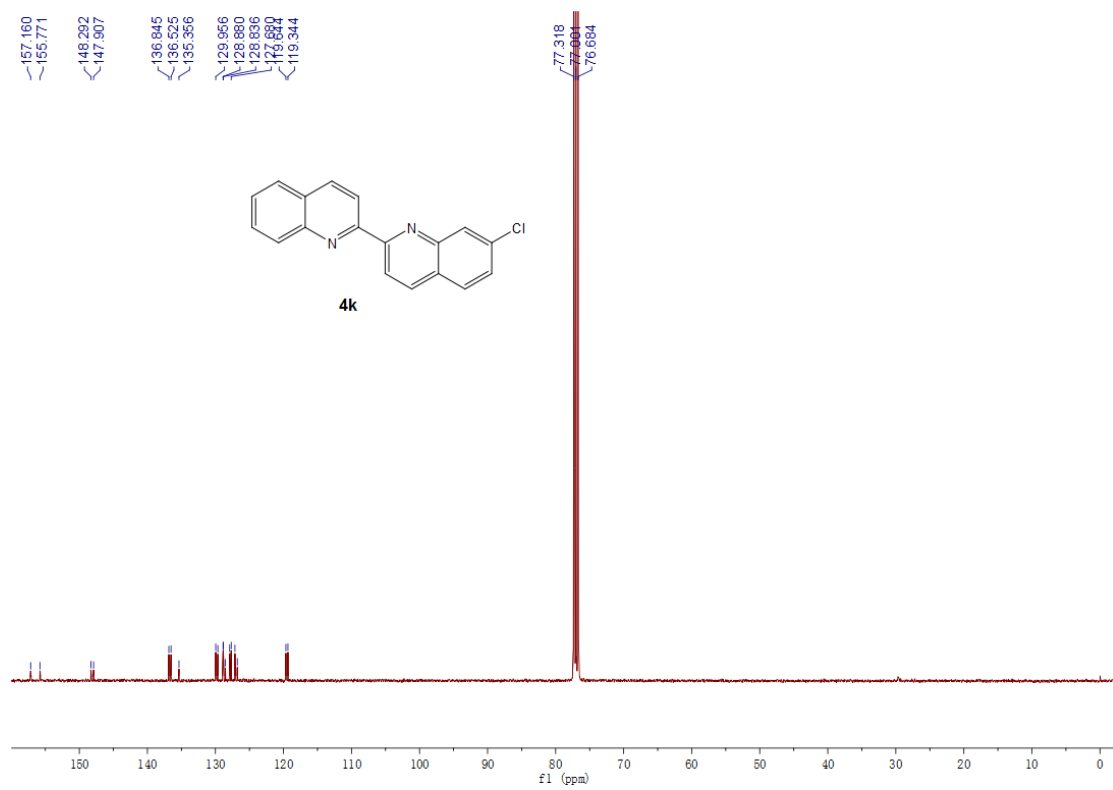



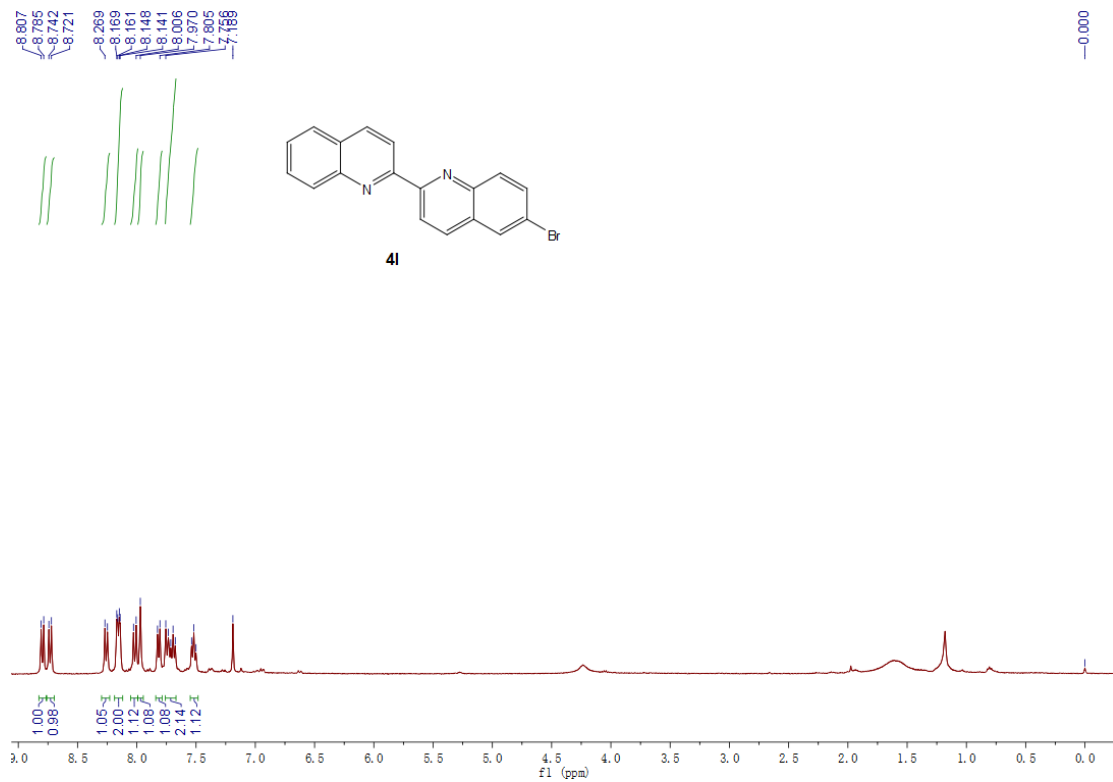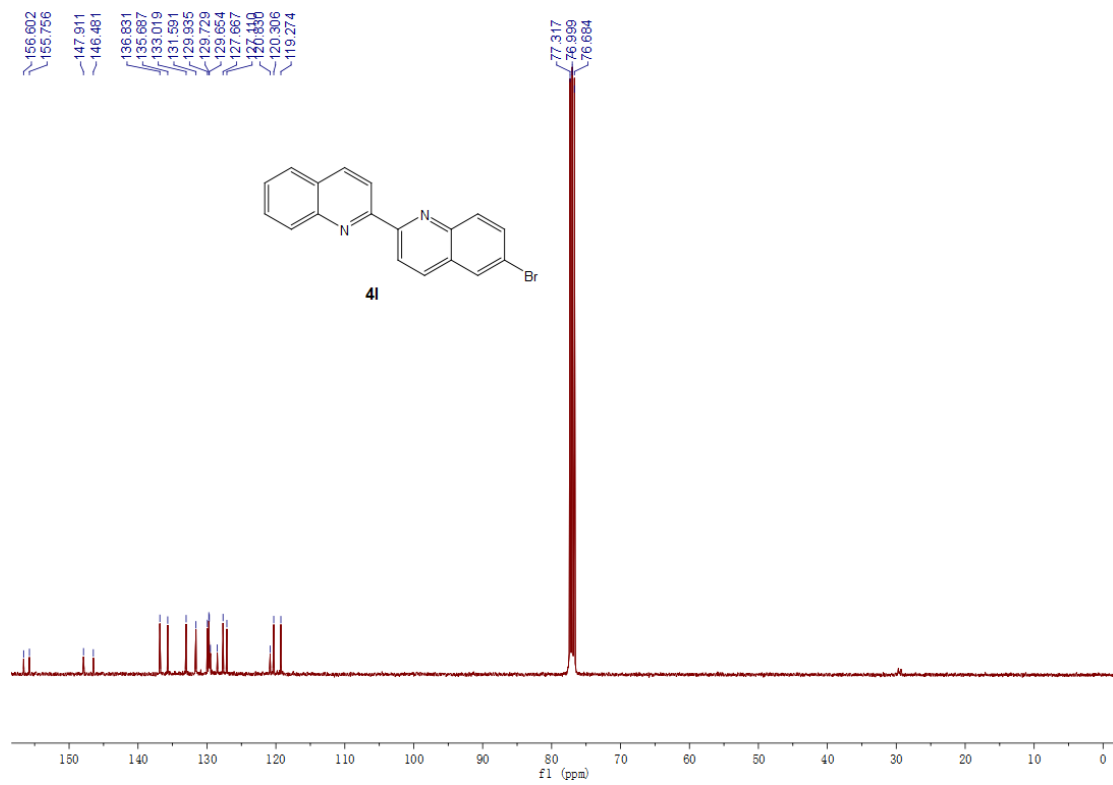

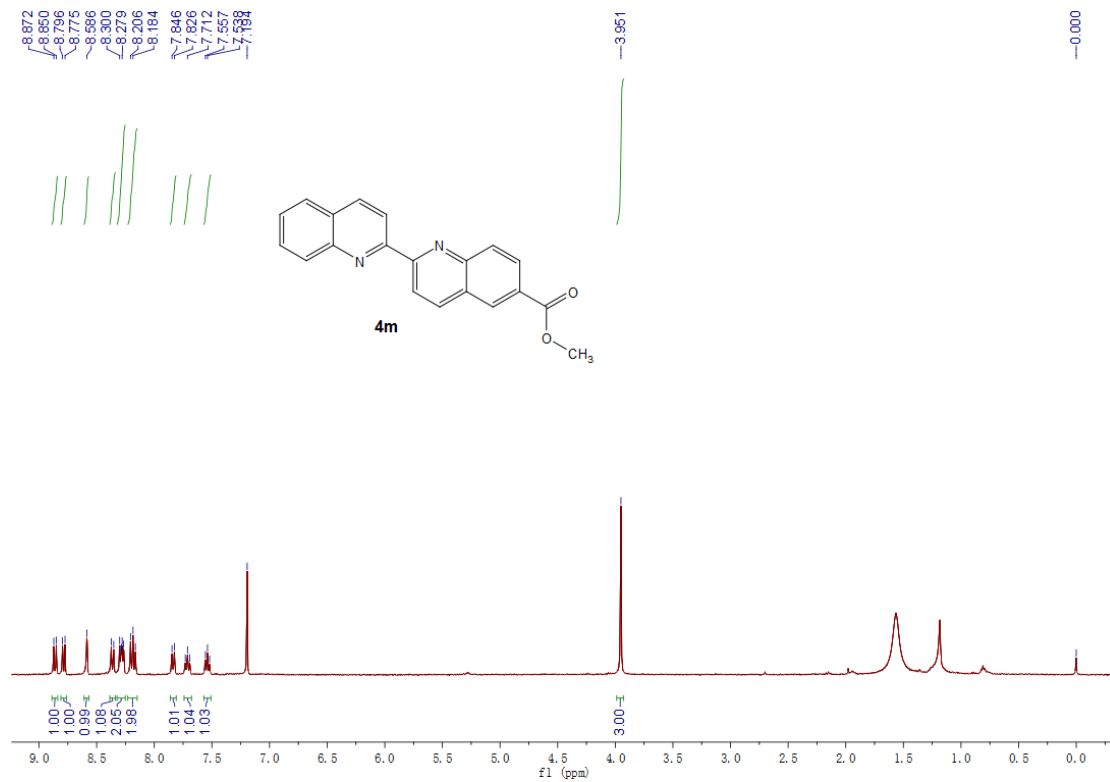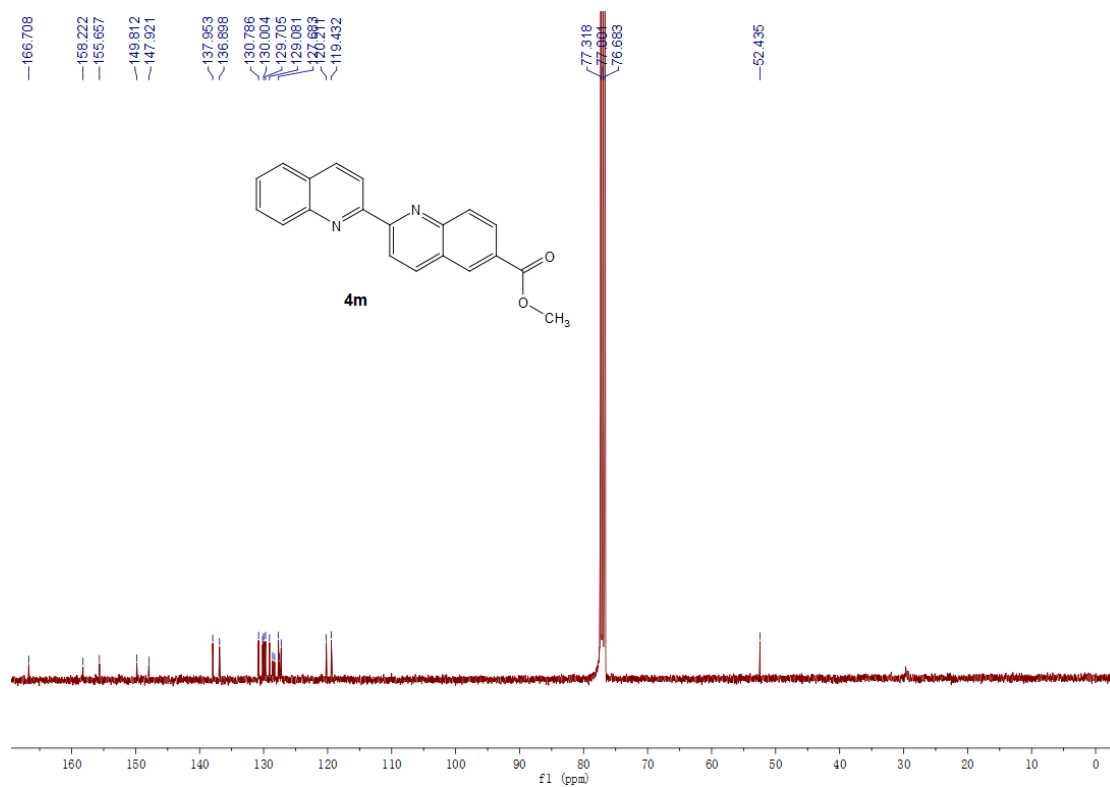

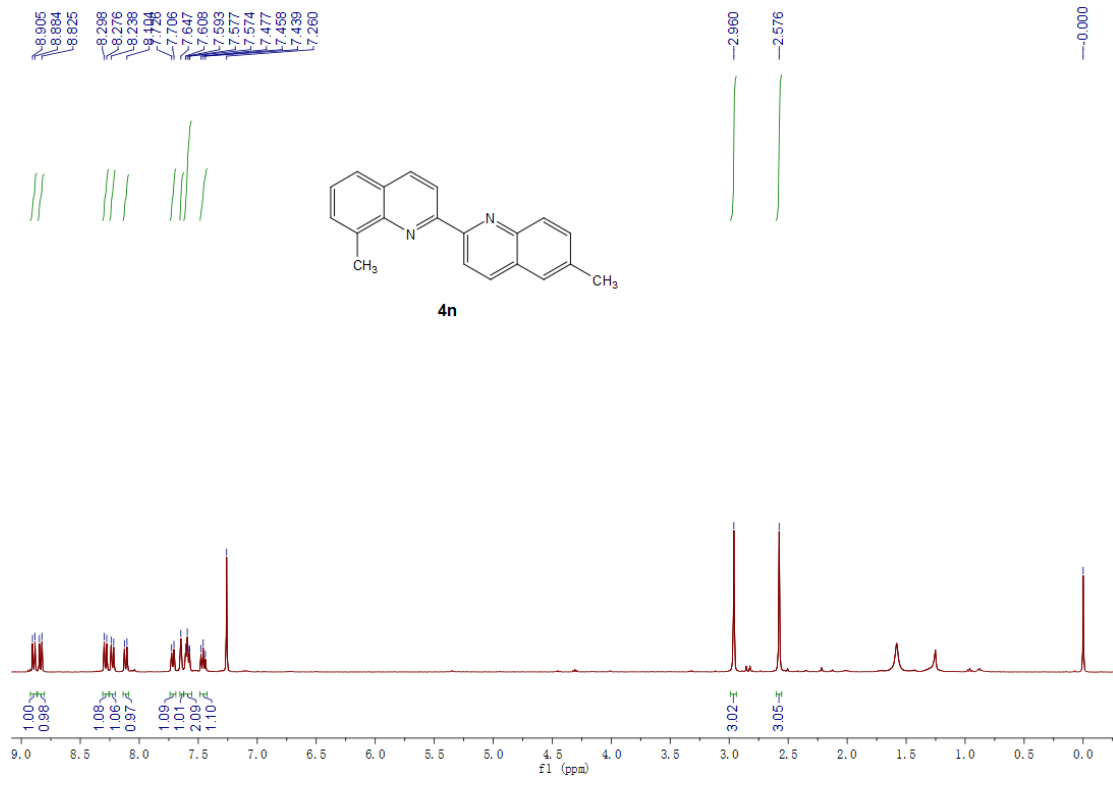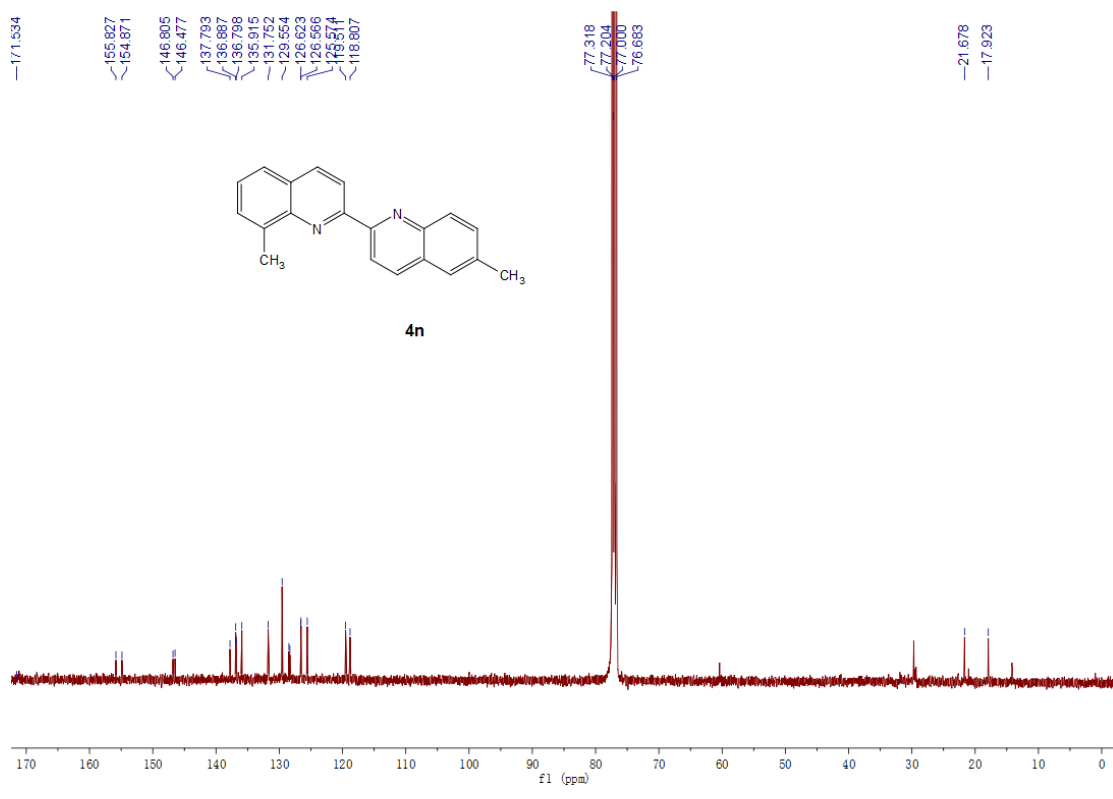

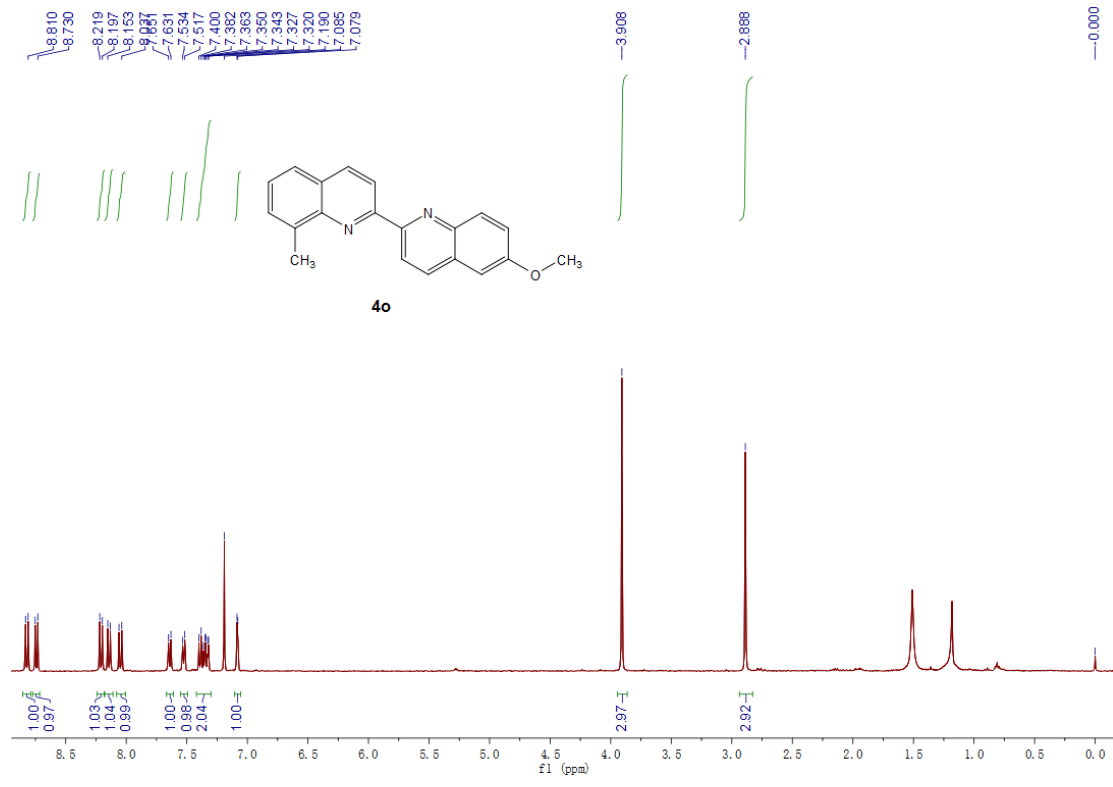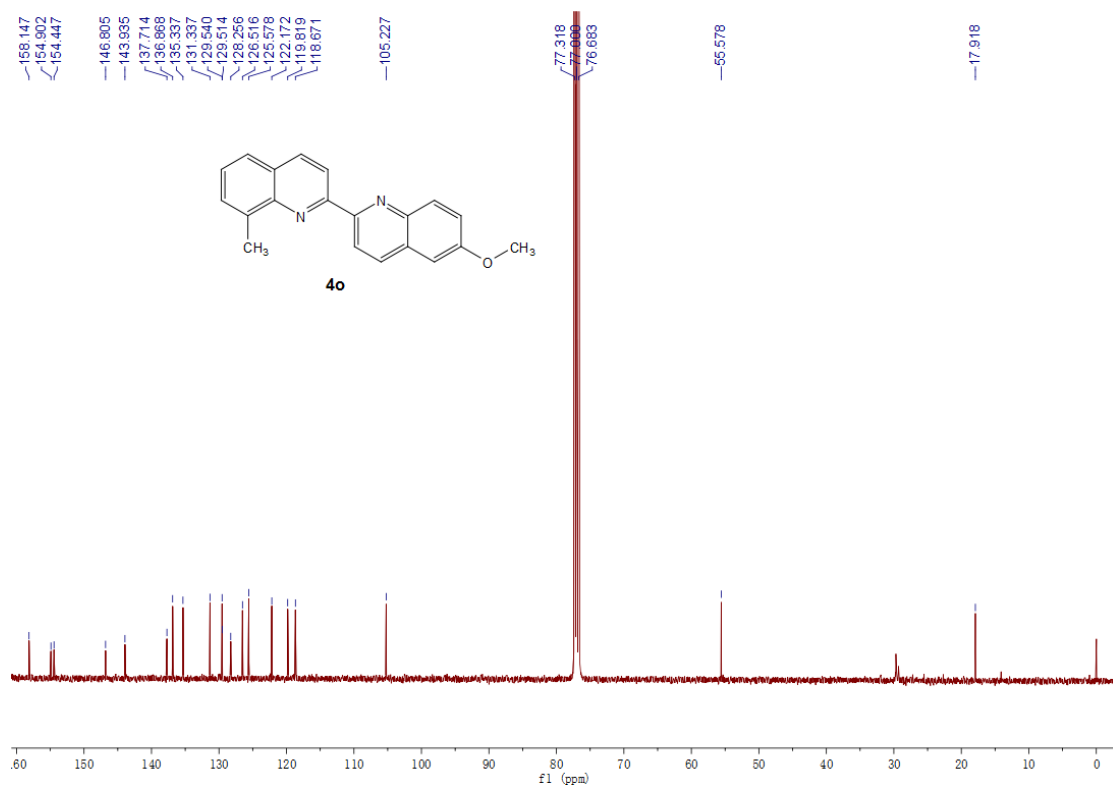

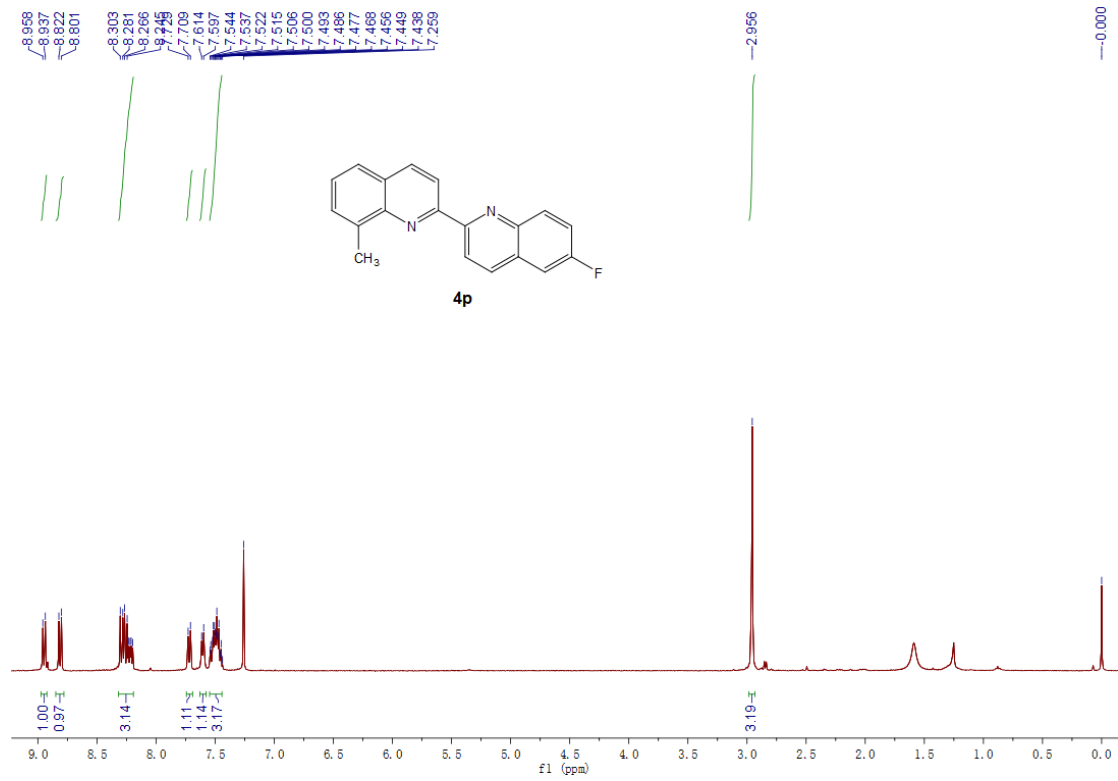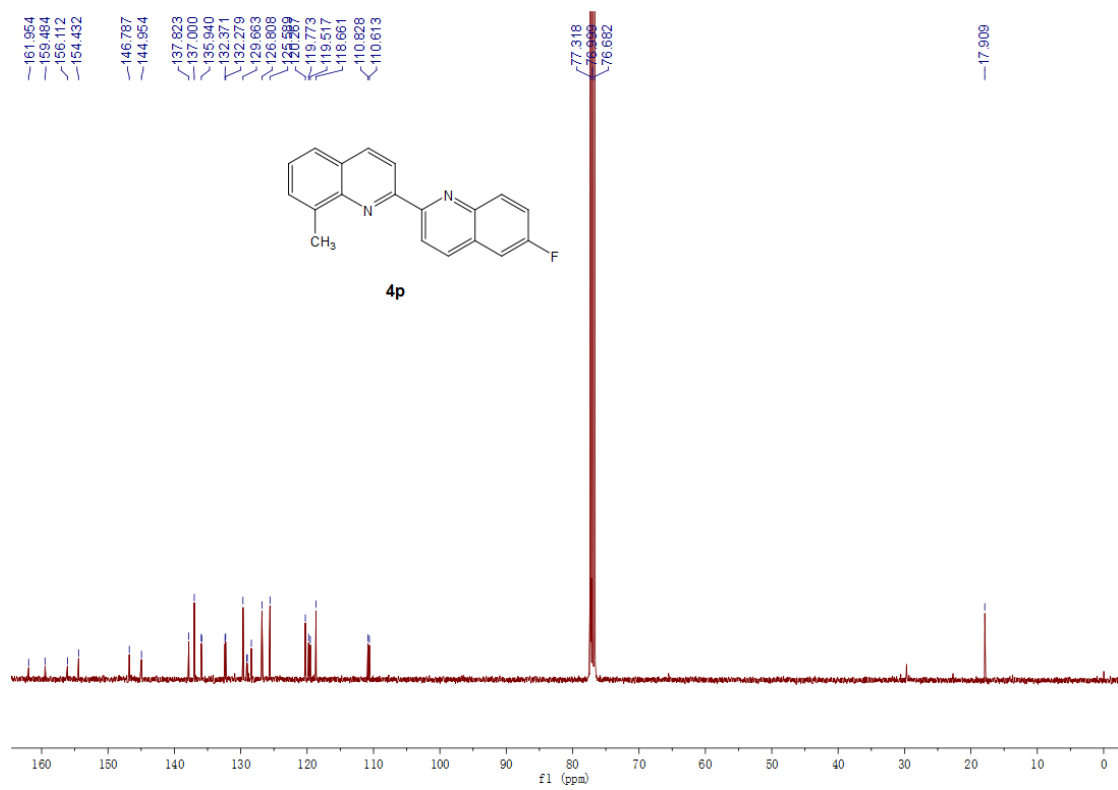

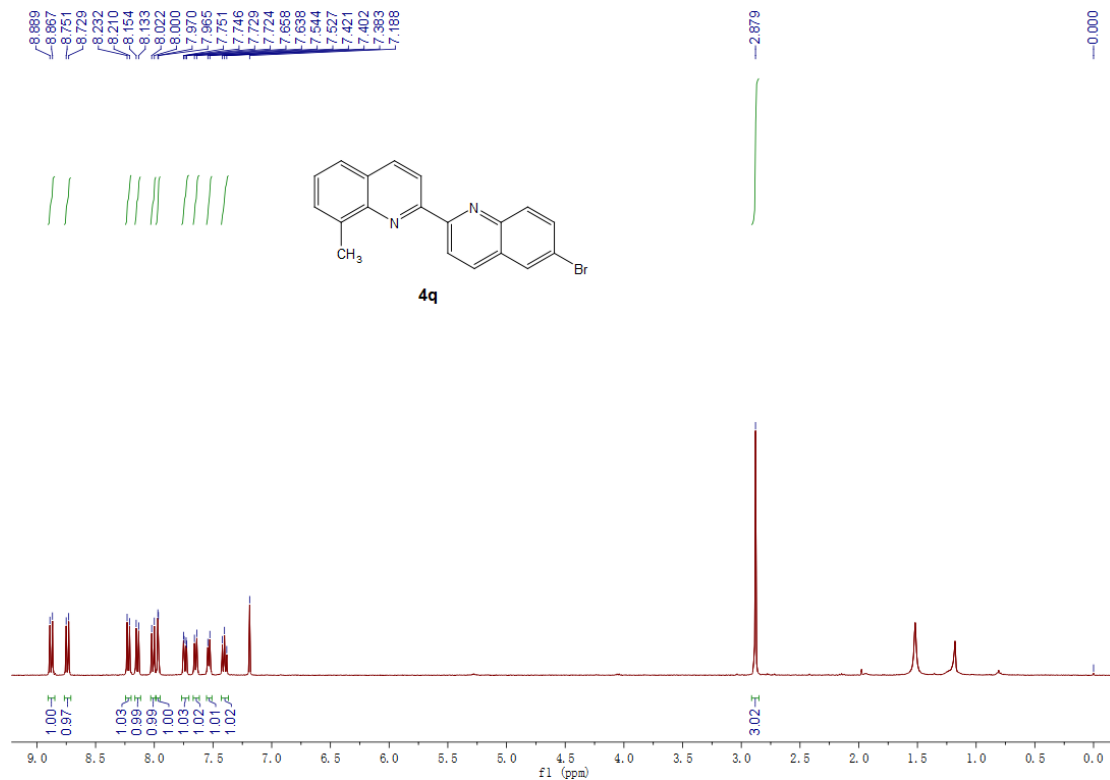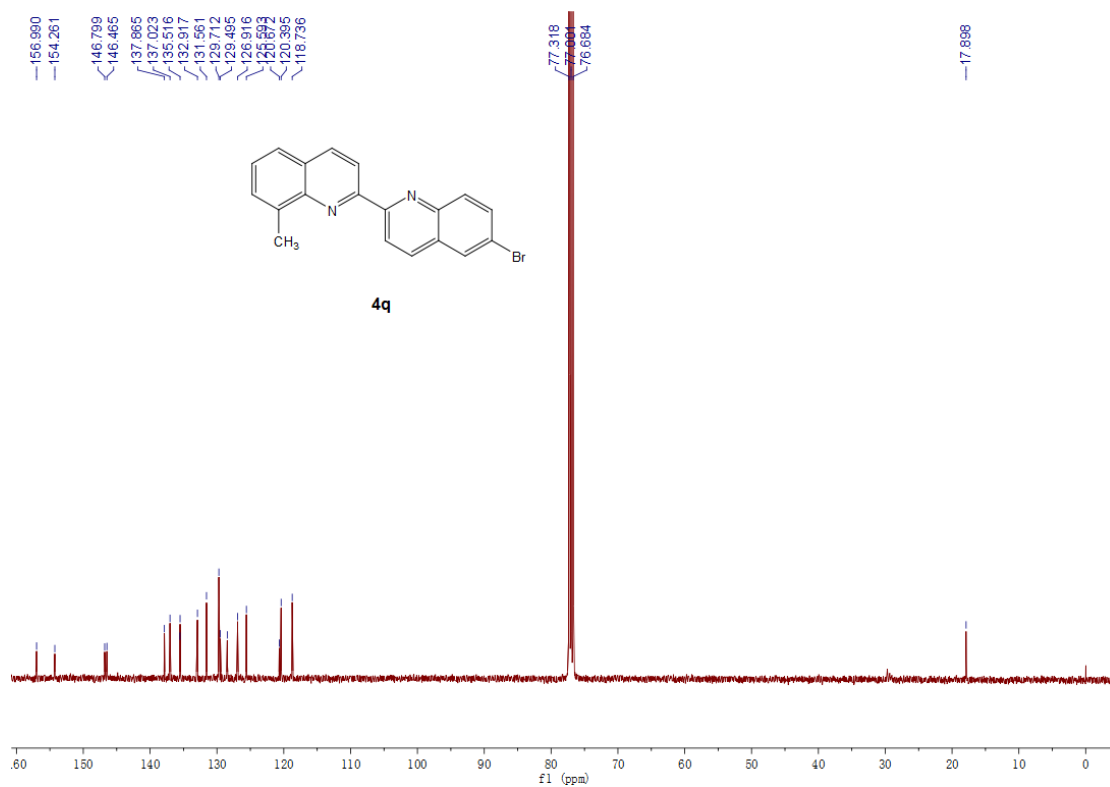

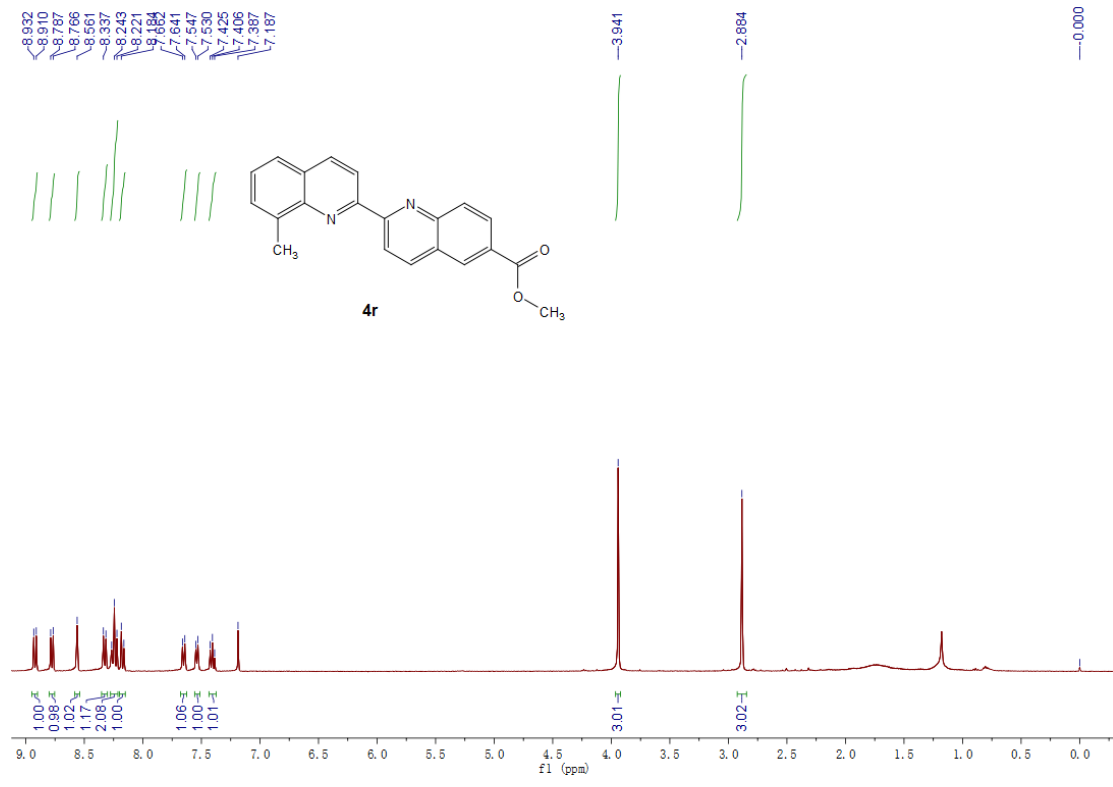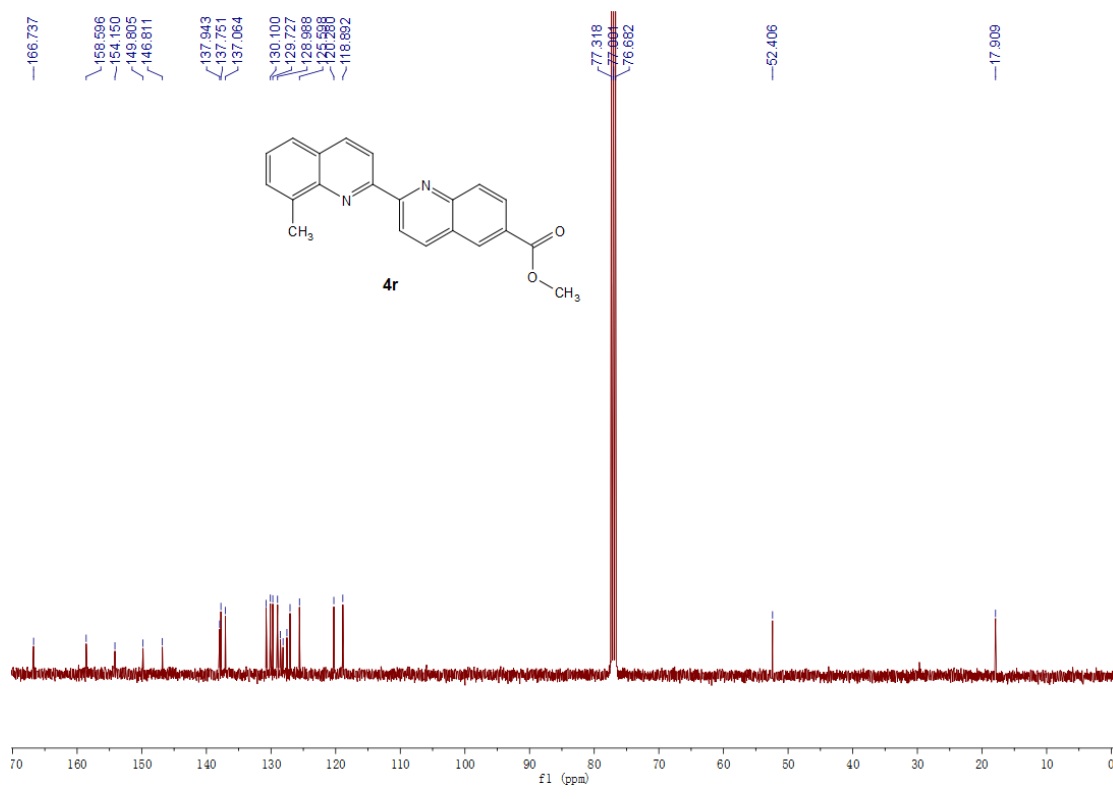

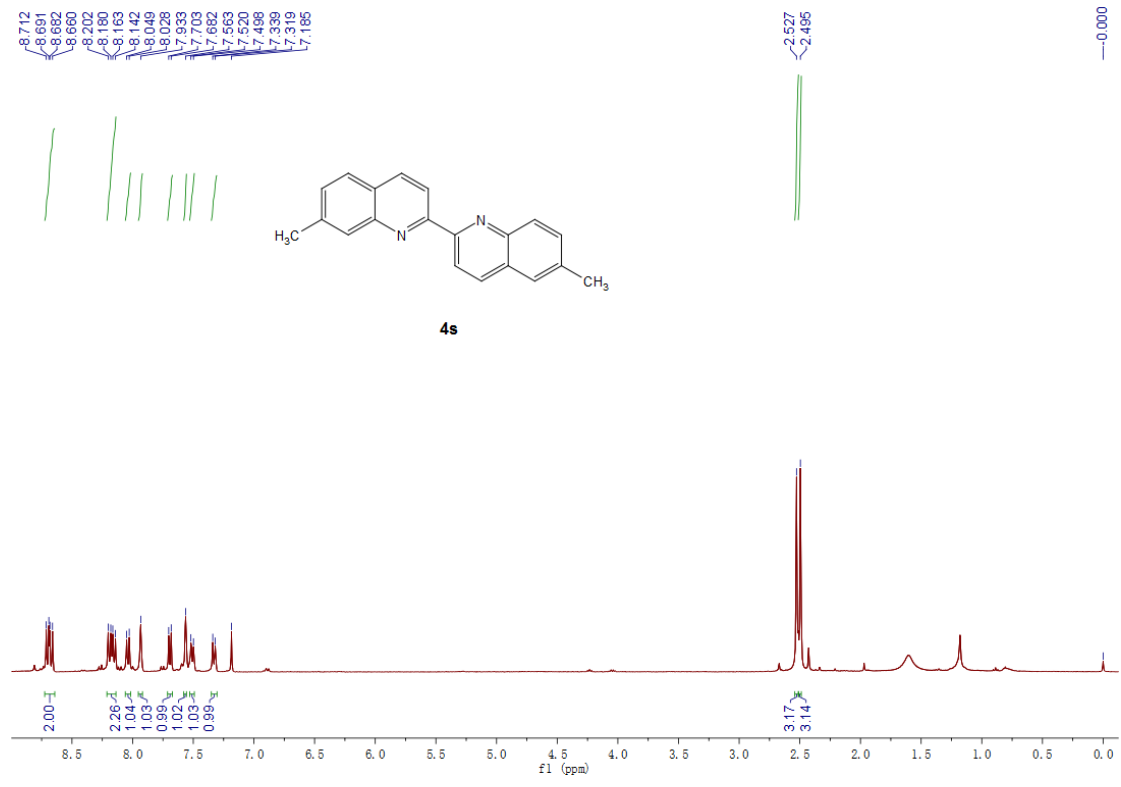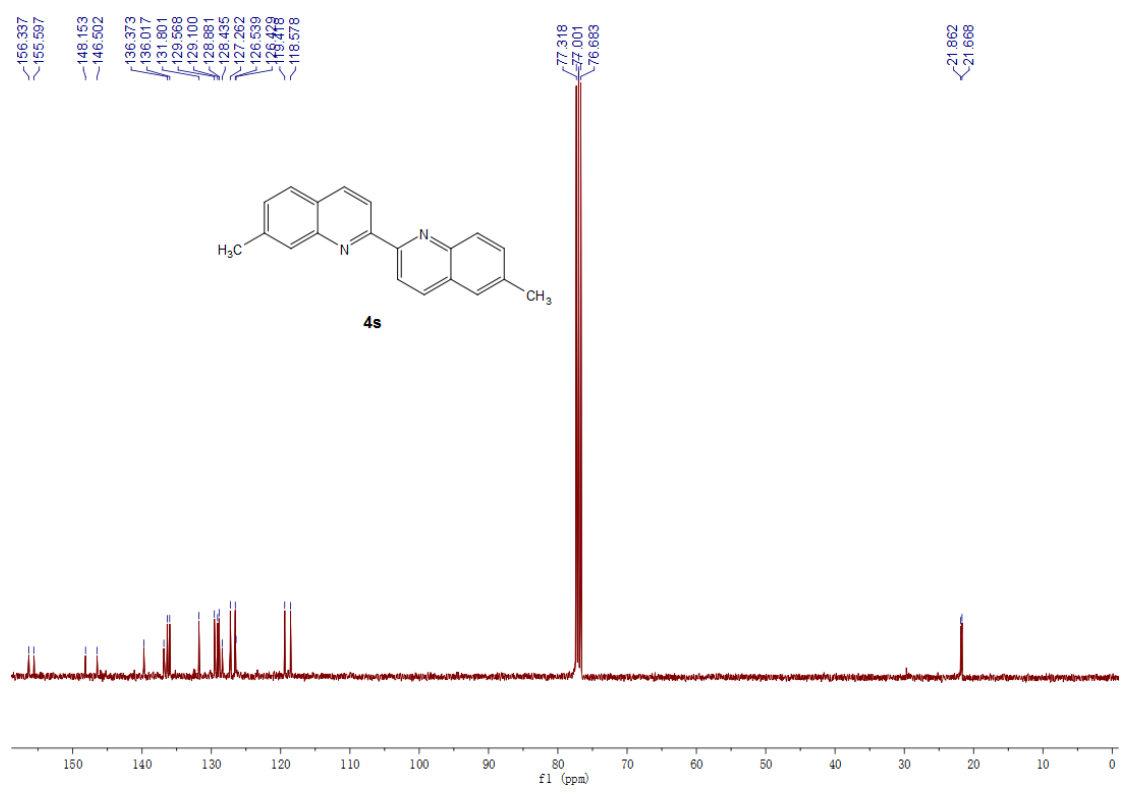



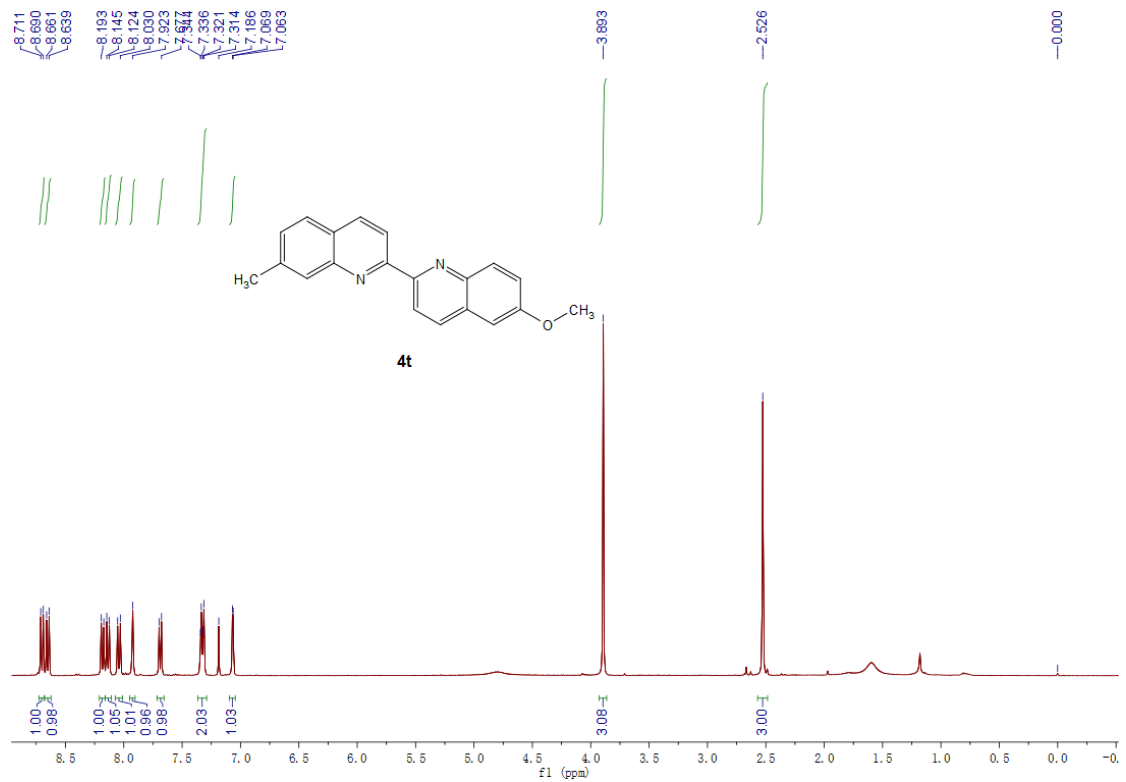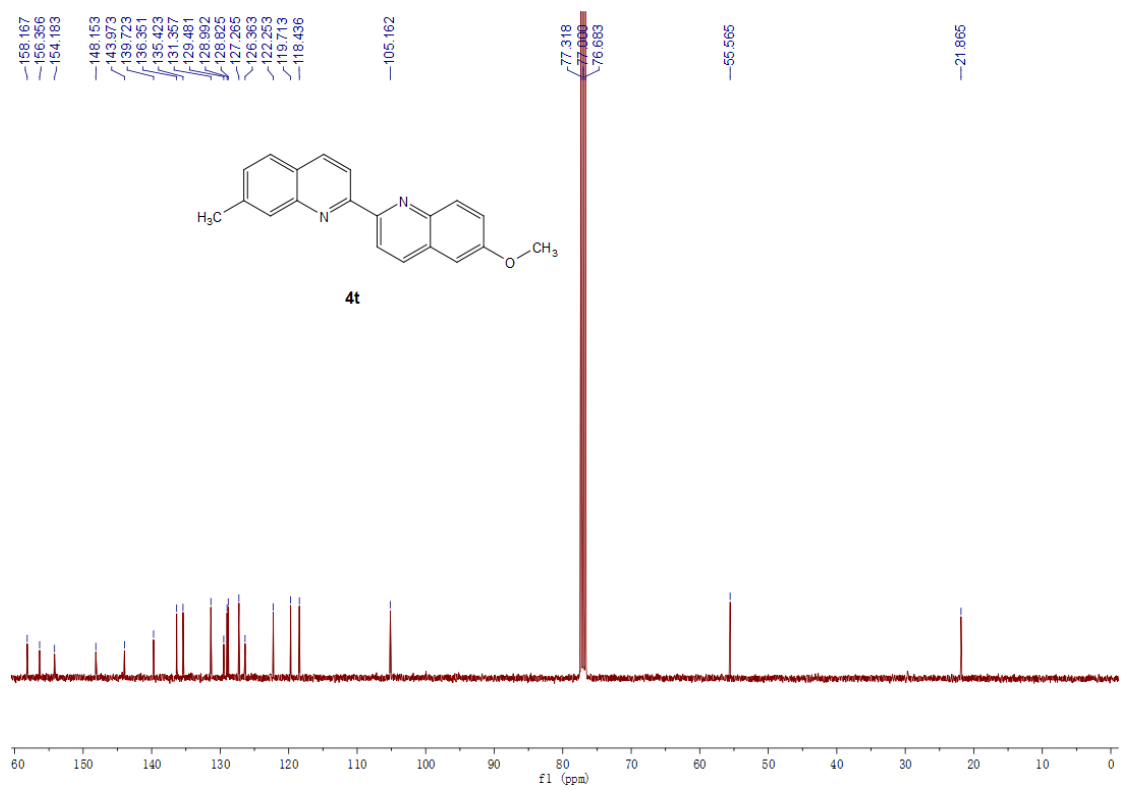

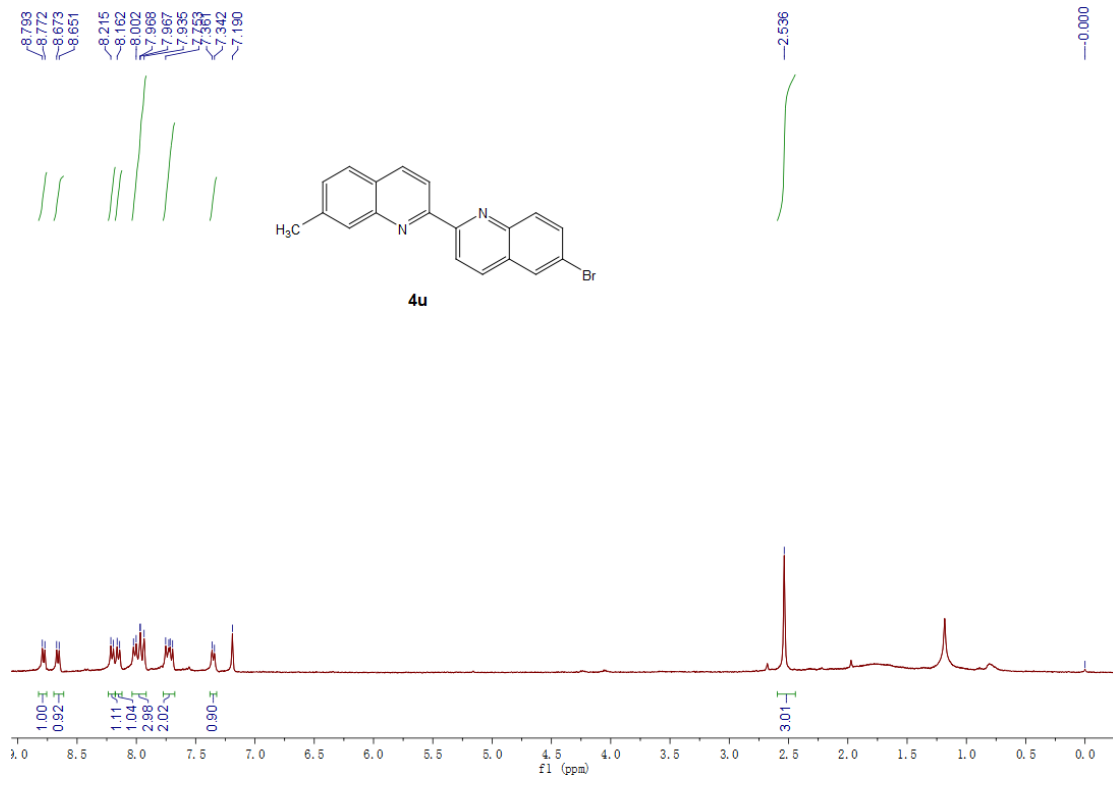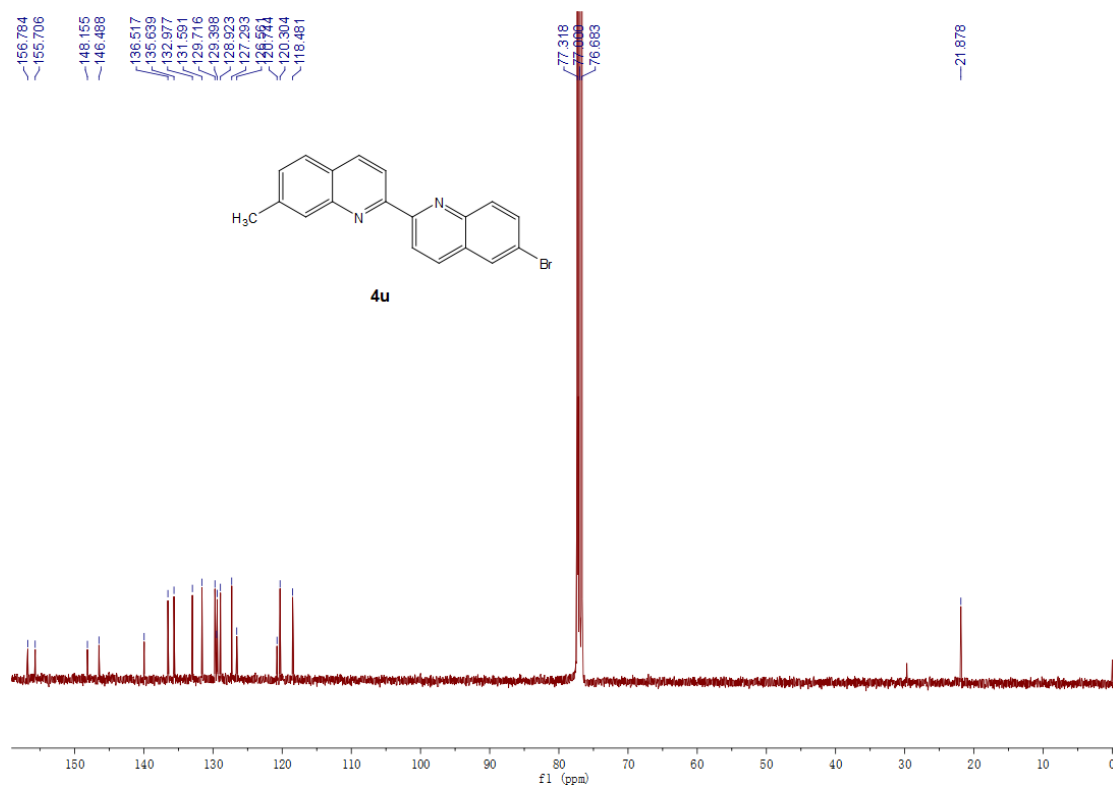

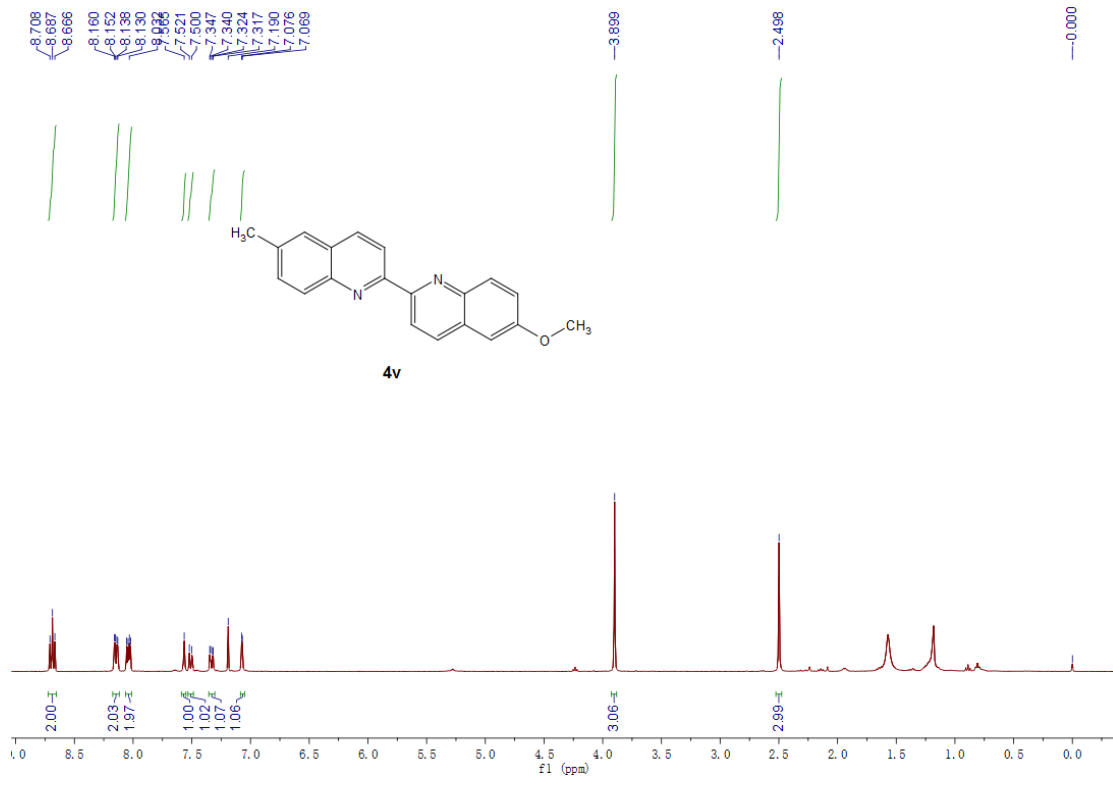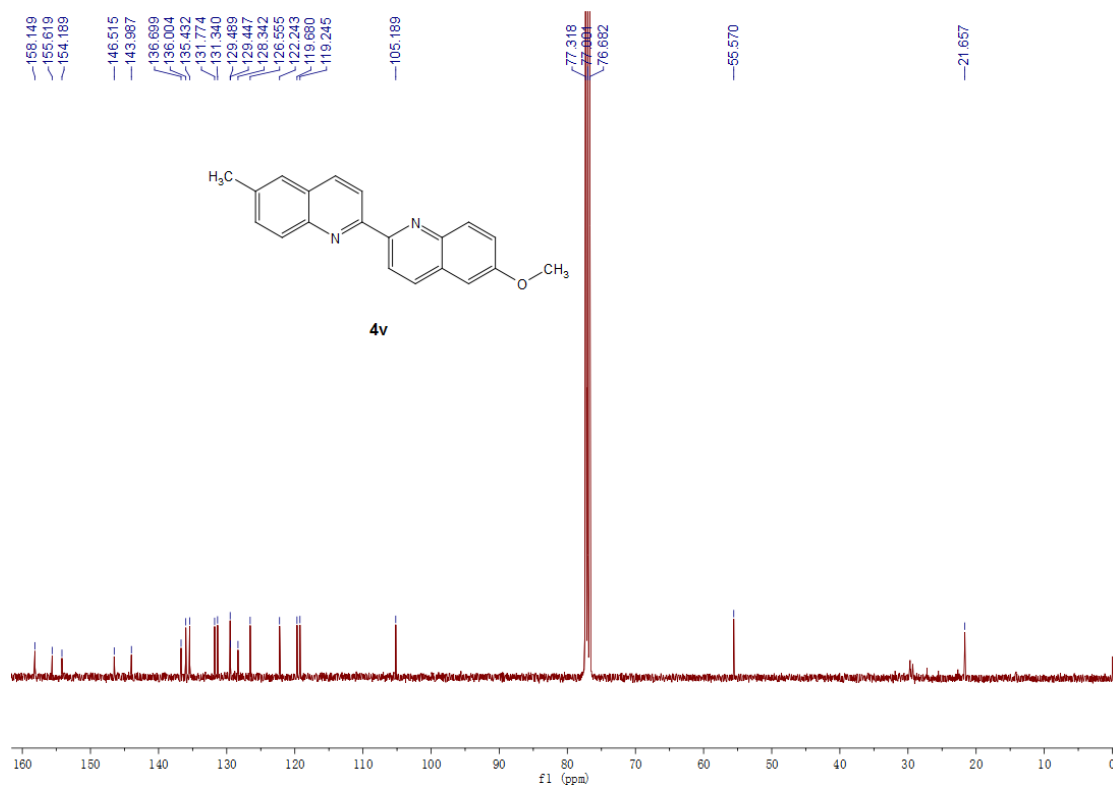

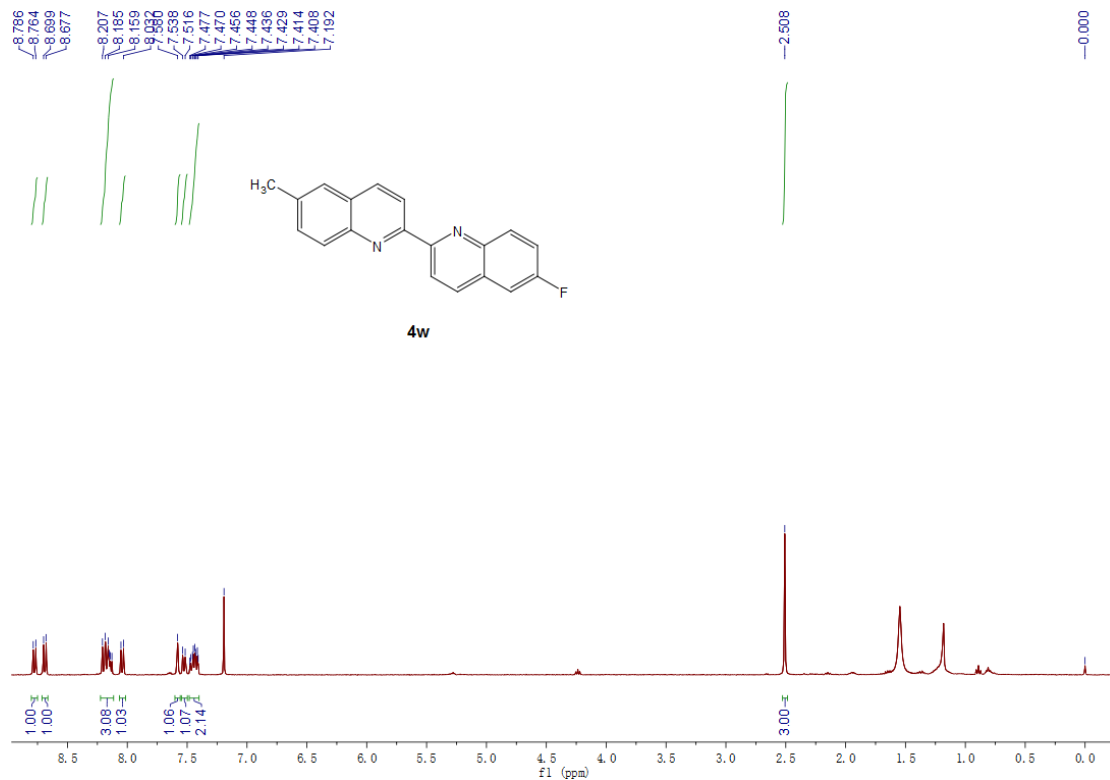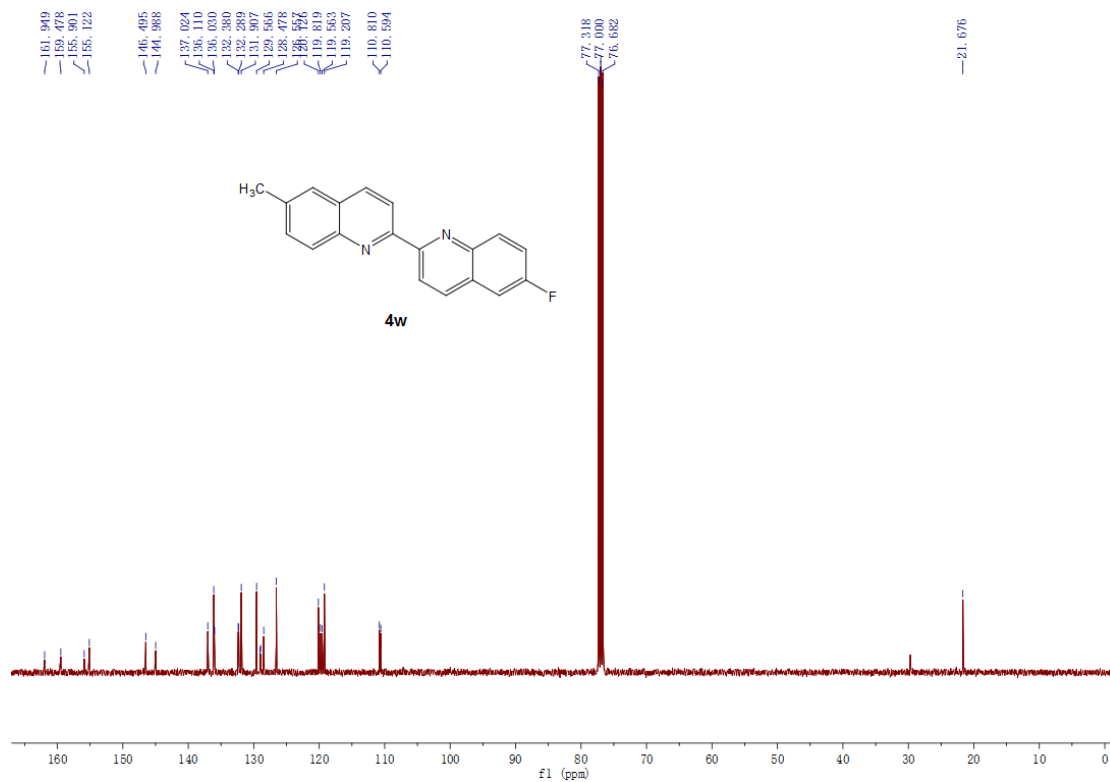

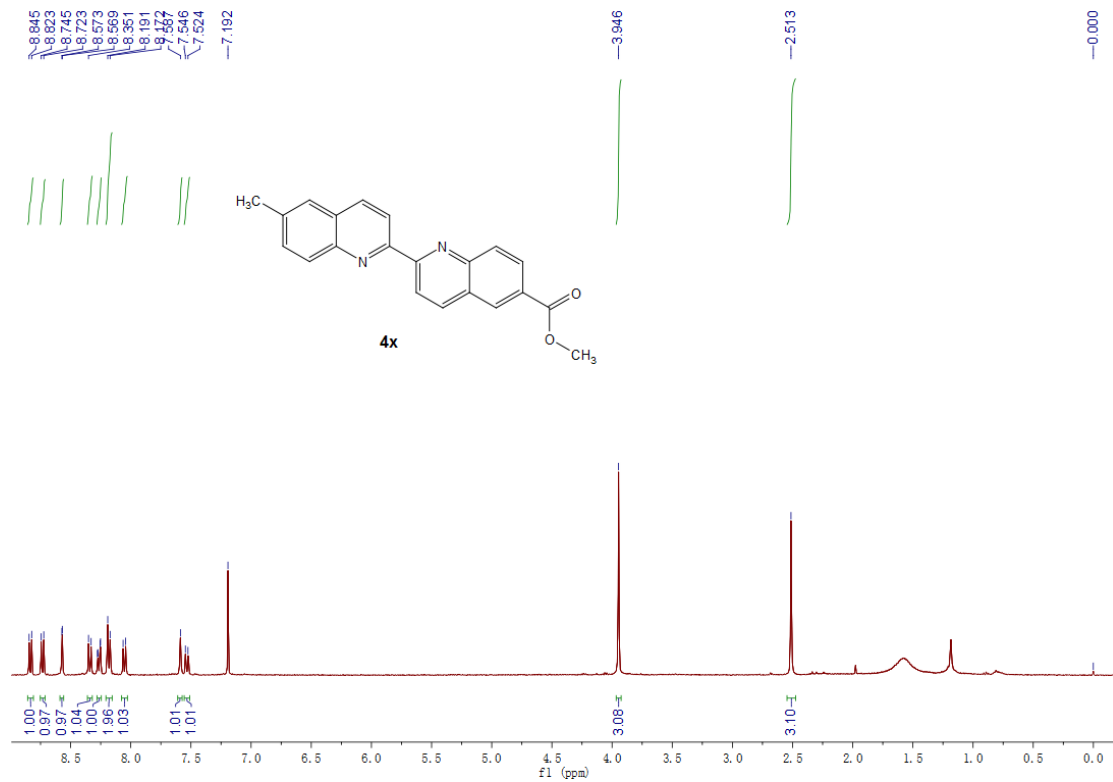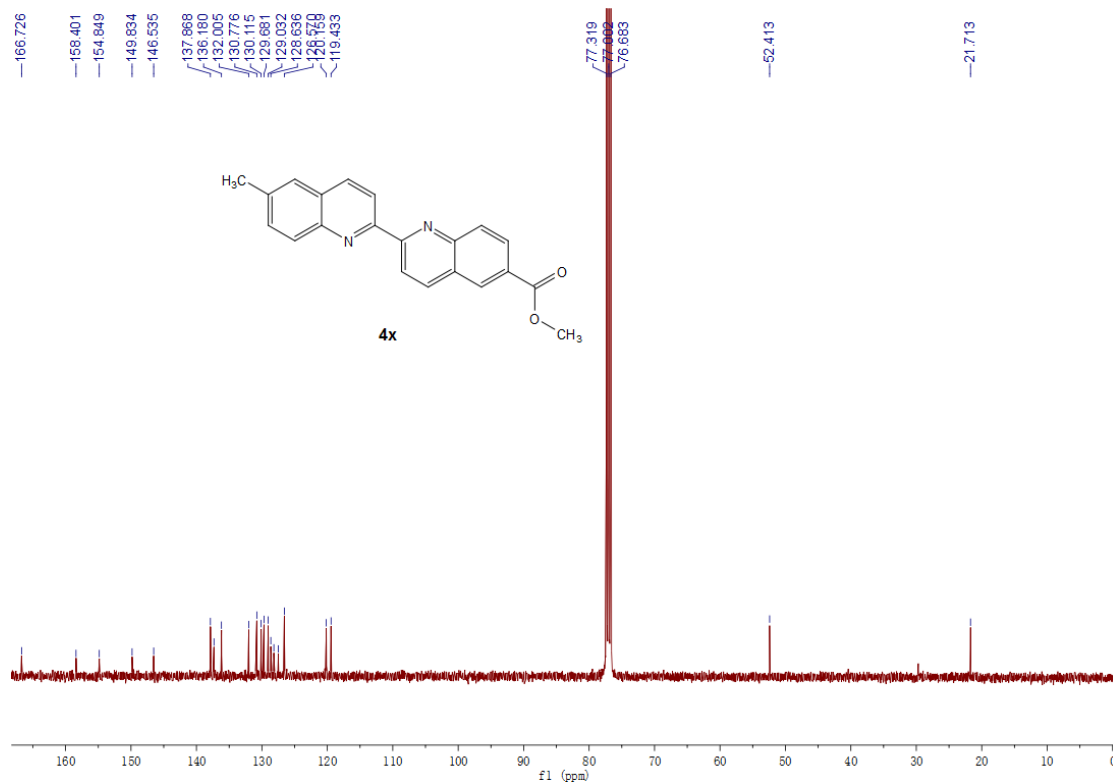

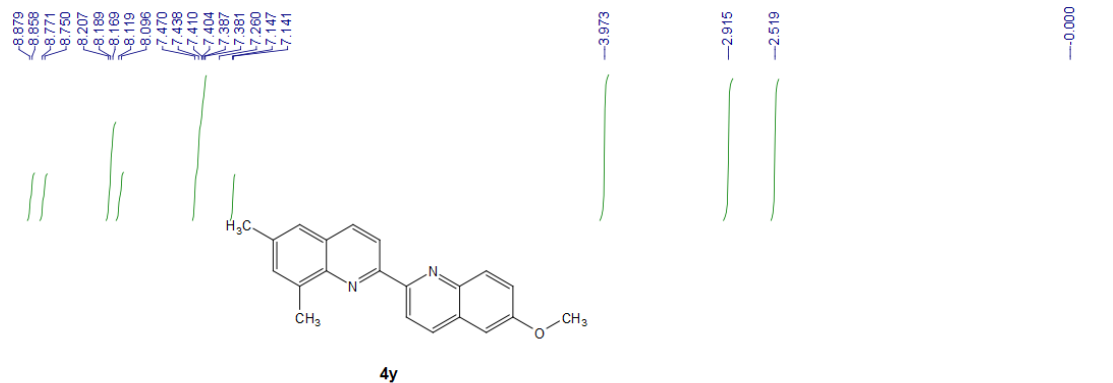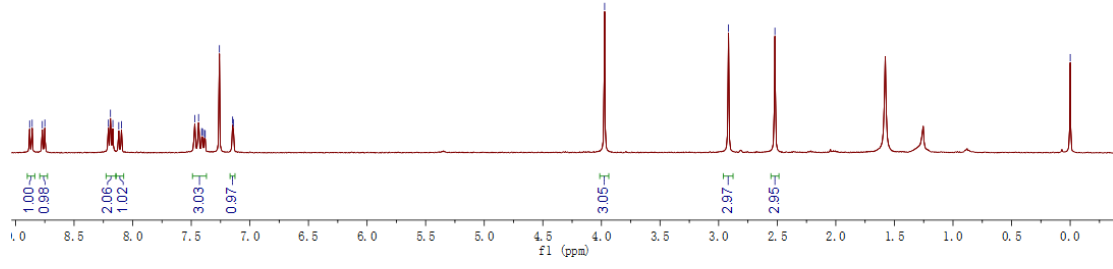

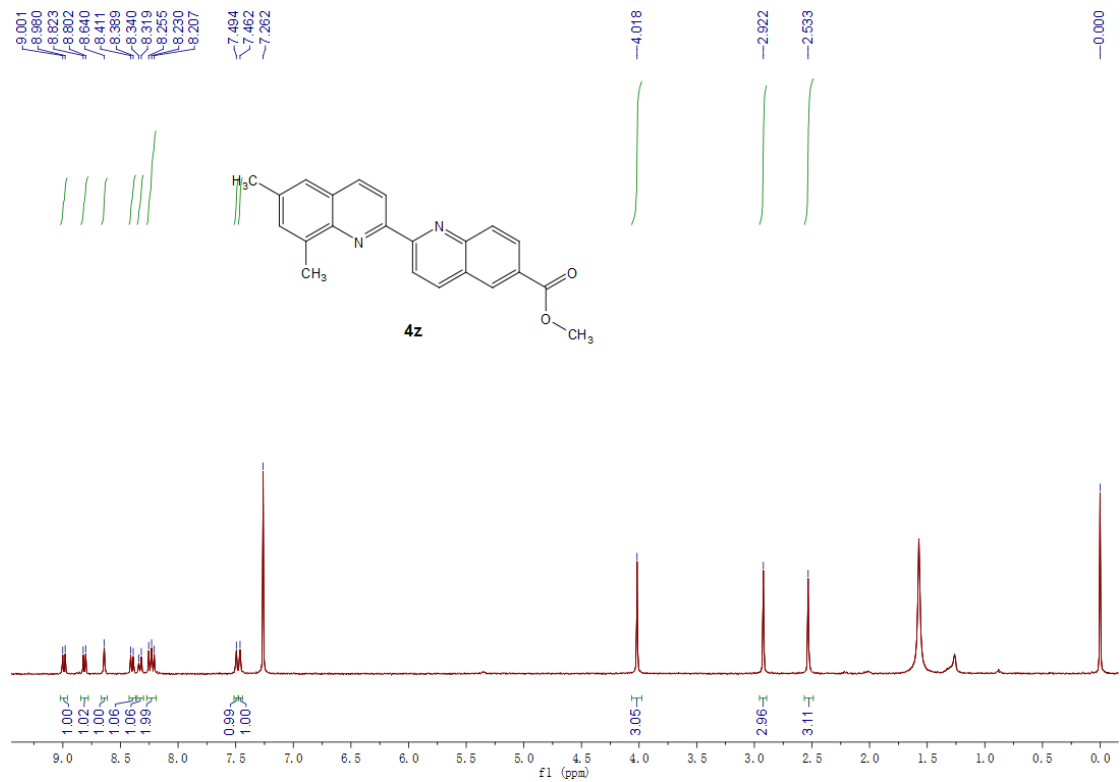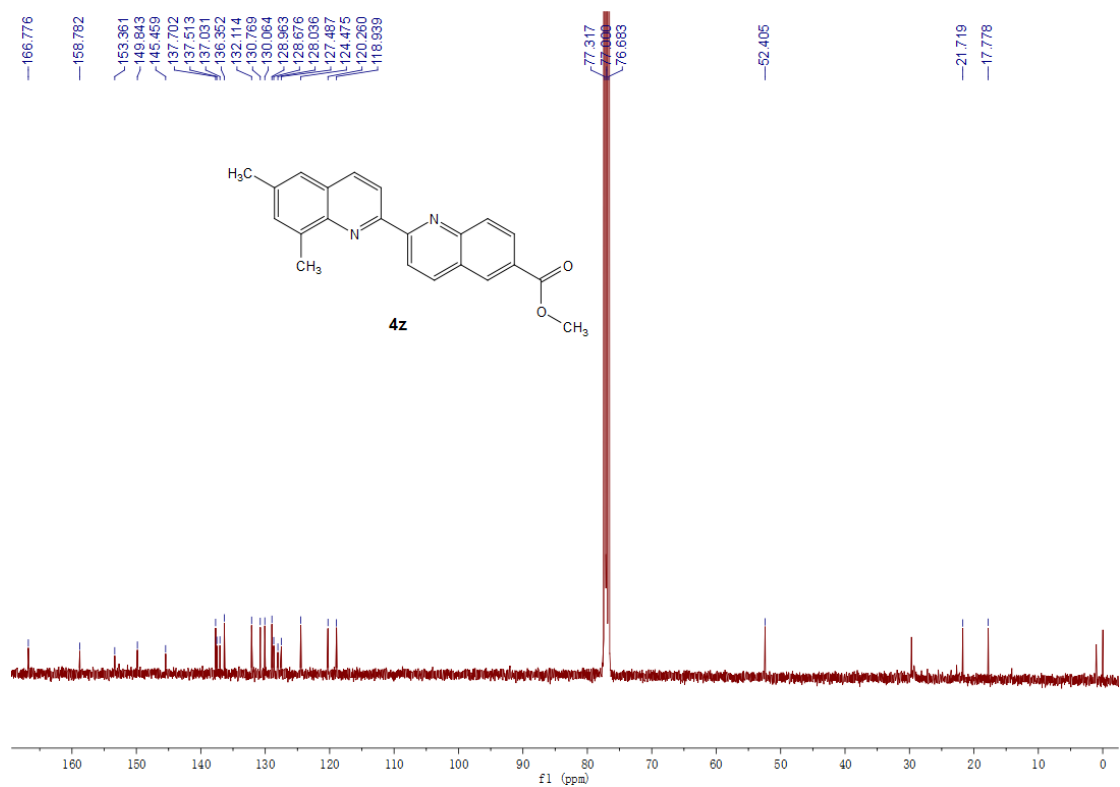

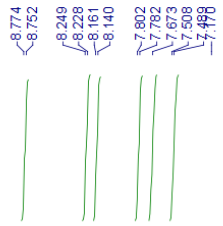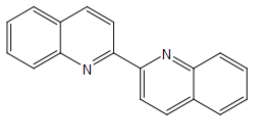

5a

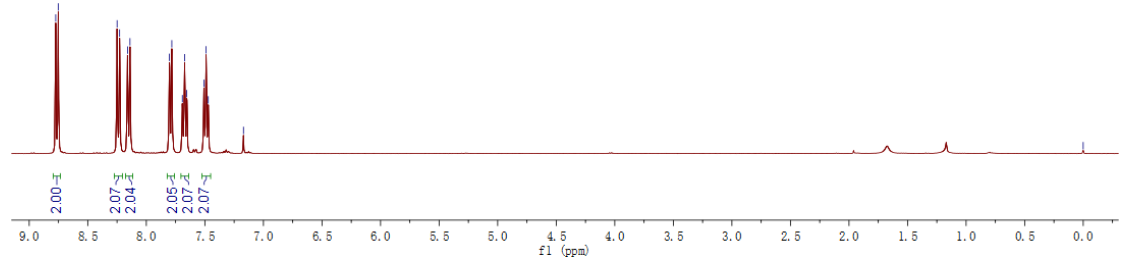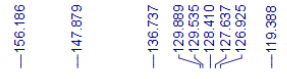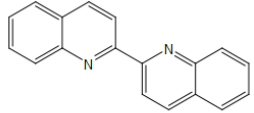

5a

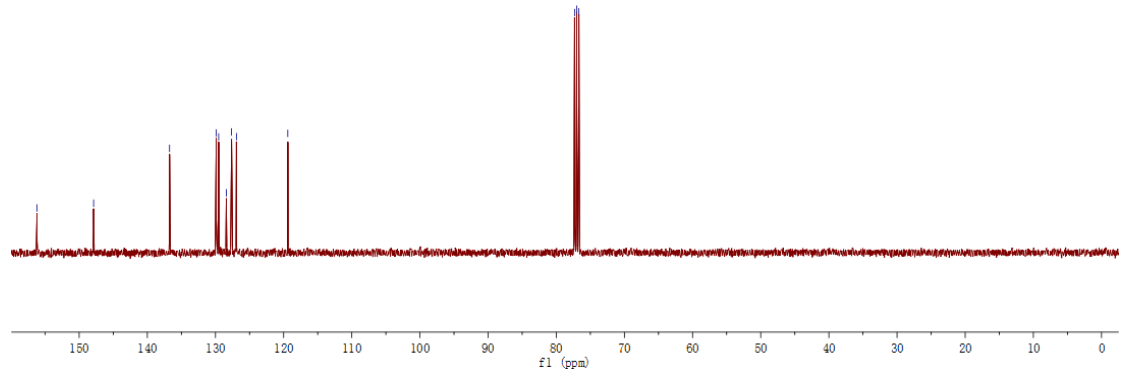



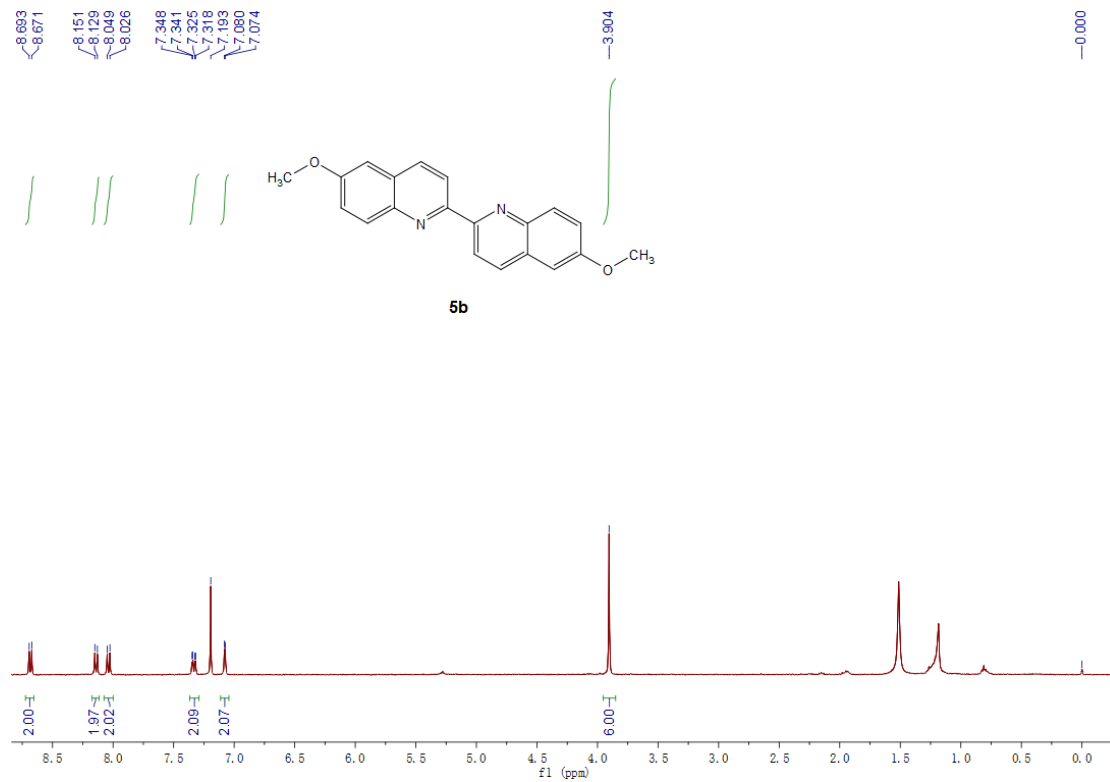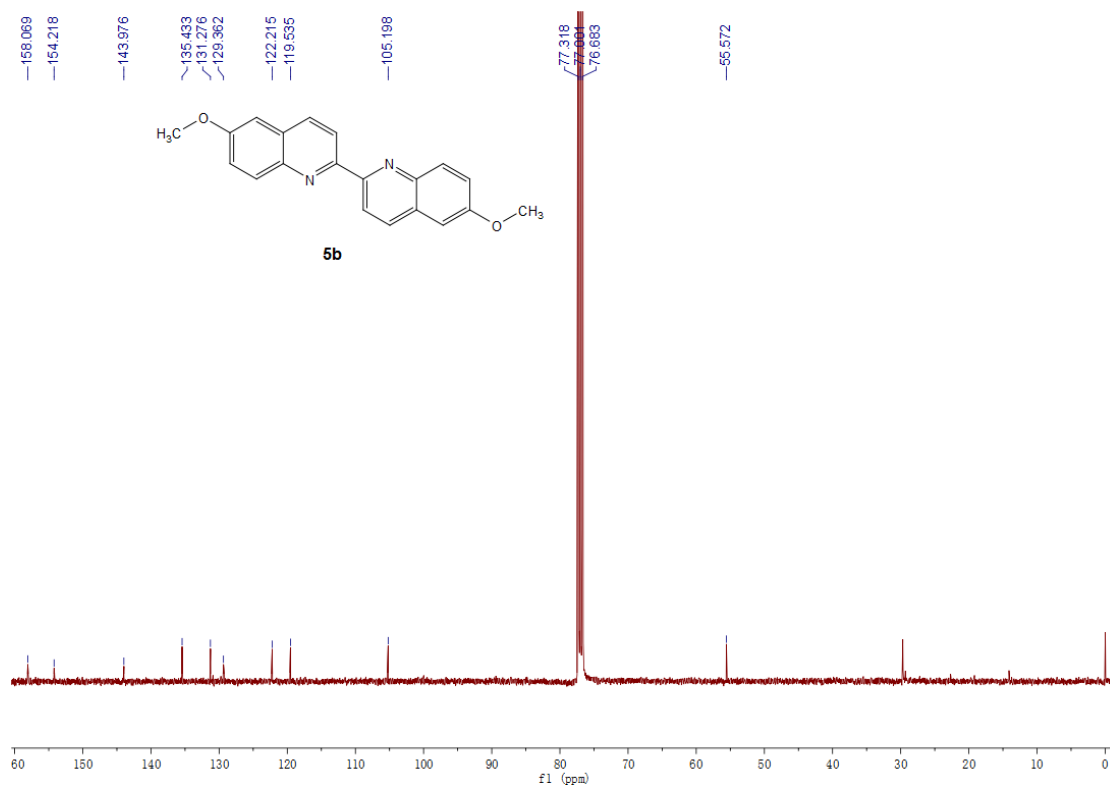

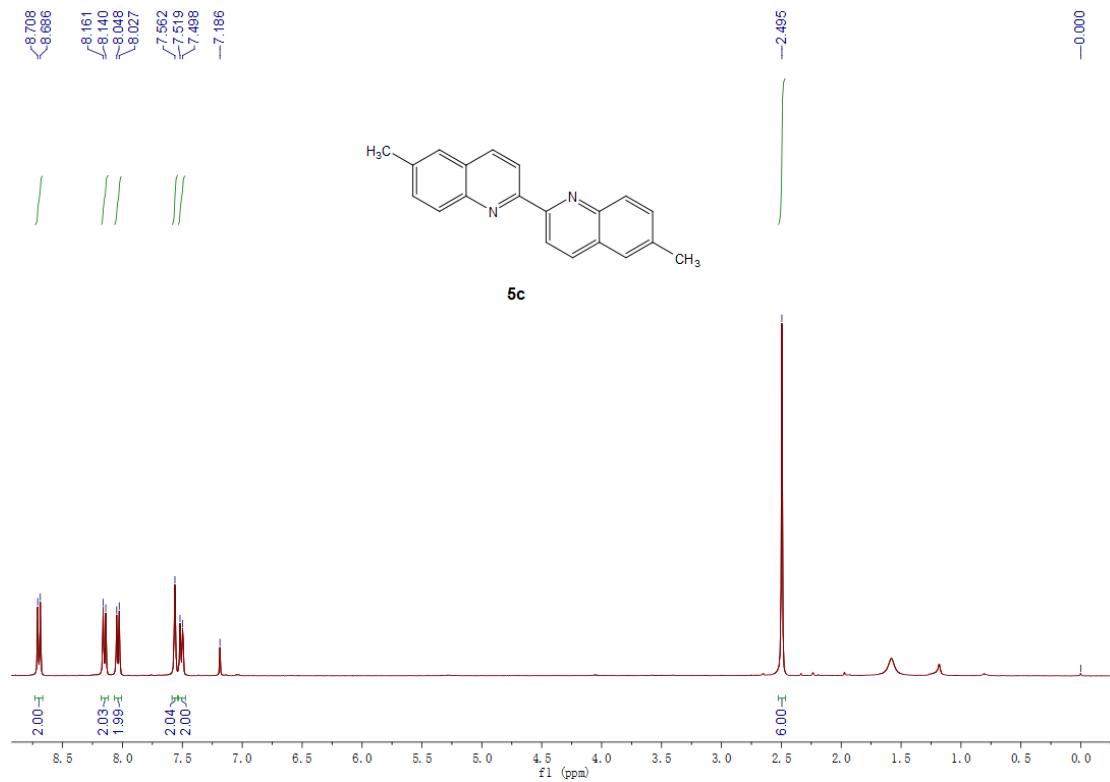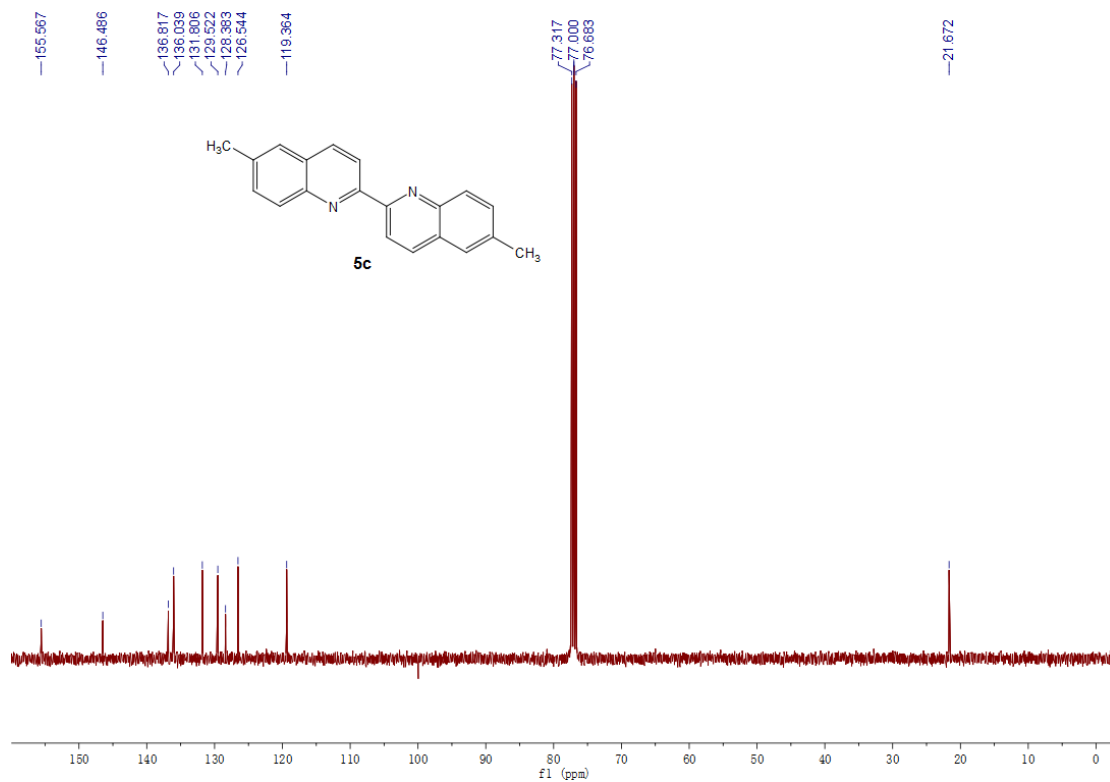

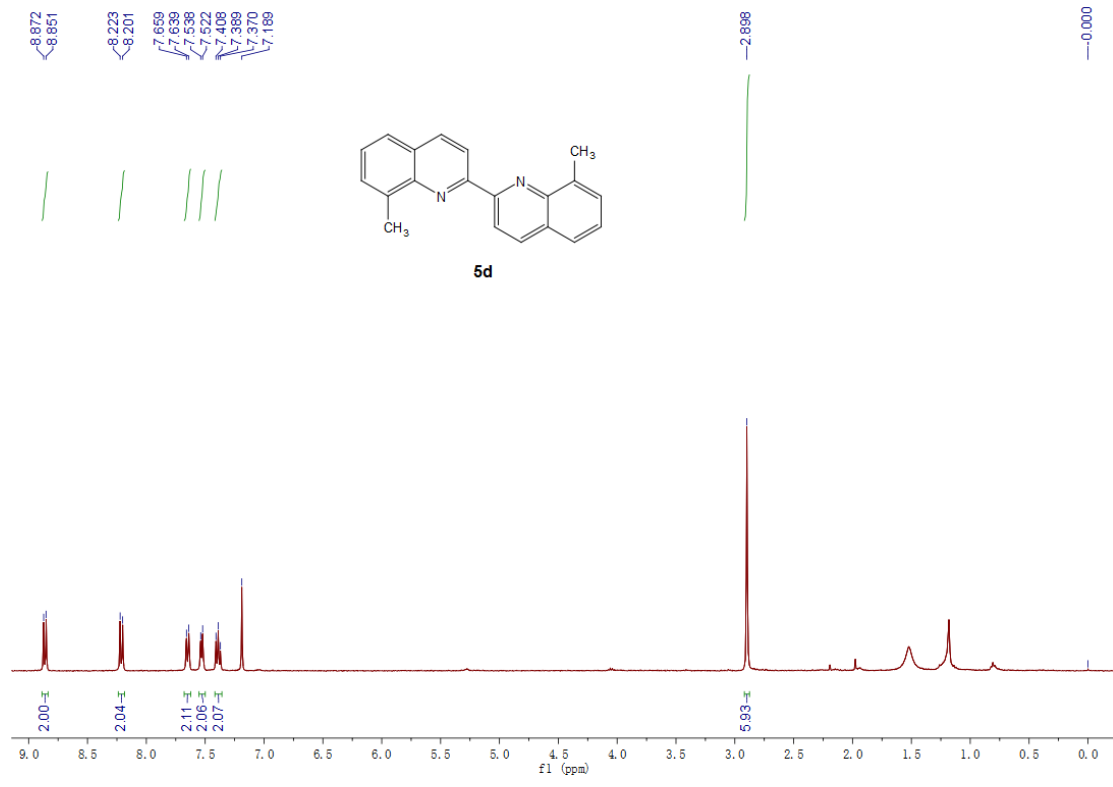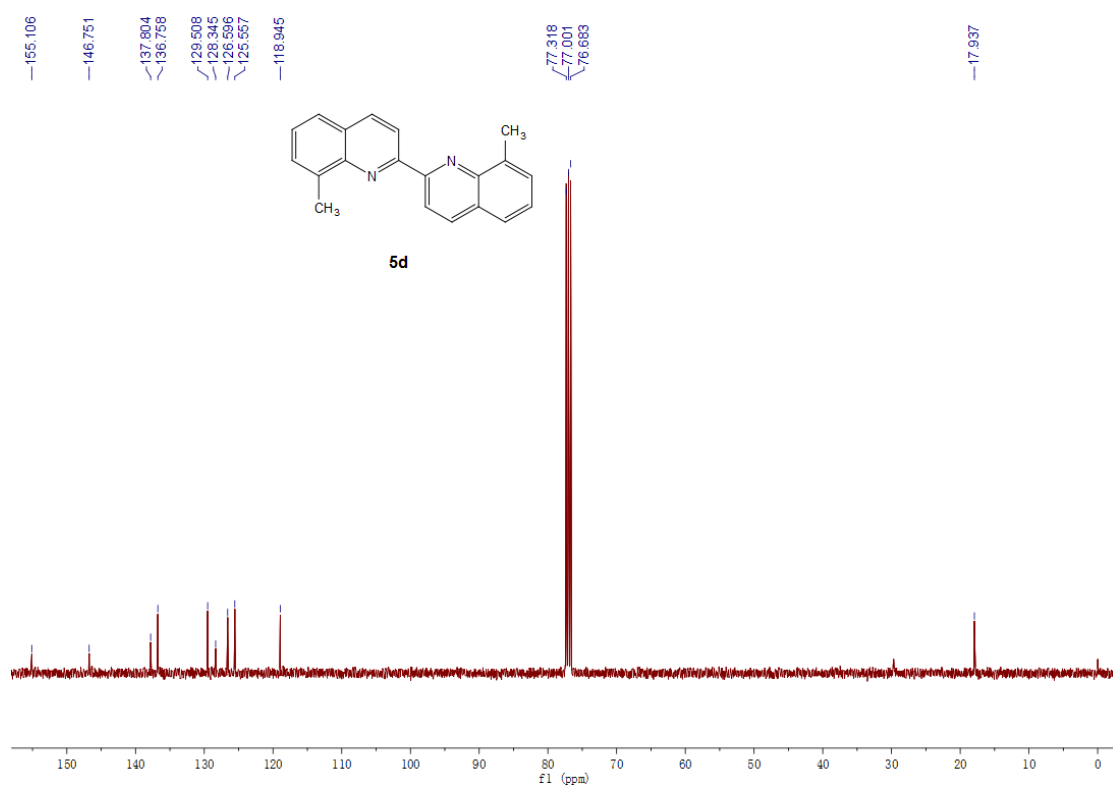

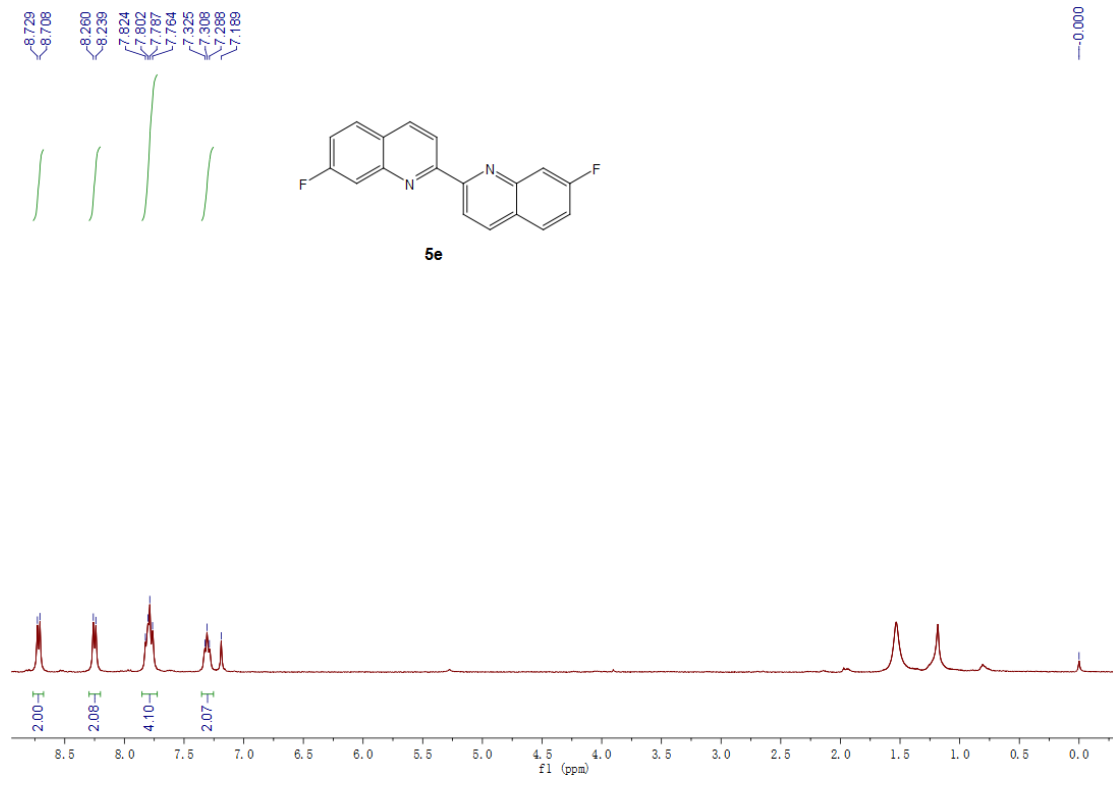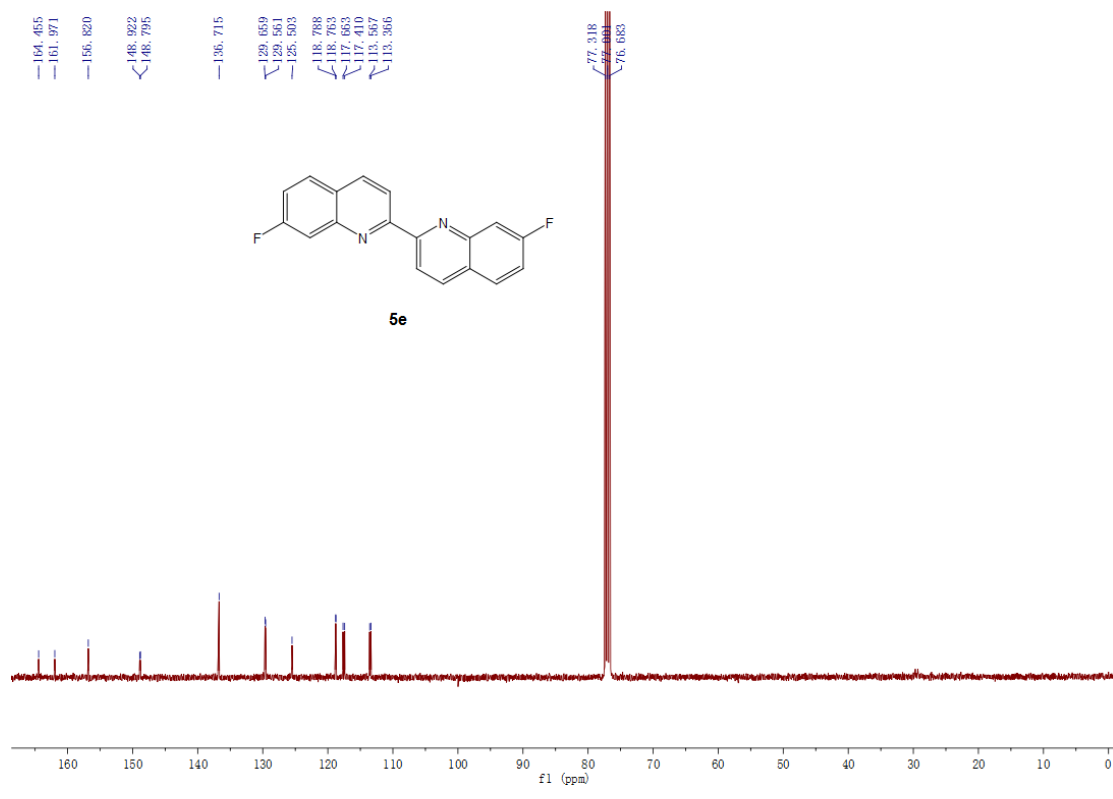

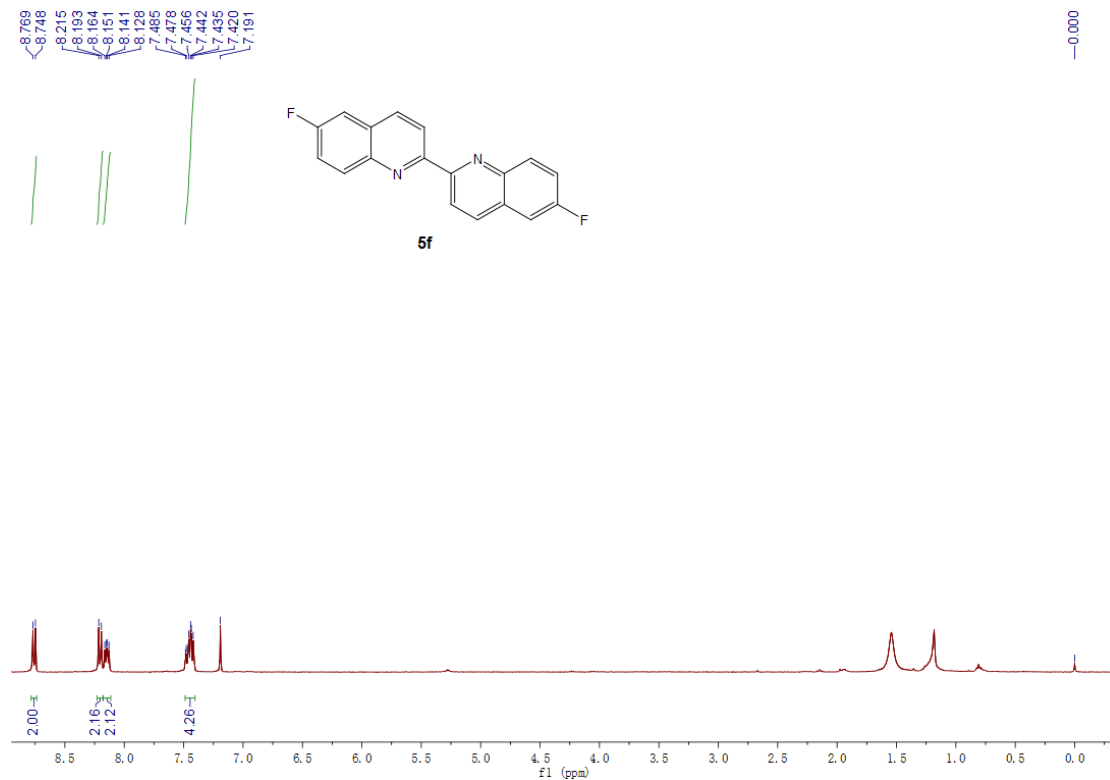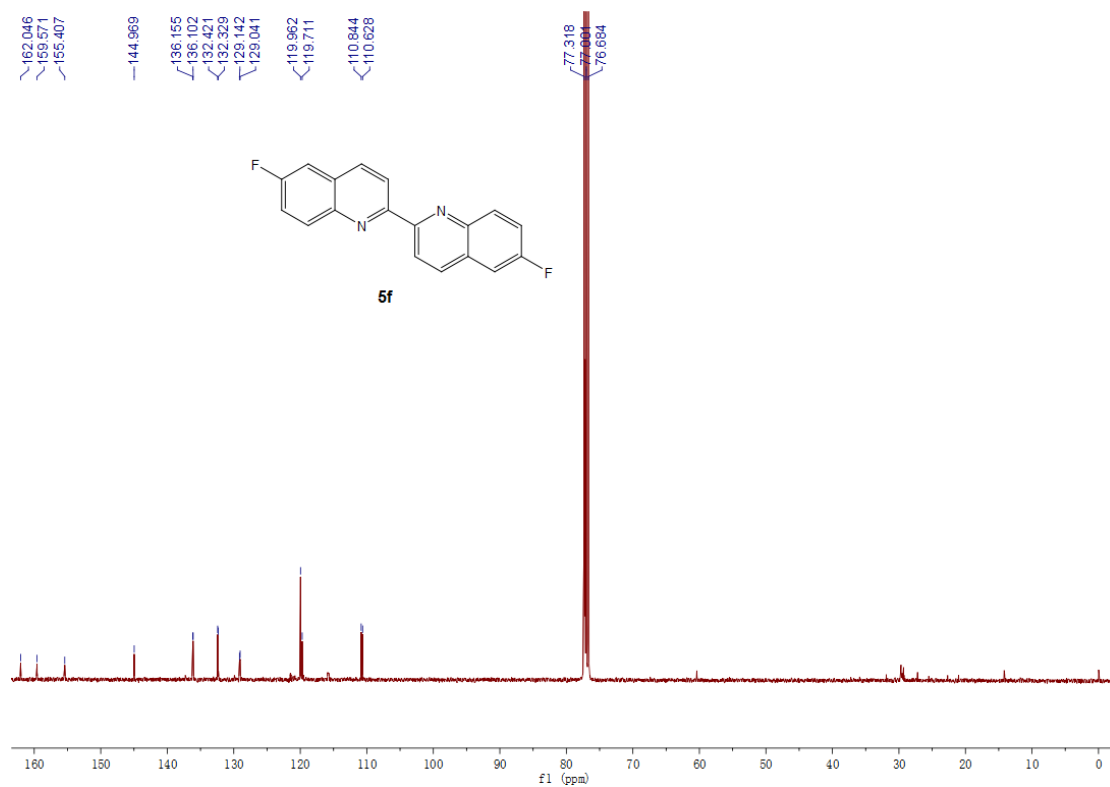

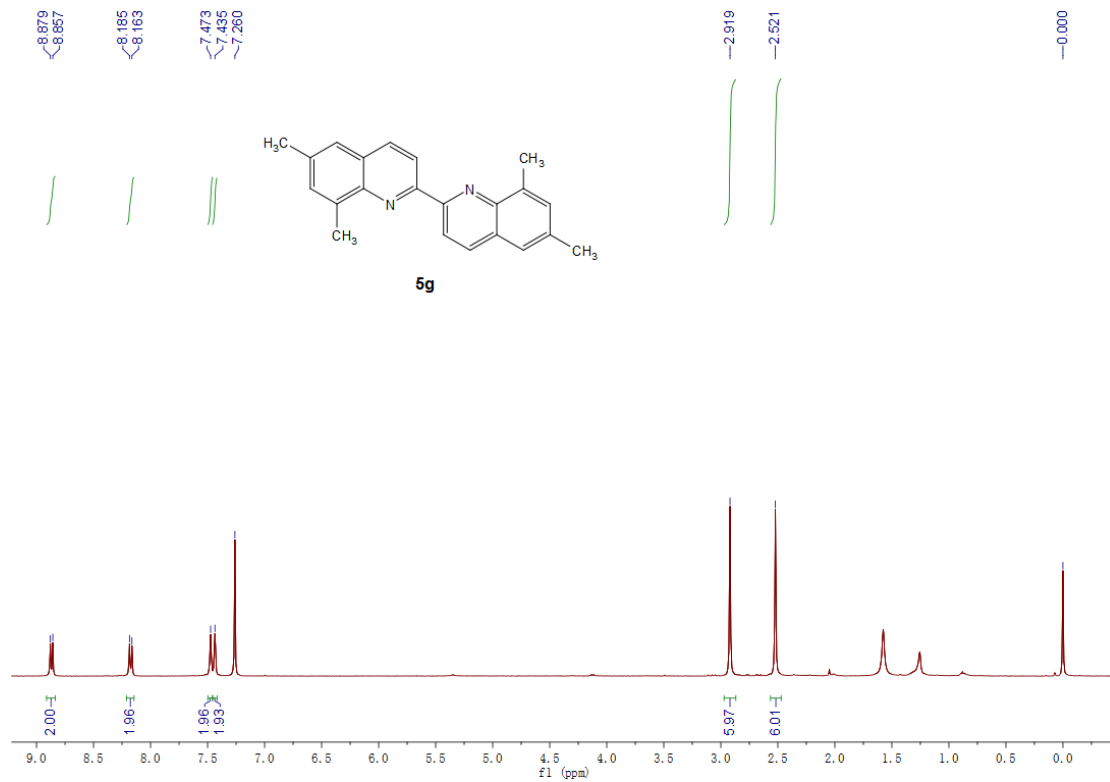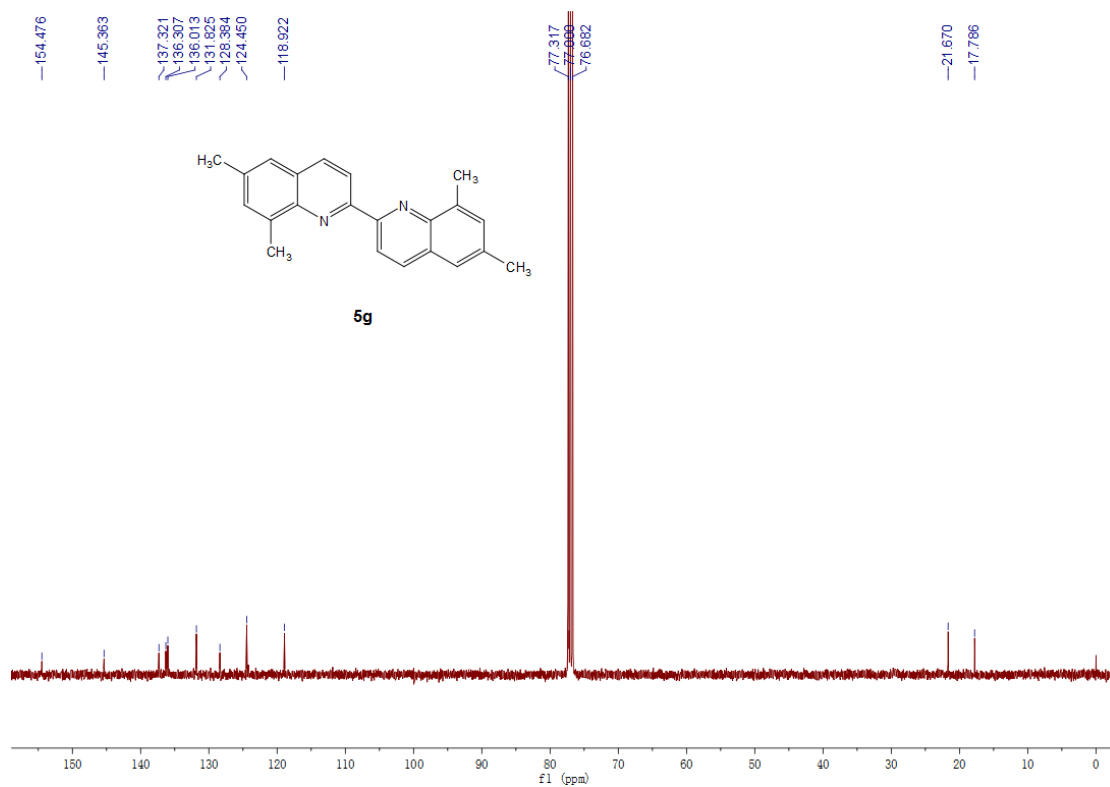

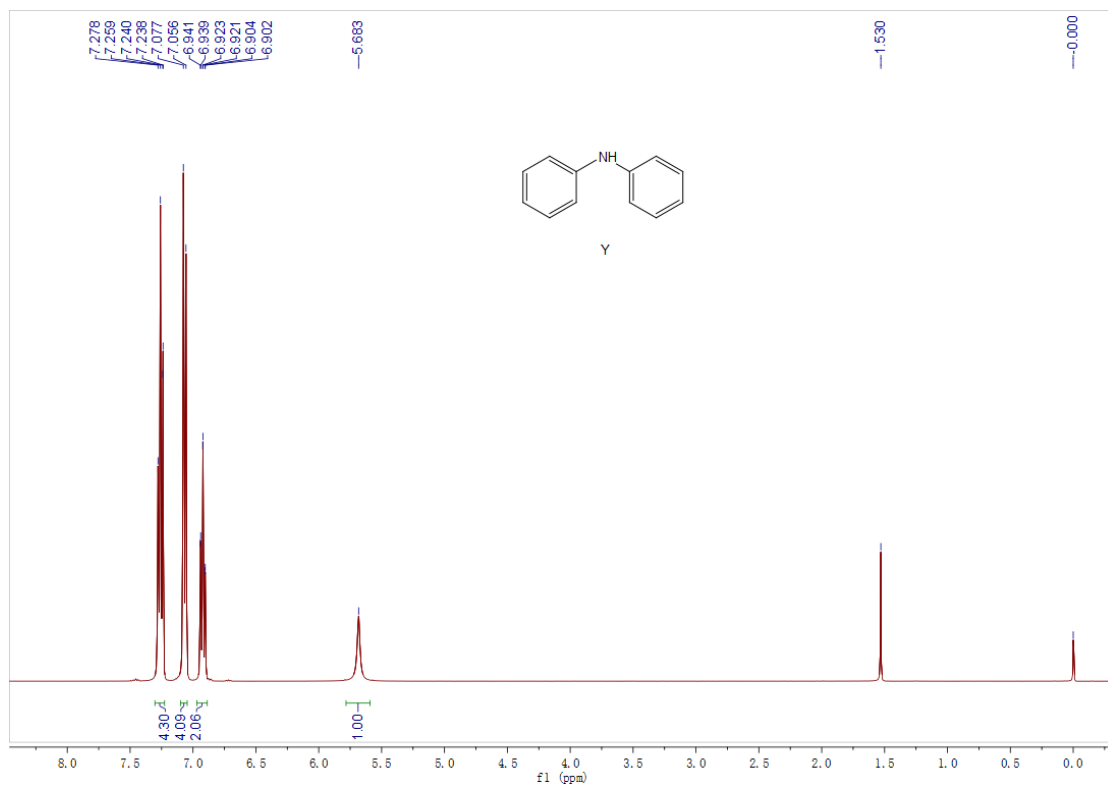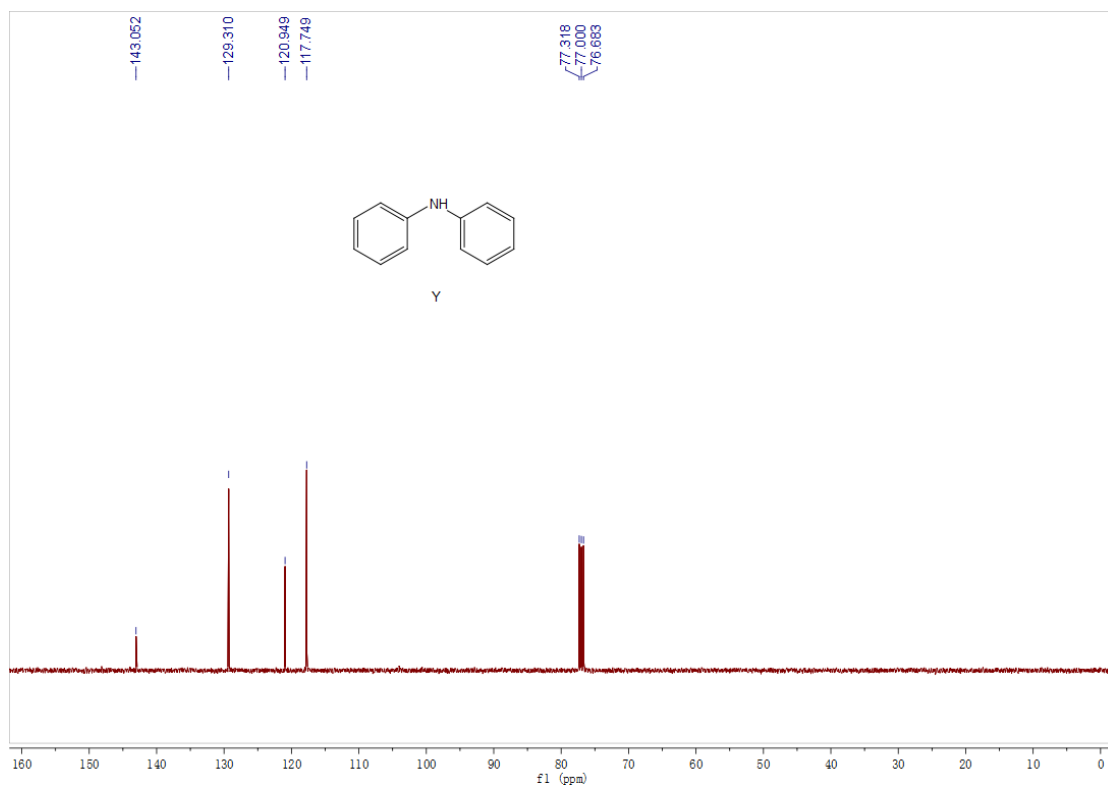

Supplement: d4qo01896f1.pdf [file d4qo01896f1.pdf]
